# Supplementary material for: Isopsoralen suppresses receptor activator of nuclear factor kappa- β ligand-induced osteoclastogenesis by inhibiting the NF- κ B signaling
Source: PeerJ journal article supplement (doi:10.7717/peerj.14560), 2023-01-10
Supplement: All_raw_data(including_WB_data)_version_2.zip [file All_raw_data%28including_WB_data%29_version_2.zip]

## Sheet: Sheet 1
	logFC	AveExpr	t	P.Value	adj.P.Val	B	change
LOC100048461	4.23199	6.24574	82.9465	2.05846e-32	4.28039e-28	63.6709	up
Ccl7	-4.4545	6.03045	-80.7251	4.0879e-32	4.28039e-28	63.0526	down
Mmp9	3.85005	6.14391	80.6694	4.15989e-32	4.28039e-28	63.0368	up
H2-M2	3.61029	3.60445	79.1969	6.62608e-32	5.11351e-28	62.6147	up
Igh-6	-3.62102	5.28519	-77.2562	1.24017e-31	7.65654e-28	62.0433	down
Pltp	3.77479	4.73452	69.8858	1.55977e-30	8.02477e-27	59.7019	up
Id1	-3.66952	3.91032	-69.2525	1.96268e-30	8.65515e-27	59.487	down
Prtn3	-3.17527	4.44552	-68.5232	2.56379e-30	9.43303e-27	59.2365	down
Hist1h2ad	-3.6196	8.00528	-67.9263	3.19717e-30	9.43303e-27	59.0292	down
Hist1h2ao	-3.48055	8.21559	-67.8701	3.26454e-30	9.43303e-27	59.0096	down
LOC640739	-3.2243	3.9791	-67.7915	3.36141e-30	9.43303e-27	58.9821	down
Ccnd1	-3.46328	6.94314	-66.8374	4.80662e-30	1.23646e-26	58.6454	down
Ccl2	-4.56198	4.61664	-66.235	6.03986e-30	1.43419e-26	58.43	down
Scd1	-3.0195	4.75157	-65.8632	6.96133e-30	1.53492e-26	58.2958	down
Clecsf12	4.20104	6.14378	65.4616	8.12266e-30	1.63266e-26	58.1499	up
Kif2c	-3.13037	3.61839	-65.2563	8.79235e-30	1.63266e-26	58.0749	down
Cdca3	-3.86588	5.25644	-65.1984	8.99131e-30	1.63266e-26	58.0537	down
2810417H13Rik	-3.22109	3.89041	-64.9899	9.74774e-30	1.67168e-26	57.9772	down
Birc5	-3.28173	4.13327	-64.6105	1.12989e-29	1.83571e-26	57.8372	down
Atg9b	-3.29399	4.34571	-63.7303	1.59686e-29	2.46468e-26	57.5088	down
Gadd45a	3.15091	6.69294	62.7449	2.36527e-29	3.47683e-26	57.1348	up
Oscar	3.15508	3.73245	62.4106	2.70622e-29	3.7972e-26	57.0064	up
Mcm5	-2.97682	6.04042	-62.1095	3.05717e-29	4.10311e-26	56.8901	down
2610002D18Rik	-2.78705	3.35419	-61.9524	3.25865e-29	4.1913e-26	56.8291	down
Dnmt3l	-3.42041	3.54873	-61.6518	3.68375e-29	4.54854e-26	56.712	down
Psat1	-3.03743	5.65547	-61.3499	4.16879e-29	4.85362e-26	56.5937	down
Mfge8	2.92023	8.55279	61.3057	4.24529e-29	4.85362e-26	56.5763	up
Hist1h2ak	-4.75004	6.62239	-61.1314	4.56114e-29	4.89834e-26	56.5076	down
Trf	3.12105	6.52625	61.1098	4.60176e-29	4.89834e-26	56.4991	up
Hist1h2af	-4.56556	6.41133	-60.4196	6.12703e-29	6.30451e-26	56.2249	down
Tk1	-3.35509	4.17529	-58.9431	1.14275e-28	1.13792e-25	55.6261	down
Plk1	-3.83714	4.31208	-58.3593	1.46836e-28	1.41647e-25	55.3847	down
Dm15	-3.36218	3.7013	-58.1964	1.57545e-28	1.43713e-25	55.3168	down
Anln	-3.39532	4.13528	-58.1767	1.58894e-28	1.43713e-25	55.3086	down
Pbk	-3.29472	3.97835	-58.1185	1.62945e-28	1.43713e-25	55.2843	down
Hist1h2ag	-4.35566	4.44492	-57.8694	1.81563e-28	1.49084e-25	55.18	down
Cdkn3	-2.8124	4.82137	-57.7794	1.88823e-28	1.49084e-25	55.1421	down
Ctsg	-3.43006	4.10757	-57.7456	1.9162e-28	1.49084e-25	55.1279	down
Cdca2	-2.92208	3.66503	-57.7008	1.95405e-28	1.49084e-25	55.1091	down
Gpr162	3.18087	3.54739	57.6756	1.97568e-28	1.49084e-25	55.0984	up
Lcn2	-2.87588	5.71882	-57.6704	1.98012e-28	1.49084e-25	55.0963	down
Mpo	-3.08667	5.17147	-57.563	2.07531e-28	1.49171e-25	55.0509	down
Camp	-3.34057	4.89194	-57.5601	2.07792e-28	1.49171e-25	55.0497	down
LOC100048556	-2.97572	3.33767	-57.2544	2.3761e-28	1.667e-25	54.9202	down
Mt3	3.12253	3.21184	56.8343	2.86022e-28	1.96205e-25	54.7409	up
LOC666036	-2.87602	3.50879	-56.5234	3.28369e-28	2.20357e-25	54.6073	down
LOC100042970	-2.86621	3.69243	-56.4596	3.37835e-28	2.21886e-25	54.5798	down
Hist1h2ah	-4.76712	6.49084	-56.355	3.53979e-28	2.27645e-25	54.5346	down
LOC100047619	-3.0338	6.00108	-55.6665	4.82345e-28	3.03867e-25	54.2346	down
Ctsk	2.96298	8.0439	55.5135	5.16954e-28	3.19157e-25	54.1674	up
Cbr2	-3.02874	4.4676	-54.9134	6.79559e-28	4.11319e-25	53.9018	down
Retnlg	-3.10335	3.41028	-54.752	7.31809e-28	4.34427e-25	53.8298	down
Hist1h2an	-4.68688	5.90497	-54.6713	7.59472e-28	4.42342e-25	53.7938	down
Best1	2.52989	3.21544	54.2756	9.11766e-28	5.21209e-25	53.616	up
Pglyrp1	-2.75617	3.83314	-54.1664	9.59149e-28	5.38327e-25	53.5667	down
Ccrl2	2.6485	4.77474	53.7338	1.17349e-27	6.46865e-25	53.3702	up
Troap	-2.52875	3.07039	-53.4217	1.35868e-27	7.35806e-25	53.2274	down
F13a1	-3.01521	4.79931	-52.2423	2.38189e-27	1.26391e-24	52.6793	down
Uck2	-2.87342	4.35304	-52.213	2.41571e-27	1.26391e-24	52.6655	down
Cdc20	-3.18433	3.65721	-52.1233	2.52238e-27	1.28949e-24	52.6232	down
Cdca8	-2.6169	5.56845	-52.1023	2.54815e-27	1.28949e-24	52.6133	down
Mgll	3.03317	4.10945	51.9209	2.78161e-27	1.38493e-24	52.5275	up
Clec7a	2.97579	5.80445	51.3544	3.66495e-27	1.79577e-24	52.2576	up
Slc7a8	-2.52403	6.21982	-50.8884	4.60849e-27	2.21642e-24	52.033	down
Tmem176b	2.91773	4.46529	50.8628	4.66706e-27	2.21642e-24	52.0206	up
Nup210	-2.73165	4.80779	-50.604	5.30532e-27	2.48136e-24	51.8949	down
AI481316	-2.37786	5.58475	-50.2661	6.27779e-27	2.89237e-24	51.7297	down
Ncaph	-2.33551	4.31019	-49.9483	7.36249e-27	3.34225e-24	51.5731	down
P2ry14	2.34297	6.06051	49.7404	8.1754e-27	3.65748e-24	51.4702	up
Cxcl16	2.44515	3.10574	48.962	1.21497e-26	5.35782e-24	51.0804	up
Kif22	-2.69009	4.41229	-48.9028	1.25244e-26	5.44531e-24	51.0505	down
Slamf7	2.51566	4.71977	48.7772	1.33593e-26	5.68192e-24	50.987	up
Ngp	-2.69807	5.67252	-48.766	1.34368e-26	5.68192e-24	50.9813	down
Aurkb	-2.45551	3.93796	-48.4361	1.59334e-26	6.64658e-24	50.8133	down
Kif4	-2.42265	3.25342	-48.3344	1.67967e-26	6.9133e-24	50.7613	down
Mcm2	-2.41904	4.66577	-48.251	1.75405e-26	7.12446e-24	50.7186	down
Cdkn1c	2.74302	8.39672	48.0854	1.91221e-26	7.66597e-24	50.6334	up
Ltf	-3.31254	6.06707	-47.9684	2.03278e-26	8.04485e-24	50.5731	down
Nr1h3	2.19947	6.57619	47.8176	2.19989e-26	8.59601e-24	50.4952	up
S100a9	-2.51888	7.40417	-47.4563	2.66113e-26	1.02683e-23	50.3072	down
Mns1	-2.48583	2.99288	-47.3026	2.8869e-26	1.10019e-23	50.2268	down
Cd97	2.39101	6.72892	46.9269	3.52632e-26	1.32749e-23	50.029	up
Bex4	2.74391	3.69353	46.8821	3.61188e-26	1.34058e-23	50.0053	up
Ela2	-2.40027	4.48788	-46.8635	3.64796e-26	1.34058e-23	49.9955	down
Chi3l1	-2.44619	4.06074	-46.6554	4.07893e-26	1.48132e-23	49.885	down
Tyms-ps	-2.62343	4.32466	-46.6127	4.17355e-26	1.49806e-23	49.8623	down
Hist1h2ai	-3.70252	7.18582	-46.5076	4.41666e-26	1.56062e-23	49.8063	down
Ccnb1	-2.51536	4.06412	-46.4941	4.44896e-26	1.56062e-23	49.7991	down
Ahnak2	2.455	6.77873	46.2284	5.13668e-26	1.78162e-23	49.6568	up
Itgb7	-3.17781	4.57229	-46.0782	5.57374e-26	1.91173e-23	49.576	down
Ly6c1	-2.79536	5.39989	-45.3317	8.39463e-26	2.84762e-23	49.17	down
scl0001259.1_60	2.3941	4.87956	45.252	8.77295e-26	2.94361e-23	49.1263	up
Mcoln3	2.25775	5.98624	45.1756	9.15241e-26	3.03791e-23	49.0843	up
Aurka	-2.83124	3.83313	-45.0533	9.79614e-26	3.21699e-23	49.0168	down
Tgfbi	-2.48509	4.44564	-45.0301	9.92358e-26	3.22454e-23	49.004	down
Cdc2a	-2.27568	5.06293	-44.9707	1.0257e-25	3.29817e-23	48.9712	down
Lox	2.27672	3.7699	44.7231	1.17795e-25	3.74866e-23	48.8338	up
Dennd2a	2.26446	4.25216	44.1751	1.60428e-25	5.05332e-23	48.5269	up
2010001H16Rik	2.22063	6.06209	44.1437	1.63311e-25	5.09218e-23	48.5092	up
Cxcl4	-2.94648	6.16355	-43.9355	1.83844e-25	5.67509e-23	48.3914	down
LOC547343	2.27173	6.49716	43.9173	1.85765e-25	5.6776e-23	48.3811	up
Cyp27a1	2.1744	4.61476	43.8295	1.9531e-25	5.91082e-23	48.3312	up
H2afx	-2.32164	5.38497	-43.5596	2.27986e-25	6.83273e-23	48.1773	down
Fignl1	-2.47073	3.71841	-43.1303	2.92168e-25	8.67206e-23	47.9303	down
2700094K13Rik	-2.06662	5.81361	-43.0272	3.102e-25	9.11959e-23	47.8707	down
BC031353	2.0565	4.86219	42.9036	3.3337e-25	9.7083e-23	47.7989	up
Eno2	1.89715	4.59643	42.8448	3.45025e-25	9.9431e-23	47.7646	stable
Nfe2	-2.10917	4.19637	-42.8307	3.47875e-25	9.9431e-23	47.7564	down
Fpr2	-2.09919	3.95581	-42.8083	3.52455e-25	9.98158e-23	47.7434	down
Nanos1	-2.15561	2.85367	-42.6798	3.80015e-25	1.06643e-22	47.6684	down
P2rx4	2.43883	7.23525	42.0978	5.35816e-25	1.4901e-22	47.3256	up
Chi3l3	-2.39635	5.89412	-41.5767	7.31733e-25	2.01677e-22	47.0145	down
Htra1	2.25246	3.22912	41.3545	8.36665e-25	2.28558e-22	46.8806	up
B230342M21Rik	2.00236	5.55454	41.3035	8.62895e-25	2.33655e-22	46.8498	up
Hist2h2ac	-2.1237	8.75448	-41.1833	9.28137e-25	2.49136e-22	46.7769	down
Lrp8	-2.39317	4.09425	-40.5824	1.34025e-24	3.56658e-22	46.4094	down
Fdps	-2.24278	7.81433	-40.5564	1.36191e-24	3.59323e-22	46.3934	down
Dab2	-2.00165	7.32199	-40.5232	1.39009e-24	3.60831e-22	46.3729	down
2010317E24Rik	-2.09762	2.94413	-40.5221	1.39101e-24	3.60831e-22	46.3722	down
Phgdh	-2.11627	3.62628	-40.5063	1.40471e-24	3.61349e-22	46.3624	down
1110046J11Rik	2.38843	5.69575	40.3099	1.5861e-24	4.04638e-22	46.2408	up
Cd72	2.14375	6.31604	40.2586	1.63734e-24	4.1383e-22	46.209	up
Klf2	-2.14674	5.17743	-40.2473	1.64894e-24	4.1383e-22	46.2019	down
Apoe	2.44556	8.43749	40.0569	1.85633e-24	4.62123e-22	46.0833	up
Plac8	-1.93028	4.71577	-40.0397	1.87634e-24	4.62809e-22	46.0725	stable
Nhedc2	1.94192	4.03095	40.0289	1.88908e-24	4.62809e-22	46.0658	stable
Cd274	2.16327	6.5269	39.9998	1.92371e-24	4.64453e-22	46.0476	up
9930004G02Rik	2.39376	3.93363	39.998	1.92588e-24	4.64453e-22	46.0464	up
LOC667005	-1.94668	2.81633	-39.7963	2.18513e-24	5.2289e-22	45.9199	stable
Lyz1	2.4411	6.49335	39.5877	2.49169e-24	5.9166e-22	45.7883	up
LOC229810	-1.98893	4.57275	-39.3849	2.83269e-24	6.67498e-22	45.6597	stable
Brrn1	-2.13774	3.75544	-39.3189	2.9538e-24	6.90764e-22	45.6177	down
Ifitm1	-1.98709	4.69041	-39.2794	3.02885e-24	7.0299e-22	45.5926	stable
Tapbp	2.04034	4.41602	39.2383	3.1091e-24	7.16231e-22	45.5664	up
Hpse	1.87434	6.5998	39.1648	3.2582e-24	7.45017e-22	45.5194	stable
Thoc4	-1.79116	7.03578	-38.9914	3.63981e-24	8.26157e-22	45.4082	stable
Cd200	2.20994	3.99843	38.9425	3.75571e-24	8.46241e-22	45.3768	up
LOC234081	-2.37187	3.38194	-38.8873	3.89116e-24	8.70407e-22	45.3412	down
Tiam1	-1.86246	4.5537	-38.869	3.93706e-24	8.72062e-22	45.3295	stable
LOC100045967	-2.00075	7.46484	-38.8619	3.95506e-24	8.72062e-22	45.3249	down
S100a1	1.93896	8.56901	38.7945	4.13018e-24	9.04217e-22	45.2814	stable
AI595366	1.82605	4.34329	38.5889	4.71604e-24	1.02521e-21	45.1482	stable
Nt5dc2	-2.08929	5.92732	-38.5248	4.91563e-24	1.06112e-21	45.1066	down
Odz4	2.41683	3.93576	38.4808	5.0578e-24	1.08423e-21	45.078	up
Egr2	2.17132	5.3675	38.4533	5.14887e-24	1.09614e-21	45.0601	up
Gpr84	-1.95234	3.1091	-38.4334	5.21591e-24	1.10281e-21	45.0471	stable
LOC100046741	-1.77102	4.05543	-38.3824	5.39164e-24	1.13221e-21	45.0138	stable
Traf1	1.66833	2.9166	38.09	6.52492e-24	1.36015e-21	44.8221	stable
Tspan10	2.16971	3.48824	38.0806	6.56524e-24	1.36015e-21	44.8159	up
C030025P15Rik	-2.02549	3.0008	-38.0244	6.81194e-24	1.40185e-21	44.7788	down
Fxyd2	1.72159	3.16182	37.9864	6.98361e-24	1.42766e-21	44.7538	stable
Acat2	-2.44123	4.88032	-37.8359	7.71044e-24	1.56588e-21	44.6543	down
Il1a	1.91632	3.05179	37.794	7.92649e-24	1.59923e-21	44.6265	stable
Tst	1.92535	5.15717	37.7511	8.15464e-24	1.62553e-21	44.598	stable
Sfrs5	1.92306	6.40389	37.7497	8.16213e-24	1.62553e-21	44.5971	stable
Ikbke	1.9293	4.96226	37.4874	9.71184e-24	1.92082e-21	44.4222	stable
Aqp9	-2.56711	3.16233	-37.4702	9.8238e-24	1.92082e-21	44.4107	down
Rapsn	-1.88995	4.11902	-37.4687	9.83343e-24	1.92082e-21	44.4097	stable
2610510J17Rik	-2.00267	3.33782	-37.4595	9.89375e-24	1.92082e-21	44.4036	down
Gngt2	2.04761	6.32449	37.2911	1.10702e-23	2.13579e-21	44.2905	up
Etv1	-2.04283	3.20213	-37.1593	1.20912e-23	2.31827e-21	44.2017	down
E130306D19Rik	-2.14582	3.47696	-37.1157	1.24509e-23	2.3725e-21	44.1722	down
Optn	1.67318	4.18202	36.9549	1.38739e-23	2.62745e-21	44.0633	stable
Mreg	1.77344	4.15082	36.8907	1.44874e-23	2.72691e-21	44.0197	stable
Pif1	-2.08609	3.31296	-36.7526	1.59075e-23	2.97606e-21	43.9255	down
Mboat1	-1.75922	3.77609	-36.6937	1.6556e-23	3.07871e-21	43.8853	stable
Stac2	1.88433	4.41367	36.5556	1.81864e-23	3.36166e-21	43.7907	stable
E330036I19Rik	1.68215	8.11378	36.5034	1.88449e-23	3.46264e-21	43.7549	stable
Eno1	-1.82659	8.12137	-36.4291	1.98259e-23	3.6097e-21	43.7037	stable
Foxm1	-1.90635	3.36161	-36.4252	1.98791e-23	3.6097e-21	43.701	stable
Aldh18a1	-1.9369	4.41094	-36.3194	2.13727e-23	3.85821e-21	43.628	stable
Slc2a6	-1.90854	6.27979	-36.2888	2.18268e-23	3.91728e-21	43.6068	stable
Slc44a1	1.72628	4.04517	36.2627	2.22204e-23	3.96394e-21	43.5888	stable
Il10ra	1.69694	5.78795	36.2547	2.23436e-23	3.96394e-21	43.5832	stable
Rbmx	-1.81798	4.57633	-36.1865	2.34159e-23	4.13044e-21	43.536	stable
Cd83	2.20905	4.94007	36.1332	2.42918e-23	4.26059e-21	43.499	up
LOC100046844	2.10662	4.37752	35.8742	2.90565e-23	5.06749e-21	43.3184	up
Ccl5	1.79579	3.98343	35.803	3.05291e-23	5.29439e-21	43.2685	stable
LOC100038993	1.79021	3.0602	35.6812	3.32316e-23	5.73088e-21	43.183	stable
Dok2	-1.77789	5.79767	-35.6092	3.49455e-23	5.99295e-21	43.1322	stable
Smpdl3b	-1.92485	3.51665	-35.5363	3.67734e-23	6.2716e-21	43.0808	stable
Chtf18	-1.65857	3.39095	-35.483	3.81716e-23	6.47429e-21	43.0431	stable
Ccndbp1	1.72787	4.73452	35.4621	3.87356e-23	6.53404e-21	43.0283	stable
Zfp704	1.84488	4.14327	35.3842	4.09155e-23	6.84704e-21	42.9731	stable
LOC670044	-2.04223	3.13306	-35.3753	4.11733e-23	6.84704e-21	42.9667	down
Hist2h2ab	-3.0207	4.39337	-35.3724	4.12566e-23	6.84704e-21	42.9647	down
Gpr137b	2.54802	5.86215	35.3154	4.29467e-23	7.08943e-21	42.9242	up
Slc29a1	2.62701	3.4407	35.3008	4.33908e-23	7.12464e-21	42.9138	up
LOC100039742	1.60406	3.73184	35.2387	4.53336e-23	7.40424e-21	42.8696	stable
Kif11	-1.68563	2.93433	-35.1247	4.91376e-23	7.9833e-21	42.7882	stable
C1qa	1.81436	6.07359	34.9513	5.55736e-23	8.98168e-21	42.6639	stable
Tlr8	2.0535	4.40917	34.7633	6.35493e-23	1.02172e-20	42.5285	up
Soat2	-1.81273	2.7902	-34.7453	6.43753e-23	1.02964e-20	42.5154	stable
Shmt2	-1.98967	4.03084	-34.7355	6.48253e-23	1.03149e-20	42.5084	stable
EG667977	2.46396	6.6286	34.5855	7.21889e-23	1.14277e-20	42.3997	up
Mvk	-2.17861	3.32928	-34.5525	7.39243e-23	1.16427e-20	42.3757	down
Aacs	-1.71162	6.48318	-34.3181	8.75544e-23	1.37194e-20	42.2047	stable
D9Ertd392e	1.64558	6.13832	34.0447	1.068e-22	1.66505e-20	42.0038	stable
Pold2	-1.68435	4.47216	-34.0251	1.08339e-22	1.68056e-20	41.9893	stable
Sdc1	2.00785	3.14674	33.9953	1.10721e-22	1.70892e-20	41.9673	up
EG629383	1.66658	5.82227	33.9818	1.11819e-22	1.71728e-20	41.9573	stable
Gm1276	2.04654	3.5452	33.907	1.18114e-22	1.80335e-20	41.9019	up
Ddx5	2.22731	3.90961	33.9015	1.18592e-22	1.80335e-20	41.8978	up
Ltb4r1	-2.05173	3.50254	-33.8892	1.19666e-22	1.81077e-20	41.8887	down
Ddhd1	2.04145	3.50106	33.8621	1.22062e-22	1.83802e-20	41.8687	up
Tmod1	1.67154	3.80111	33.8484	1.23295e-22	1.84757e-20	41.8585	stable
Tyms	-1.67296	3.0343	-33.8196	1.25934e-22	1.878e-20	41.8371	stable
Gins2	-1.84055	4.32963	-33.7791	1.29738e-22	1.92542e-20	41.807	stable
Chaf1a	-2.08783	4.32604	-33.7606	1.31509e-22	1.94061e-20	41.7932	down
BC023744	1.59351	2.87473	33.7554	1.32019e-22	1.94061e-20	41.7893	stable
Hsd17b7	-1.9002	5.5482	-33.7177	1.3573e-22	1.9857e-20	41.7613	stable
Etv5	-2.0571	4.2282	-33.4813	1.61641e-22	2.35363e-20	41.5845	down
Slamf8	1.93004	4.93128	33.4683	1.63207e-22	2.36527e-20	41.5747	stable
scl0002624.1_576	-1.68502	3.99729	-33.3461	1.7872e-22	2.56668e-20	41.4828	stable
Ogt	1.70244	4.70933	33.3404	1.79477e-22	2.56668e-20	41.4785	stable
Cebpe	-1.92781	3.20236	-33.3395	1.79599e-22	2.56668e-20	41.4778	stable
LOC666559	-2.47127	5.57916	-33.3078	1.83891e-22	2.61591e-20	41.4539	down
S100a8	-1.94379	8.85098	-33.2207	1.96245e-22	2.77884e-20	41.3881	stable
Coro1a	-1.68514	8.04212	-33.1682	2.04088e-22	2.87671e-20	41.3484	stable
Dusp6	-2.14973	3.58403	-33.0169	2.28611e-22	3.20773e-20	41.2335	down
Gapt	-1.9651	3.5135	-32.8638	2.56552e-22	3.58348e-20	41.1167	stable
S100a4	-2.36672	5.31644	-32.8071	2.67772e-22	3.72335e-20	41.0734	down
Mgst2	-1.70715	3.2915	-32.7816	2.73001e-22	3.77904e-20	41.0538	stable
Kif23	-1.77018	5.75778	-32.7424	2.81222e-22	3.87547e-20	41.0237	stable
Srm	-1.9542	5.42375	-32.7223	2.85532e-22	3.91738e-20	41.0083	stable
Arl5c	1.84206	3.08552	32.6091	3.11147e-22	4.24991e-20	40.9212	stable
Scin	1.99012	3.19586	32.5681	3.21012e-22	4.36534e-20	40.8896	stable
Tcf19	-2.04291	3.06456	-32.4286	3.57058e-22	4.83423e-20	40.7817	down
Cyp4v3	1.49953	6.38242	32.3593	3.76506e-22	5.07527e-20	40.728	stable
Fcgrt	1.69185	6.63093	32.2825	3.99345e-22	5.35973e-20	40.6683	stable
9830002L24Rik	-1.52228	2.51834	-32.0966	4.60796e-22	6.15771e-20	40.5232	stable
Trem3	-1.86444	3.25695	-32.065	4.72188e-22	6.28274e-20	40.4984	stable
Fbxo32	2.03623	3.07072	32.0391	4.81728e-22	6.38217e-20	40.4781	up
Avpi1	-1.54776	3.39678	-32.0185	4.89479e-22	6.45715e-20	40.4619	stable
2210010N04Rik	1.54242	5.76586	31.9914	4.99853e-22	6.56594e-20	40.4406	stable
LOC238943	-1.93742	5.14614	-31.9693	5.08498e-22	6.6512e-20	40.4233	stable
Gprc5b	1.69435	5.57227	31.9353	5.22072e-22	6.79993e-20	40.3965	stable
Ndufs8	-1.48124	7.58461	-31.7889	5.8502e-22	7.58781e-20	40.281	stable
St3gal5	-1.78245	4.89305	-31.6875	6.33174e-22	8.17801e-20	40.2008	stable
Sell	-1.87277	3.25069	-31.6525	6.50743e-22	8.36991e-20	40.173	stable
Sgk1	1.8157	8.59635	31.6419	6.56149e-22	8.40443e-20	40.1646	stable
Cenpm	-1.67045	2.53119	-31.6286	6.63004e-22	8.45713e-20	40.1541	stable
Htr2b	1.72268	5.28244	31.6026	6.76655e-22	8.59575e-20	40.1334	stable
Mad2l1	-1.95966	3.66396	-31.5578	7.00823e-22	8.86627e-20	40.0978	stable
Lincr	1.87207	3.38996	31.4991	7.33906e-22	9.24692e-20	40.051	stable
3830430K15Rik	-1.81779	3.63074	-31.4386	7.69691e-22	9.65837e-20	40.0027	stable
Dgkg	-1.61125	2.77716	-31.4226	7.79432e-22	9.74101e-20	39.9899	stable
Pira11	1.86354	5.91633	31.1811	9.43449e-22	1.17433e-19	39.796	stable
Zranb3	-1.84549	5.896	-31.1444	9.71343e-22	1.20419e-19	39.7664	stable
Cdo1	1.87844	3.04335	31.0708	1.02988e-21	1.27166e-19	39.707	stable
Cenpn	-1.76543	2.88579	-31.0654	1.03429e-21	1.27202e-19	39.7027	stable
Ctsl	1.4505	3.79137	31.0137	1.07781e-21	1.32027e-19	39.6608	stable
Cenpi	-1.65799	2.99358	-31.0019	1.08806e-21	1.32756e-19	39.6512	stable
E130102H24Rik	1.66681	4.02922	30.9619	1.12337e-21	1.36525e-19	39.6188	stable
Ctps2	1.53221	3.31959	30.9033	1.17723e-21	1.42509e-19	39.5712	stable
Cenpa	-1.48449	7.34206	-30.8422	1.23626e-21	1.49071e-19	39.5215	stable
Ehd1	-1.43086	3.86377	-30.8198	1.25873e-21	1.5119e-19	39.5032	stable
Hbb-b1	-1.68593	2.72339	-30.7537	1.32737e-21	1.58816e-19	39.4493	stable
Gins1	-1.67055	3.92486	-30.7177	1.36635e-21	1.62848e-19	39.4199	stable
AI607873	1.5319	7.36966	30.7058	1.37954e-21	1.63789e-19	39.4101	stable
E030020A01Rik	1.94985	5.71918	30.6755	1.41362e-21	1.6683e-19	39.3853	stable
Cd22	1.81987	3.00973	30.6734	1.41596e-21	1.6683e-19	39.3836	stable
Bub1b	-1.91064	4.94959	-30.6306	1.46571e-21	1.72034e-19	39.3485	stable
Sgol2	-2.02585	3.34332	-30.6236	1.47405e-21	1.72357e-19	39.3428	down
4732429D16Rik	1.57476	6.06835	30.5897	1.515e-21	1.76478e-19	39.3149	stable
Mcm10	-1.73969	2.73832	-30.5803	1.52649e-21	1.77147e-19	39.3073	stable
Spc25	-1.90255	3.50305	-30.55	1.56436e-21	1.80863e-19	39.2823	stable
Hsd11b1	-1.68299	2.80606	-30.5415	1.57512e-21	1.81427e-19	39.2754	stable
Tgif1	1.50168	3.74596	30.4278	1.72735e-21	1.97966e-19	39.1816	stable
Atp6ap2	1.83343	6.02446	30.4248	1.73154e-21	1.97966e-19	39.1792	stable
Slc1a4	-1.57434	2.8244	-30.4168	1.7428e-21	1.98519e-19	39.1726	stable
Sema4d	2.01596	4.89961	30.3752	1.80279e-21	2.04597e-19	39.1382	up
Eya1	1.77934	4.61597	30.3319	1.86751e-21	2.11165e-19	39.1023	stable
Adam17	1.44688	5.35933	30.305	1.90883e-21	2.15049e-19	39.0801	stable
2210404O07Rik	1.72792	3.77222	30.248	1.99974e-21	2.24092e-19	39.0328	stable
Ccne2	-1.52097	2.44617	-30.2456	2.00361e-21	2.24092e-19	39.0308	stable
Pnpla7	1.46601	5.87205	30.1969	2.0851e-21	2.32364e-19	38.9903	stable
4833427B12Rik	-1.71365	4.09099	-30.0923	2.27165e-21	2.52243e-19	38.9032	stable
Arl5a	1.50366	4.40654	30.0696	2.31438e-21	2.56067e-19	38.8842	stable
LOC381691	1.5787	4.5466	30.0284	2.39418e-21	2.6395e-19	38.8497	stable
Nup43	-1.56552	4.39881	-29.9754	2.50075e-21	2.74718e-19	38.8055	stable
Kntc1	-1.66026	3.03918	-29.9438	2.56692e-21	2.80987e-19	38.7789	stable
Fbxo3	1.46833	5.00867	29.8884	2.68694e-21	2.93086e-19	38.7324	stable
Rpl22	1.58927	5.16688	29.8826	2.69975e-21	2.93445e-19	38.7276	stable
H2-T10	1.63541	4.50539	29.8722	2.72314e-21	2.94949e-19	38.7188	stable
F730045P10Rik	1.60005	4.7267	29.8491	2.7757e-21	2.99592e-19	38.6994	stable
Selp	-1.43938	3.35801	-29.8209	2.8411e-21	3.05582e-19	38.6757	stable
1190002A17Rik	1.39412	3.62304	29.7562	2.99782e-21	3.21319e-19	38.6211	stable
Scd2	-2.52079	4.11549	-29.7163	3.09863e-21	3.30975e-19	38.5874	down
Psmc3ip	-1.80307	3.7784	-29.6752	3.20635e-21	3.41299e-19	38.5527	stable
Apitd1	-1.55912	3.35956	-29.6484	3.27869e-21	3.47801e-19	38.53	stable
Dhcr24	-2.28684	3.44631	-29.5673	3.50801e-21	3.70852e-19	38.4612	down
Lgals3bp	1.421	8.44725	29.5388	3.59239e-21	3.78476e-19	38.437	stable
Rasa4	1.76696	5.20134	29.4589	3.84069e-21	4.03259e-19	38.369	stable
C030003H22Rik	1.33064	3.23456	29.4255	3.94987e-21	4.13318e-19	38.3405	stable
2310001H17Rik	2.01972	4.42448	29.4133	3.99027e-21	4.16134e-19	38.3301	up
Alox5	-1.61939	2.88402	-29.3267	4.29124e-21	4.46015e-19	38.2561	stable
Ccnl	1.79106	3.59249	29.2743	4.4851e-21	4.64599e-19	38.2111	stable
Hivep3	1.48602	4.42357	29.2509	4.57439e-21	4.72264e-19	38.1911	stable
LOC333331	1.48725	4.97989	29.2172	4.70606e-21	4.84238e-19	38.1622	stable
Adora2b	-1.36615	3.87898	-29.1999	4.77547e-21	4.89748e-19	38.1473	stable
4632428N05Rik	1.65809	5.64537	29.1788	4.86125e-21	4.96244e-19	38.1292	stable
Adrb2	-1.75898	4.68346	-29.1764	4.87097e-21	4.96244e-19	38.1271	stable
Slco2b1	1.63056	4.35302	29.1453	5.00094e-21	5.07809e-19	38.1003	stable
Ppap2b	1.47	3.37327	29.1302	5.06545e-21	5.12674e-19	38.0873	stable
Dgat2	-1.60659	2.57358	-29.086	5.25838e-21	5.3046e-19	38.0492	stable
Cdc7	-1.63119	4.14008	-28.9748	5.77941e-21	5.81122e-19	37.953	stable
A630077B13Rik	1.4848	3.49226	28.9527	5.88924e-21	5.90243e-19	37.9339	stable
6330509M05Rik	1.52865	5.02782	28.9318	5.99463e-21	5.98862e-19	37.9158	stable
Adcy2	1.63184	3.01231	28.9094	6.11053e-21	6.07068e-19	37.8963	stable
44256	1.4978	3.84734	28.9083	6.11611e-21	6.07068e-19	37.8954	stable
EG667728	-1.52065	9.29037	-28.755	6.97206e-21	6.89809e-19	37.762	stable
Mag	1.44325	4.24453	28.6671	7.51856e-21	7.41503e-19	37.6851	stable
D17H6S56E-5	-1.64854	3.30761	-28.6486	7.63925e-21	7.51007e-19	37.6689	stable
Ephx1	1.38031	5.52994	28.6202	7.82808e-21	7.67127e-19	37.644	stable
Pparg	1.336	6.58496	28.5971	7.98492e-21	7.80021e-19	37.6238	stable
Itpr3	-1.43992	3.56012	-28.5924	8.01751e-21	7.80733e-19	37.6197	stable
Cdkn2d	-1.61874	4.49236	-28.5503	8.31421e-21	8.0708e-19	37.5826	stable
Klra3	1.7345	3.81866	28.5274	8.47985e-21	8.20578e-19	37.5625	stable
Mvd	-1.39461	5.84045	-28.5207	8.52908e-21	8.22763e-19	37.5566	stable
Cpe	1.53971	2.96012	28.5099	8.60914e-21	8.27899e-19	37.5471	stable
LOC100048807	-1.37218	3.17911	-28.448	9.0824e-21	8.70698e-19	37.4926	stable
F630038O13Rik	1.42102	2.95722	28.3691	9.72486e-21	9.29401e-19	37.423	stable
Pacrg	1.57918	4.52951	28.3541	9.85281e-21	9.38723e-19	37.4097	stable
Tmem48	-1.55593	4.29005	-28.3247	1.01077e-20	9.60046e-19	37.3836	stable
A130070G01Rik	1.45404	4.82912	28.2828	1.04827e-20	9.89586e-19	37.3465	stable
Slc46a3	1.37522	7.78306	28.2828	1.04828e-20	9.89586e-19	37.3465	stable
Oip5	-1.33928	2.84555	-28.254	1.07492e-20	1.01164e-18	37.3209	stable
Use1	1.31831	5.54685	28.1214	1.2068e-20	1.1323e-18	37.203	stable
LOC241385	2.48164	6.00534	28.0983	1.23149e-20	1.15196e-18	37.1823	up
LOC667370	1.48483	3.01206	28.0301	1.30729e-20	1.21918e-18	37.1214	stable
2310007D09Rik	-1.59939	2.39168	-28.0027	1.33919e-20	1.24517e-18	37.0969	stable
E130012A19Rik	-1.43316	3.21337	-27.9591	1.39149e-20	1.28991e-18	37.0578	stable
Gnpda1	1.84808	5.22084	27.9527	1.39935e-20	1.29331e-18	37.0521	stable
Grhpr	-1.51001	4.2133	-27.9458	1.40793e-20	1.29735e-18	37.0458	stable
Cenpq	-1.70619	2.92343	-27.9308	1.42657e-20	1.30761e-18	37.0324	stable
6430706D22Rik	-1.59539	5.43697	-27.93	1.42753e-20	1.30761e-18	37.0317	stable
Pold1	-1.81177	5.25676	-27.7962	1.60652e-20	1.46721e-18	36.9113	stable
Aif1	1.65275	6.0939	27.787	1.61969e-20	1.47487e-18	36.903	stable
Abcb6	-1.41261	4.42052	-27.7665	1.64935e-20	1.49747e-18	36.8845	stable
C530028O21Rik	1.69427	2.75467	27.7564	1.66417e-20	1.50649e-18	36.8754	stable
Smad3	1.48497	4.71713	27.6947	1.75778e-20	1.58658e-18	36.8196	stable
Ptp4a2	1.37629	5.33473	27.6757	1.78765e-20	1.60883e-18	36.8024	stable
LOC381524	1.44339	3.07321	27.6705	1.79601e-20	1.61166e-18	36.7976	stable
Dhcr7	-1.44168	4.27405	-27.6456	1.83617e-20	1.64292e-18	36.7751	stable
Fcgr2b	1.59479	6.4748	27.6111	1.89332e-20	1.68916e-18	36.7438	stable
Trib3	-2.09129	4.55569	-27.5147	2.06331e-20	1.83551e-18	36.6561	down
LOC381269	1.22411	2.558	27.4005	2.2852e-20	2.02707e-18	36.5519	stable
Mll1	1.41209	6.07823	27.3804	2.3269e-20	2.05814e-18	36.5335	stable
Dyrk3	-1.36972	2.89209	-27.3623	2.36493e-20	2.0858e-18	36.5169	stable
Slc24a3	-1.43143	3.82486	-27.3086	2.48192e-20	2.18275e-18	36.4677	stable
Rbm38	-1.73944	4.23226	-27.2624	2.5873e-20	2.26896e-18	36.4253	stable
Mospd1	1.44907	3.5452	27.2501	2.61608e-20	2.2877e-18	36.414	stable
Csf2rb2	1.45824	4.96082	27.2293	2.66555e-20	2.32437e-18	36.3949	stable
Siat9	-1.28987	3.65264	-27.2136	2.70375e-20	2.35105e-18	36.3803	stable
5730469M10Rik	1.32115	6.23773	27.1902	2.76148e-20	2.39122e-18	36.3588	stable
Prei4	1.8912	2.73095	27.1886	2.76545e-20	2.39122e-18	36.3573	stable
LOC100047264	1.37219	2.61374	27.1787	2.79014e-20	2.40584e-18	36.3483	stable
Atp2b1	1.41841	5.05045	27.1433	2.88086e-20	2.47714e-18	36.3156	stable
Cd177	-1.46282	2.70206	-27.1306	2.91433e-20	2.49628e-18	36.3038	stable
Chac1	-1.37265	4.82122	-27.1271	2.92357e-20	2.49628e-18	36.3006	stable
Lhfpl2	1.2658	8.9315	27.1256	2.92738e-20	2.49628e-18	36.2993	stable
Gabarapl1	1.65436	6.6285	27.1087	2.97248e-20	2.52776e-18	36.2837	stable
LOC100048554	1.34943	2.4904	26.9889	3.31408e-20	2.81051e-18	36.1726	stable
Lrg1	-1.40085	2.83052	-26.9796	3.34224e-20	2.82662e-18	36.164	stable
Cfl1	-1.48705	4.72588	-26.9713	3.36756e-20	2.84025e-18	36.1563	stable
0610037M15Rik	1.61174	3.38859	26.9624	3.39501e-20	2.85561e-18	36.148	stable
Zfp276	-1.39031	2.42228	-26.9316	3.49154e-20	2.92882e-18	36.1194	stable
LOC269515	-1.34731	3.73883	-26.8626	3.71828e-20	3.11056e-18	36.0552	stable
LOC100045343	-1.38183	5.37193	-26.8198	3.86676e-20	3.22603e-18	36.0152	stable
EG277333	-1.61149	4.64734	-26.7955	3.95363e-20	3.28326e-18	35.9925	stable
Zfp36l1	1.32205	5.13928	26.7945	3.95713e-20	3.28326e-18	35.9916	stable
2610035D17Rik	1.35723	3.51201	26.7917	3.96727e-20	3.28326e-18	35.989	stable
2810410P22Rik	1.49844	4.43991	26.7728	4.03652e-20	3.33164e-18	35.9714	stable
Raet1b	-1.41064	2.88304	-26.739	4.1636e-20	3.41962e-18	35.9397	stable
Stap1	1.50222	4.89834	26.7386	4.16526e-20	3.41962e-18	35.9393	stable
Tm7sf4	1.41916	2.89763	26.7162	4.25189e-20	3.48147e-18	35.9183	stable
Gp5	-1.49181	4.3307	-26.7049	4.29596e-20	3.50826e-18	35.9078	stable
St5	1.46945	3.33634	26.6604	4.47568e-20	3.64538e-18	35.8659	stable
Vnn3	1.37809	2.63575	26.6129	4.67558e-20	3.79817e-18	35.8213	stable
Slpi	-1.32915	5.3174	-26.5917	4.76797e-20	3.86306e-18	35.8013	stable
Rpl38	-1.2614	6.12073	-26.5591	4.91316e-20	3.97027e-18	35.7707	stable
A730089E01Rik	1.32657	2.91458	26.5387	5.00676e-20	4.03535e-18	35.7514	stable
Phlda1	-1.2654	3.27768	-26.509	5.14622e-20	4.13694e-18	35.7234	stable
Rnf114	1.62292	4.52454	26.4245	5.56532e-20	4.46223e-18	35.6434	stable
LOC433943	1.65263	6.42135	26.364	5.88647e-20	4.7075e-18	35.5861	stable
Rora	1.33608	3.69733	26.3305	6.07293e-20	4.84407e-18	35.5543	stable
Oxa1l	1.22748	4.98408	26.3003	6.2459e-20	4.96919e-18	35.5256	stable
Ebi2	-1.66867	4.41022	-26.2609	6.48013e-20	5.14229e-18	35.488	stable
LOC236604	1.29539	3.76666	26.2502	6.54501e-20	5.18046e-18	35.4778	stable
Hbp1	1.23681	7.29008	26.2326	6.65359e-20	5.25293e-18	35.461	stable
Kcnab2	-1.45033	7.49815	-26.2268	6.68922e-20	5.26759e-18	35.4556	stable
Pdss1	-1.38736	3.12851	-26.208	6.80819e-20	5.34764e-18	35.4376	stable
Gdpd1	1.27657	6.3886	26.1889	6.93069e-20	5.42809e-18	35.4194	stable
Ier3	-1.24188	5.63398	-26.1866	6.94579e-20	5.42809e-18	35.4171	stable
Ssr2	-1.24475	6.90422	-26.1836	6.96483e-20	5.42922e-18	35.4143	stable
LOC674135	1.79411	8.29457	26.1576	7.13661e-20	5.54912e-18	35.3894	stable
Rala	1.39833	4.283	26.1489	7.1951e-20	5.58054e-18	35.3811	stable
Tmem82	1.31288	4.85656	26.1268	7.34539e-20	5.68283e-18	35.36	stable
Lyrm5	1.48627	5.38174	26.0796	7.67813e-20	5.9254e-18	35.3147	stable
Pea15a	1.23467	5.18621	26.0672	7.76812e-20	5.97991e-18	35.3028	stable
Mst1r	1.28542	2.50571	26.0484	7.90654e-20	6.07132e-18	35.2848	stable
Nbr1	1.4697	3.45634	25.9823	8.41433e-20	6.44521e-18	35.2212	stable
Gale	-1.51633	3.50681	-25.9208	8.91692e-20	6.81328e-18	35.1619	stable
Hmgn3	-1.26405	5.89615	-25.9	9.09313e-20	6.92587e-18	35.1419	stable
Ralgds	1.66927	2.79827	25.8982	9.10915e-20	6.92587e-18	35.1401	stable
Pgcp	1.43229	4.23351	25.8916	9.16592e-20	6.95191e-18	35.1338	stable
Parvg	-1.56915	4.82773	-25.8783	9.28225e-20	7.02289e-18	35.1209	stable
Daglb	1.57144	3.34696	25.8588	9.45521e-20	7.13626e-18	35.102	stable
Gadd45g	1.87741	4.66216	25.852	9.51577e-20	7.16445e-18	35.0955	stable
LOC382092	-1.25569	8.81669	-25.8397	9.62748e-20	7.2282e-18	35.0836	stable
Aplp2	1.22141	8.87786	25.8375	9.64728e-20	7.2282e-18	35.0815	stable
Timm8a1	-1.20833	5.78857	-25.8169	9.83774e-20	7.35306e-18	35.0615	stable
Enc1	1.43359	4.56659	25.8098	9.90433e-20	7.38494e-18	35.0546	stable
Slc11a2	1.16526	5.08211	25.786	1.01303e-19	7.53107e-18	35.0316	stable
Nrm	-1.30238	5.1773	-25.784	1.01491e-19	7.53107e-18	35.0297	stable
Esco2	-1.67154	2.7219	-25.7759	1.02282e-19	7.57153e-18	35.0217	stable
Spry3	1.40432	3.21843	25.7493	1.04892e-19	7.7462e-18	34.996	stable
Rab27a	-1.32611	3.5141	-25.7355	1.06283e-19	7.83019e-18	34.9825	stable
LOC383942	1.12676	6.18138	25.7219	1.0766e-19	7.91277e-18	34.9694	stable
Chd3	1.57917	4.39281	25.6999	1.09944e-19	8.06143e-18	34.9479	stable
9430029K10Rik	-1.37225	6.84756	-25.6643	1.13736e-19	8.3197e-18	34.9132	stable
4930438D12Rik	1.22428	5.97674	25.6589	1.14319e-19	8.3426e-18	34.908	stable
4831403C07Rik	1.23416	4.19832	25.637	1.16728e-19	8.49832e-18	34.8867	stable
Mthfd2	-1.39798	7.13151	-25.6193	1.1872e-19	8.62296e-18	34.8694	stable
EG433016	-1.69588	2.43472	-25.6121	1.19537e-19	8.66196e-18	34.8624	stable
Rnase6	-1.49588	3.1111	-25.5983	1.21128e-19	8.75668e-18	34.8489	stable
Ncoa4	1.43913	3.70172	25.5907	1.22008e-19	8.7997e-18	34.8415	stable
C1qc	1.18009	9.12141	25.5677	1.24719e-19	8.97425e-18	34.819	stable
Fbln2	1.40575	2.51601	25.5462	1.27311e-19	9.13946e-18	34.798	stable
Lsm2	-1.37596	5.80974	-25.5368	1.28465e-19	9.20086e-18	34.7888	stable
1190002F15Rik	-1.48358	2.74052	-25.532	1.29058e-19	9.22197e-18	34.7841	stable
Csf2ra	1.20239	6.86872	25.5279	1.29564e-19	9.23674e-18	34.7801	stable
Mamdc2	1.9006	3.15652	25.4856	1.34917e-19	9.59619e-18	34.7387	stable
Recql4	-1.34646	2.60977	-25.4811	1.35508e-19	9.61611e-18	34.7342	stable
F2rl3	-1.5208	2.8233	-25.431	1.4219e-19	1.00513e-17	34.685	stable
Hspd1	1.86312	4.33433	25.4302	1.42292e-19	1.00513e-17	34.6843	stable
Emilin2	-1.37323	6.55586	-25.4067	1.45541e-19	1.02364e-17	34.6612	stable
Stmn1	-1.57908	3.35205	-25.4065	1.45575e-19	1.02364e-17	34.661	stable
Ppa1	-1.27276	6.21961	-25.3041	1.60677e-19	1.12726e-17	34.56	stable
Csrp2	-1.37787	4.38056	-25.2912	1.62689e-19	1.13879e-17	34.5473	stable
D030063E12	1.30164	4.05591	25.2795	1.64542e-19	1.14915e-17	34.5357	stable
1810020C02Rik	-1.14943	4.20722	-25.2726	1.65646e-19	1.15425e-17	34.5289	stable
Pcyox1l	-1.46806	3.10132	-25.2648	1.6689e-19	1.1603e-17	34.5213	stable
E030038D23Rik	1.36017	3.62825	25.2466	1.69863e-19	1.17831e-17	34.5032	stable
1700052O22Rik	1.37891	6.44246	25.2425	1.70527e-19	1.18027e-17	34.4992	stable
AW548124	1.35017	3.74466	25.2397	1.70989e-19	1.18082e-17	34.4965	stable
Ang	-1.24207	5.17743	-25.235	1.71775e-19	1.1836e-17	34.4918	stable
Asf1b	-1.63032	3.5541	-25.2125	1.75554e-19	1.20694e-17	34.4695	stable
Acp2	1.49611	6.60437	25.1949	1.78585e-19	1.22505e-17	34.452	stable
As3mt	1.43978	3.64345	25.1842	1.80448e-19	1.23509e-17	34.4414	stable
Icam2	-1.33513	3.86117	-25.026	2.10472e-19	1.43741e-17	34.284	stable
Tspan7	1.61215	3.23786	24.9964	2.1664e-19	1.47626e-17	34.2545	stable
Tnfsf9	-1.41369	2.5306	-24.9845	2.19161e-19	1.49015e-17	34.2426	stable
Rab15	-1.20155	2.84902	-24.9752	2.21163e-19	1.50046e-17	34.2333	stable
Chaf1b	-1.3463	4.58764	-24.886	2.41354e-19	1.63385e-17	34.144	stable
Pcdhgb4	-1.28306	2.89674	-24.879	2.43018e-19	1.64152e-17	34.1369	stable
Tubb2c	-1.34629	7.27486	-24.848	2.50517e-19	1.68847e-17	34.1059	stable
Dlgap5	-1.4594	2.58912	-24.8392	2.52683e-19	1.69598e-17	34.0971	stable
Ctsa	1.8295	6.80555	24.839	2.52749e-19	1.69598e-17	34.0968	stable
Gclm	-1.26025	6.79903	-24.8368	2.53279e-19	1.69598e-17	34.0946	stable
Tmcc1	1.42823	4.32032	24.7908	2.65023e-19	1.76979e-17	34.0483	stable
Taz	1.38	4.54937	24.7891	2.65448e-19	1.76979e-17	34.0466	stable
Csda	-1.51766	3.06819	-24.778	2.68367e-19	1.78539e-17	34.0355	stable
Cenpp	-1.21143	2.78525	-24.7265	2.82345e-19	1.87434e-17	33.9835	stable
Pdgfb	1.31195	4.83016	24.6953	2.91163e-19	1.92874e-17	33.9521	stable
Ak3l1	-1.15865	2.57896	-24.6538	3.03365e-19	2.00526e-17	33.9101	stable
Golga4	1.31031	3.9261	24.6272	3.11462e-19	2.05438e-17	33.8831	stable
Pigz	1.21293	4.16252	24.5981	3.20571e-19	2.10996e-17	33.8536	stable
AW544981	1.22824	3.43683	24.5845	3.24916e-19	2.13401e-17	33.8398	stable
Acpl2	-1.21445	3.65192	-24.5621	3.32234e-19	2.17744e-17	33.817	stable
Apobec1	1.3562	7.04251	24.5494	3.3643e-19	2.20026e-17	33.8042	stable
C430015A10Rik	1.32913	4.15754	24.5439	3.38266e-19	2.2076e-17	33.7986	stable
Gyg	1.57627	6.54248	24.5223	3.45615e-19	2.2508e-17	33.7766	stable
Kif13b	1.20104	4.55107	24.5146	3.48284e-19	2.26154e-17	33.7688	stable
Slamf9	-1.47665	4.87109	-24.5133	3.48729e-19	2.26154e-17	33.7675	stable
Taf9b	1.24119	3.93909	24.4946	3.55282e-19	2.2992e-17	33.7484	stable
LOC676389	1.27234	3.9735	24.4727	3.63097e-19	2.34486e-17	33.7262	stable
Ube2m	-1.19437	5.6142	-24.4697	3.642e-19	2.34707e-17	33.7231	stable
Gripap1	1.18474	6.49288	24.4507	3.71141e-19	2.38683e-17	33.7037	stable
Aph1c	1.4297	2.69946	24.3641	4.04661e-19	2.59698e-17	33.6153	stable
LOC677317	-1.44351	3.41083	-24.3393	4.14826e-19	2.65608e-17	33.5899	stable
Caskin2	-1.19818	3.03693	-24.3375	4.1559e-19	2.65608e-17	33.588	stable
Brip1	-1.19898	2.65434	-24.2882	4.3663e-19	2.78478e-17	33.5374	stable
Mrpl54	-1.31671	6.96468	-24.2579	4.50131e-19	2.85985e-17	33.5063	stable
Rragd	1.18178	4.76744	24.2576	4.50253e-19	2.85985e-17	33.506	stable
LOC100045617	1.10043	6.23483	24.2114	4.71635e-19	2.98951e-17	33.4585	stable
Hyi	1.28646	4.92383	24.2049	4.74727e-19	3.00294e-17	33.4518	stable
Mcm3	-1.19626	4.16133	-24.1884	4.82664e-19	3.04628e-17	33.4348	stable
Cd300lb	1.35794	3.92759	24.1866	4.83552e-19	3.04628e-17	33.433	stable
Dleu2	1.36799	3.88756	24.1841	4.84765e-19	3.0477e-17	33.4304	stable
Copg	-1.31016	3.35235	-24.1794	4.87098e-19	3.05615e-17	33.4255	stable
Ptgds2	1.36819	5.59559	24.1658	4.93819e-19	3.09203e-17	33.4115	stable
Gdi1	1.55969	3.76695	24.1168	5.18799e-19	3.24186e-17	33.3609	stable
Mrps28	-1.31624	5.62681	-24.0834	5.36625e-19	3.34648e-17	33.3264	stable
Arhgap30	1.33301	4.05428	24.0775	5.39818e-19	3.3596e-17	33.3203	stable
Bgn	1.36253	4.28828	24.063	5.47774e-19	3.40226e-17	33.3053	stable
Anpep	1.26714	8.17934	24.0281	5.6752e-19	3.51783e-17	33.2691	stable
Pcdhgc5	-1.17287	2.86972	-23.966	6.04355e-19	3.73865e-17	33.2047	stable
1110029L17Rik	1.38328	6.64423	23.9596	6.0835e-19	3.75038e-17	33.1979	stable
Ets2	-1.32557	5.90268	-23.959	6.08681e-19	3.75038e-17	33.1974	stable
D230048P18Rik	1.45685	4.3633	23.9512	6.13546e-19	3.77282e-17	33.1892	stable
Rnf128	1.49838	4.34578	23.8804	6.59338e-19	4.04634e-17	33.1155	stable
Hist1h1c	1.25327	8.46678	23.8355	6.90251e-19	4.22651e-17	33.0686	stable
Map3k8	1.35755	4.53817	23.8338	6.91434e-19	4.22651e-17	33.0669	stable
Upp1	-1.13567	3.00352	-23.8095	7.08785e-19	4.32401e-17	33.0415	stable
Pira4	1.34086	6.93151	23.797	7.17881e-19	4.37086e-17	33.0284	stable
2500002L14Rik	1.3686	5.07422	23.7947	7.19612e-19	4.37277e-17	33.026	stable
Glrx	-1.18683	7.45321	-23.7277	7.70654e-19	4.67274e-17	32.9558	stable
Marco	-1.38296	3.40959	-23.7245	7.73172e-19	4.67274e-17	32.9525	stable
Gpr68	1.3897	3.2314	23.7241	7.73518e-19	4.67274e-17	32.952	stable
Dars	1.28285	5.52139	23.6698	8.17846e-19	4.93018e-17	32.8949	stable
Adam33	1.21519	2.50886	23.668	8.19328e-19	4.93018e-17	32.8931	stable
LOC100045877	-1.14794	2.63176	-23.6588	8.27163e-19	4.96765e-17	32.8833	stable
Cdkn2c	1.32004	3.20431	23.6351	8.47535e-19	5.08011e-17	32.8584	stable
Xpr1	1.17583	5.99992	23.6161	8.64282e-19	5.17045e-17	32.8384	stable
Pdlim1	-1.24791	3.99717	-23.6094	8.70246e-19	5.19606e-17	32.8313	stable
St3gal6	-1.2841	2.59612	-23.5927	8.85302e-19	5.27575e-17	32.8138	stable
Fstl1	1.29421	2.72074	23.5786	8.98285e-19	5.34281e-17	32.7989	stable
Il1b	-1.25945	2.81116	-23.5405	9.34263e-19	5.53754e-17	32.7586	stable
Tpx2	-1.4169	3.02493	-23.5402	9.34614e-19	5.53754e-17	32.7583	stable
scl000292.1_12	1.16078	4.96343	23.5217	9.52609e-19	5.63335e-17	32.7387	stable
2410006H16Rik	1.35194	4.52537	23.5132	9.60984e-19	5.67201e-17	32.7298	stable
Myo5a	1.40706	5.96048	23.4766	9.9802e-19	5.87937e-17	32.691	stable
Cxcr4	1.8763	5.98587	23.4497	1.02625e-18	6.03414e-17	32.6625	stable
Hpcal1	1.30872	3.70249	23.4462	1.03001e-18	6.04478e-17	32.6587	stable
Klhl9	1.2643	4.25532	23.4247	1.05323e-18	6.16926e-17	32.6359	stable
Ankrd37	-1.23183	2.35214	-23.391	1.0907e-18	6.37665e-17	32.6001	stable
Rilpl2	1.26357	8.0067	23.3886	1.09333e-18	6.37996e-17	32.5976	stable
Cox6a2	-1.25858	4.52467	-23.3796	1.10366e-18	6.42809e-17	32.588	stable
Hirip3	-1.38068	4.12274	-23.3476	1.14092e-18	6.6326e-17	32.554	stable
1500041B16Rik	1.08803	4.38861	23.3388	1.15149e-18	6.68144e-17	32.5445	stable
Gmds	-1.45113	4.30197	-23.3157	1.17945e-18	6.83085e-17	32.5199	stable
Tcirg1	1.93431	5.01679	23.299	1.20019e-18	6.93794e-17	32.5021	stable
Cdca7	-1.17895	6.14667	-23.2801	1.22398e-18	7.06226e-17	32.482	stable
LOC637711	-1.54848	3.95019	-23.2623	1.24703e-18	7.18183e-17	32.4629	stable
D12Ertd553e	1.34061	5.97537	23.2532	1.25882e-18	7.23622e-17	32.4532	stable
2610021K21Rik	-1.2788	2.23367	-23.2351	1.28295e-18	7.36121e-17	32.4338	stable
EG630499	1.04325	9.30696	23.2207	1.30231e-18	7.45846e-17	32.4184	stable
1700025G04Rik	-1.10301	4.08074	-23.2083	1.31939e-18	7.54228e-17	32.4051	stable
F630043A04Rik	-1.49872	2.57429	-23.1974	1.33449e-18	7.59577e-17	32.3934	stable
Prkcb	1.11548	6.39298	23.1968	1.33528e-18	7.59577e-17	32.3928	stable
Dnajb6	1.29327	5.82883	23.1962	1.33613e-18	7.59577e-17	32.3922	stable
Trafd1	1.56557	4.16034	23.1322	1.42873e-18	8.10569e-17	32.3235	stable
Dtymk	-1.09645	4.61483	-23.1307	1.43108e-18	8.10569e-17	32.3218	stable
scl000528.1_16	1.29846	3.96435	23.1096	1.4631e-18	8.27185e-17	32.2992	stable
H2-Q6	1.36425	3.45315	23.1071	1.46696e-18	8.27851e-17	32.2965	stable
LOC269859	1.23447	3.76677	23.1016	1.47541e-18	8.31104e-17	32.2906	stable
Phf19	-1.32568	2.85032	-23.0988	1.47969e-18	8.31996e-17	32.2876	stable
Irgm1	1.26943	4.69659	23.0967	1.48307e-18	8.32381e-17	32.2853	stable
Uchl1	-1.14978	3.1947	-23.0855	1.50062e-18	8.407e-17	32.2732	stable
Gnaz	-1.41106	3.20549	-23.0737	1.51927e-18	8.49608e-17	32.2606	stable
Rsad2	1.16495	5.05516	23.0559	1.54792e-18	8.64067e-17	32.2414	stable
Unc93b1	1.87518	5.97813	23.0517	1.55482e-18	8.66351e-17	32.2369	stable
Lmnb2	-1.34045	4.27986	-23.0391	1.57553e-18	8.76305e-17	32.2233	stable
Gp1bb	-1.84453	3.66101	-23.0105	1.62375e-18	9.01501e-17	32.1924	stable
Cdca5	-1.41866	3.35955	-22.9693	1.69581e-18	9.39817e-17	32.1479	stable
Arl10c	1.08713	5.78801	22.9532	1.7249e-18	9.54226e-17	32.1305	stable
Slc2a3	-1.32477	4.60653	-22.9477	1.73498e-18	9.5809e-17	32.1245	stable
Ptafr	1.09714	3.82489	22.8924	1.83946e-18	1.01397e-16	32.0646	stable
Slc27a6	1.13092	3.25817	22.8907	1.84279e-18	1.014e-16	32.0627	stable
Tnfaip8l2	1.15938	5.74486	22.8657	1.89233e-18	1.0394e-16	32.0356	stable
Gamt	-1.13704	4.91416	-22.8616	1.90048e-18	1.04202e-16	32.0312	stable
Siva1	-1.25056	6.7084	-22.8434	1.9376e-18	1.06049e-16	32.0113	stable
Mtif2	1.05608	4.36921	22.8399	1.9448e-18	1.06255e-16	32.0075	stable
Ifit3	1.343	3.05422	22.8011	2.02668e-18	1.10533e-16	31.9653	stable
4831426I19Rik	-1.2617	3.50283	-22.7826	2.06677e-18	1.1252e-16	31.9452	stable
Lbcl1	1.09594	4.95954	22.7573	2.12324e-18	1.15391e-16	31.9176	stable
AB124611	1.23765	4.97084	22.738	2.16736e-18	1.17582e-16	31.8965	stable
Cyp4f13	1.40956	5.16373	22.6858	2.29148e-18	1.24098e-16	31.8394	stable
Slc35c2	-1.181	6.54341	-22.6676	2.33622e-18	1.26299e-16	31.8196	stable
Thoc6	-1.15313	5.37915	-22.6576	2.36134e-18	1.27434e-16	31.8086	stable
LOC626309	1.00354	7.80515	22.6097	2.48561e-18	1.33907e-16	31.7561	stable
Mfsd11	1.50642	5.81527	22.584	2.55498e-18	1.37403e-16	31.7279	stable
Spic	1.04161	2.50712	22.5806	2.56426e-18	1.37663e-16	31.7241	stable
Egr1	1.1156	3.59641	22.5676	2.60035e-18	1.39358e-16	31.7098	stable
Bdh2	-1.10668	4.75575	-22.5555	2.63417e-18	1.40926e-16	31.6966	stable
H2-T23	1.72154	6.63734	22.5476	2.65671e-18	1.41886e-16	31.6878	stable
Cst7	-1.44133	2.69287	-22.5188	2.74024e-18	1.46094e-16	31.6561	stable
Rpl23	1.24056	6.17282	22.5089	2.76941e-18	1.47395e-16	31.6452	stable
Id3	-1.72469	3.32581	-22.5014	2.79204e-18	1.48343e-16	31.6369	stable
Ifitm6	-1.448	3.75763	-22.4978	2.8029e-18	1.48665e-16	31.6329	stable
Rangrf	-1.13256	3.77448	-22.4851	2.84128e-18	1.50442e-16	31.619	stable
Piwil2	-1.00012	2.80838	-22.4811	2.85353e-18	1.50832e-16	31.6146	stable
4733401I05Rik	-1.21761	3.99548	-22.478	2.86315e-18	1.51082e-16	31.6111	stable
Pla2g15	1.19449	8.72027	22.4307	3.01291e-18	1.58713e-16	31.5589	stable
LOC100041194	1.77092	4.13844	22.4214	3.04323e-18	1.60036e-16	31.5486	stable
Acad8	1.29315	3.30681	22.333	3.34823e-18	1.75776e-16	31.4507	stable
Ldha	-1.06217	8.85842	-22.3303	3.35807e-18	1.75994e-16	31.4477	stable
Cad	-1.21591	3.87204	-22.3158	3.41124e-18	1.78477e-16	31.4316	stable
Kif20b	-1.39086	2.97134	-22.3121	3.42503e-18	1.78896e-16	31.4274	stable
Irak2	1.16095	5.34513	22.2825	3.53675e-18	1.84419e-16	31.3945	stable
2310005P05Rik	1.23923	4.41031	22.2559	3.6402e-18	1.89493e-16	31.3649	stable
Fkbp5	-1.42986	2.5538	-22.2439	3.68811e-18	1.91664e-16	31.3515	stable
LOC270491	1.12551	3.81531	22.2285	3.75063e-18	1.94585e-16	31.3343	stable
Abca9	1.28059	3.22714	22.2212	3.7804e-18	1.95801e-16	31.3262	stable
Papd4	1.06669	4.83247	22.2039	3.85211e-18	1.99181e-16	31.3069	stable
Usp8	1.28925	3.73497	22.1969	3.88154e-18	2.00367e-16	31.2991	stable
Gapdh	-1.10442	8.955	-22.1533	4.07042e-18	2.09766e-16	31.2504	stable
Mcm7	-1.7793	3.75909	-22.1175	4.23273e-18	2.17767e-16	31.2103	stable
Metrn	-1.28864	4.76368	-22.1111	4.26261e-18	2.18746e-16	31.2031	stable
Kcnn4	-1.12625	5.17097	-22.1104	4.26593e-18	2.18746e-16	31.2023	stable
Pdia5	-1.08112	3.5005	-22.1022	4.30402e-18	2.20333e-16	31.1932	stable
2700033B16Rik	1.15026	3.55036	22.0739	4.43955e-18	2.26895e-16	31.1614	stable
Tlr1	1.29698	4.11845	22.0577	4.51907e-18	2.30577e-16	31.1432	stable
8030451K01Rik	1.03008	5.19029	22.0331	4.64219e-18	2.36468e-16	31.1156	stable
Tmem189	1.34464	4.73492	22.0276	4.67061e-18	2.37524e-16	31.1094	stable
LOC212963	0.99029	4.21113	22.0046	4.78955e-18	2.43172e-16	31.0836	stable
Plk4	-1.11161	2.30766	-21.9888	4.87333e-18	2.47019e-16	31.0658	stable
EG329521	-1.0643	2.70276	-21.9716	4.96635e-18	2.51322e-16	31.0464	stable
Ctsh	1.06882	7.43377	21.9653	5.00077e-18	2.52649e-16	31.0393	stable
Spint1	-1.17244	4.14066	-21.9617	5.02064e-18	2.53239e-16	31.0352	stable
Ndufa11	-1.10343	7.09049	-21.9387	5.14934e-18	2.59253e-16	31.0093	stable
Tmem87b	1.07956	4.70611	21.9374	5.15667e-18	2.59253e-16	31.0078	stable
Bdp1	1.12658	2.8147	21.921	5.251e-18	2.63566e-16	30.9892	stable
2310045A20Rik	1.31334	4.37123	21.8527	5.66156e-18	2.83712e-16	30.912	stable
Fcrls	-1.17918	4.70406	-21.8493	5.68282e-18	2.84316e-16	30.9082	stable
Tsc22d3	1.13492	4.28337	21.8387	5.74989e-18	2.87206e-16	30.8961	stable
Cox7a2l	1.05863	7.71753	21.8309	5.79956e-18	2.89219e-16	30.8873	stable
Nme4	-1.07217	5.14797	-21.8022	5.98639e-18	2.97832e-16	30.8548	stable
Pdlim7	-1.44933	3.30988	-21.8004	5.99855e-18	2.97832e-16	30.8527	stable
Armc8	1.12011	3.18458	21.8	6.00121e-18	2.97832e-16	30.8523	stable
Sh3kbp1	1.54921	4.81297	21.7872	6.08698e-18	3.01604e-16	30.8377	stable
AW549877	1.18858	6.29318	21.7833	6.1135e-18	3.02418e-16	30.8333	stable
Rfc2	1.17438	5.62743	21.7819	6.12301e-18	3.02418e-16	30.8317	stable
Lrrc8	1.15793	2.92287	21.7743	6.17456e-18	3.04417e-16	30.8231	stable
Tfdp1	-1.17436	5.69888	-21.773	6.18321e-18	3.04417e-16	30.8216	stable
Pira2	1.09878	4.32875	21.7548	6.30924e-18	3.10127e-16	30.8009	stable
Lbh	-1.04238	3.73376	-21.742	6.39954e-18	3.14066e-16	30.7864	stable
Ffar2	-1.11225	2.4192	-21.7325	6.46723e-18	3.16884e-16	30.7756	stable
Cyp51	-1.34921	6.0959	-21.7237	6.53068e-18	3.19486e-16	30.7655	stable
Tmem120a	-1.12534	7.68936	-21.7197	6.55963e-18	3.20394e-16	30.761	stable
Il8ra	1.25891	3.15226	21.6952	6.74063e-18	3.28715e-16	30.7331	stable
Gna12	1.76647	4.4262	21.6847	6.81997e-18	3.32059e-16	30.7211	stable
Tlr6	1.20949	3.29049	21.6158	7.36376e-18	3.57971e-16	30.6424	stable
0610010I05Rik	1.54825	7.62842	21.5999	7.49573e-18	3.63814e-16	30.6242	stable
1700112C13Rik	1.20714	3.4667	21.5655	7.78946e-18	3.77459e-16	30.5847	stable
2900060B14Rik	-1.30554	2.99825	-21.5641	7.80132e-18	3.77459e-16	30.5832	stable
Scly	1.13481	3.74488	21.549	7.93463e-18	3.83308e-16	30.5658	stable
Tmem106a	1.02131	7.03876	21.5475	7.94774e-18	3.83342e-16	30.5641	stable
Sp140	1.33159	2.92683	21.5388	8.0252e-18	3.86474e-16	30.5541	stable
Lyst	0.997194	3.14355	21.5283	8.12001e-18	3.90431e-16	30.5421	stable
Zfp579	1.16421	4.02272	21.5153	8.23947e-18	3.95558e-16	30.5271	stable
Yif1b	-1.33229	7.18367	-21.5076	8.31094e-18	3.9837e-16	30.5182	stable
Midn	-1.11772	6.68106	-21.4981	8.39974e-18	4.02003e-16	30.5073	stable
Stfa1	-1.08199	2.13529	-21.4955	8.42416e-18	4.02547e-16	30.5044	stable
Dner	-1.08507	2.79718	-21.4802	8.57022e-18	4.08893e-16	30.4867	stable
E030007N04Rik	1.09141	4.64045	21.4398	8.96787e-18	4.26624e-16	30.4402	stable
2610029J22Rik	-1.04384	4.39913	-21.4396	8.96948e-18	4.26624e-16	30.44	stable
LOC100045284	1.2195	3.08938	21.4292	9.07493e-18	4.30975e-16	30.428	stable
EG433182	-1.72776	3.94211	-21.3794	9.5977e-18	4.55102e-16	30.3706	stable
EG633692	1.22419	7.3069	21.3657	9.74715e-18	4.60904e-16	30.3547	stable
Usp1	-1.18435	3.20503	-21.3647	9.75853e-18	4.60904e-16	30.3535	stable
Gm22	1.17049	3.27998	21.3641	9.76484e-18	4.60904e-16	30.3528	stable
Twf2	-1.12611	6.54692	-21.3619	9.78914e-18	4.61345e-16	30.3503	stable
Anxa1	1.30892	5.77045	21.358	9.83295e-18	4.62703e-16	30.3457	stable
Wwp1	1.11758	6.50948	21.347	9.95557e-18	4.6776e-16	30.333	stable
Sult1a1	1.26584	2.54187	21.3197	1.02664e-17	4.81075e-16	30.3015	stable
Lims2	1.01341	2.22408	21.3194	1.02701e-17	4.81075e-16	30.3011	stable
Mgst3	-1.47285	6.19409	-21.2906	1.06098e-17	4.96234e-16	30.2677	stable
Hn1l	-1.16385	5.19095	-21.2862	1.06634e-17	4.97984e-16	30.2625	stable
1700026L06Rik	0.974836	3.15481	21.2757	1.07903e-17	5.0315e-16	30.2504	stable
LOC100046211	-1.06207	5.08594	-21.2705	1.08538e-17	5.05347e-16	30.2444	stable
LOC383897	-1.03869	3.6095	-21.267	1.08963e-17	5.06565e-16	30.2403	stable
X99384	-1.27051	2.46997	-21.232	1.13379e-17	5.26302e-16	30.1996	stable
2310047D13Rik	-1.11691	3.15727	-21.2055	1.1684e-17	5.41552e-16	30.1687	stable
Naip5	1.2556	4.0361	21.1952	1.18211e-17	5.47084e-16	30.1568	stable
LOC100044430	1.30641	3.97702	21.1626	1.22664e-17	5.66845e-16	30.1188	stable
EG240327	1.21898	2.31109	21.1247	1.28071e-17	5.90947e-16	30.0745	stable
Spc24	-1.18573	2.63126	-21.0597	1.37924e-17	6.35458e-16	29.9985	stable
9130604K18Rik	-1.03877	3.53978	-21.052	1.39138e-17	6.40099e-16	29.9895	stable
Efr3a	1.19581	4.23199	21.0251	1.43493e-17	6.59149e-16	29.9578	stable
E330011I20Rik	1.03728	4.18927	21.014	1.45322e-17	6.66562e-16	29.9448	stable
Adss	1.40675	4.61066	21.0045	1.4691e-17	6.72513e-16	29.9337	stable
Lrp12	1.11853	7.46596	21.0036	1.47056e-17	6.72513e-16	29.9327	stable
Fblim1	1.07621	7.31166	20.9849	1.50242e-17	6.86066e-16	29.9107	stable
Pde1b	1.16829	4.96961	20.9815	1.50834e-17	6.87756e-16	29.9066	stable
LOC100046320	1.15659	3.40974	20.9652	1.53672e-17	6.99661e-16	29.8875	stable
4930524J08Rik	-1.22639	3.37752	-20.9626	1.54136e-17	7.00739e-16	29.8844	stable
Arhgef3	1.05349	5.69597	20.95	1.56377e-17	7.09881e-16	29.8696	stable
Prrc1	-1.03041	6.75588	-20.9332	1.59422e-17	7.22645e-16	29.8498	stable
Tmem181	1.17006	4.5721	20.925	1.60924e-17	7.28382e-16	29.8402	stable
LOC100046578	1.09479	3.267	20.9218	1.61513e-17	7.29978e-16	29.8364	stable
Mcm6	-1.62603	5.12671	-20.9055	1.64577e-17	7.42738e-16	29.8171	stable
Solh	1.1305	4.9586	20.8777	1.69914e-17	7.65704e-16	29.7844	stable
1110014O20Rik	1.28264	7.24096	20.8685	1.71727e-17	7.72744e-16	29.7735	stable
LOC242703	-1.11698	3.42645	-20.8668	1.72067e-17	7.73147e-16	29.7715	stable
Gdpd3	-1.03137	3.88314	-20.8643	1.7255e-17	7.74195e-16	29.7686	stable
Il11ra1	1.1148	8.13284	20.8537	1.74675e-17	7.82589e-16	29.756	stable
Abi3	1.26734	4.67336	20.8429	1.7686e-17	7.91231e-16	29.7433	stable
Fbxo36	1.12326	3.14341	20.8351	1.78458e-17	7.97224e-16	29.734	stable
Eef2	1.78008	6.64724	20.8265	1.80232e-17	8.03985e-16	29.7239	stable
Prg2	-1.22557	4.36182	-20.8178	1.82066e-17	8.10993e-16	29.7135	stable
Pgp	-1.29901	8.07725	-20.7932	1.87295e-17	8.33083e-16	29.6844	stable
EG667190	-1.09904	7.20037	-20.7902	1.87941e-17	8.34755e-16	29.6809	stable
Cenpl	-1.06471	4.74253	-20.7732	1.9167e-17	8.49531e-16	29.6607	stable
Tmem204	1.13635	2.40232	20.7726	1.91818e-17	8.49531e-16	29.6599	stable
Fcgr4	1.11482	7.88012	20.7578	1.9513e-17	8.62962e-16	29.6423	stable
Gp9	-1.24229	3.66366	-20.7475	1.97469e-17	8.72054e-16	29.6301	stable
Pop5	-1.32279	6.08722	-20.7243	2.02823e-17	8.94422e-16	29.6026	stable
4930427A07Rik	-1.13371	2.5483	-20.6953	2.09766e-17	9.2372e-16	29.5681	stable
Ppbp	-1.24884	5.92402	-20.6809	2.13309e-17	9.37982e-16	29.5509	stable
Ogfrl1	-1.0047	6.18367	-20.6637	2.17592e-17	9.55457e-16	29.5305	stable
Dpy30	-0.973926	6.11371	-20.6503	2.21013e-17	9.69098e-16	29.5145	stable
Atp6a1	1.3224	6.07122	20.6287	2.26639e-17	9.92358e-16	29.4887	stable
Tmed4	1.12009	5.08148	20.6129	2.30843e-17	1.00933e-15	29.4698	stable
LOC641240	1.13462	7.33646	20.6083	2.32066e-17	1.01325e-15	29.4644	stable
Pnpla2	1.19607	7.42729	20.6004	2.34226e-17	1.02123e-15	29.4549	stable
LOC100040592	-1.06812	8.57892	-20.5957	2.35506e-17	1.02537e-15	29.4493	stable
Rab9	1.41542	3.75057	20.5874	2.37784e-17	1.03382e-15	29.4394	stable
Tom1	1.38455	4.5909	20.58	2.39844e-17	1.04068e-15	29.4305	stable
Ptpro	1.14186	5.58099	20.5794	2.40036e-17	1.04068e-15	29.4297	stable
LOC385632	1.24145	3.72222	20.5566	2.46496e-17	1.06719e-15	29.4024	stable
Cox7a1	-1.04952	4.27288	-20.5513	2.48026e-17	1.07231e-15	29.3961	stable
Hnrnpk	1.19505	5.95811	20.5264	2.55329e-17	1.10234e-15	29.3663	stable
Rdm1	0.977409	5.10482	20.4968	2.64313e-17	1.13954e-15	29.3308	stable
Zdhhc13	1.07126	3.02563	20.4842	2.68241e-17	1.15486e-15	29.3157	stable
LOC100045677	-1.35142	4.26295	-20.4766	2.70657e-17	1.16301e-15	29.3064	stable
Trim47	-1.11408	4.29233	-20.4758	2.70889e-17	1.16301e-15	29.3056	stable
Dlg3	1.36567	3.16258	20.4666	2.73833e-17	1.17402e-15	29.2945	stable
Plk3	-1.00024	4.30756	-20.4641	2.74647e-17	1.17588e-15	29.2914	stable
Cd59a	1.23973	5.26196	20.4569	2.7696e-17	1.18414e-15	29.2828	stable
Ifit2	1.20291	3.39122	20.455	2.77572e-17	1.18512e-15	29.2805	stable
Me2	-0.992608	4.33611	-20.4538	2.77989e-17	1.18525e-15	29.279	stable
Stard4	-1.06096	4.99347	-20.4349	2.84217e-17	1.21014e-15	29.2563	stable
Tk2	1.21785	5.84365	20.4217	2.88629e-17	1.22723e-15	29.2404	stable
LOC100048845	1.12649	6.12769	20.4143	2.91139e-17	1.2362e-15	29.2315	stable
Txndc5	-1.09849	6.46914	-20.3656	3.08285e-17	1.30721e-15	29.1728	stable
Slc31a2	1.62163	4.28349	20.3521	3.13255e-17	1.32646e-15	29.1564	stable
Trim34	1.07925	3.64768	20.322	3.2453e-17	1.37232e-15	29.1201	stable
Mrgpre	1.02319	2.94803	20.3128	3.28068e-17	1.38538e-15	29.1089	stable
Irf1	1.15344	5.74412	20.2862	3.38553e-17	1.4277e-15	29.0766	stable
Itpripl2	1.36391	5.21716	20.2812	3.40541e-17	1.43413e-15	29.0706	stable
BC048355	-1.32382	2.85848	-20.2642	3.47461e-17	1.46128e-15	29.0499	stable
EG240916	1.07835	2.33739	20.249	3.53751e-17	1.48571e-15	29.0315	stable
Npm3	-1.02928	7.58797	-20.2194	3.66345e-17	1.53651e-15	28.9956	stable
Ak1	-1.04996	2.80223	-20.1971	3.76149e-17	1.57549e-15	28.9685	stable
Vps41	1.10357	2.97678	20.1485	3.98512e-17	1.66689e-15	28.9092	stable
Nudt5	-1.09575	5.50069	-20.1422	4.01472e-17	1.677e-15	28.9016	stable
Psmd10	1.19145	5.27221	20.1364	4.04261e-17	1.68637e-15	28.8945	stable
Cd82	0.975872	6.55628	20.1196	4.124e-17	1.718e-15	28.874	stable
scl000408.1_6	-1.0284	4.20892	-20.118	4.13225e-17	1.71912e-15	28.8719	stable
scl0001487.1_50	1.0994	3.95064	20.1153	4.14518e-17	1.72218e-15	28.8687	stable
Ncf4	0.98225	7.56344	20.1061	4.19105e-17	1.73889e-15	28.8574	stable
Orc6l	-1.23981	5.21588	-20.0964	4.23953e-17	1.75665e-15	28.8456	stable
Socs6	1.097	5.2214	20.0896	4.2742e-17	1.76863e-15	28.8373	stable
scavenger receptor	0.914158	4.64924	20.0841	4.30199e-17	1.77775e-15	28.8306	stable
Orai1	-1.02372	6.21223	-20.0821	4.31238e-17	1.77966e-15	28.8281	stable
Sepp1	1.31274	5.40347	20.0809	4.3185e-17	1.77981e-15	28.8267	stable
Tpcn2	1.04956	6.44706	20.0695	4.37782e-17	1.80185e-15	28.8127	stable
Csf3r	0.995357	2.4647	20.0588	4.43361e-17	1.82239e-15	28.7996	stable
Tpra40	1.06911	6.19752	20.0471	4.49629e-17	1.84569e-15	28.7852	stable
Cdadc1	0.947026	2.80923	20.0384	4.54279e-17	1.8623e-15	28.7747	stable
6430511F03	-0.991211	2.35624	-20.0306	4.58554e-17	1.87734e-15	28.765	stable
Rab12	1.24482	4.35221	20.0281	4.5993e-17	1.88047e-15	28.762	stable
F2rl2	-1.08153	3.1023	-19.9974	4.77124e-17	1.94819e-15	28.7243	stable
Ckap2	-1.02186	2.40016	-19.9628	4.97298e-17	2.02789e-15	28.6817	stable
Tob1	-1.31963	3.46633	-19.9602	4.98807e-17	2.03135e-15	28.6786	stable
Ctss	1.41788	6.42242	19.9181	5.24643e-17	2.13376e-15	28.6268	stable
2210411K11Rik	-1.26432	4.52132	-19.914	5.272e-17	2.14133e-15	28.6218	stable
Tuba3b	-1.10481	3.00061	-19.8936	5.40298e-17	2.19165e-15	28.5966	stable
Ppif	-0.922948	5.80513	-19.8896	5.42924e-17	2.19941e-15	28.5916	stable
Ptplad2	1.03824	4.43581	19.8719	5.54543e-17	2.24354e-15	28.5698	stable
6430524C05Rik	-0.9622	2.48001	-19.8629	5.6061e-17	2.26511e-15	28.5586	stable
Auh	-1.21738	3.77273	-19.8355	5.79369e-17	2.33785e-15	28.5248	stable
Alad	-0.958046	5.82955	-19.8238	5.87655e-17	2.36819e-15	28.5103	stable
Aoah	1.03918	5.01682	19.8074	5.99333e-17	2.4121e-15	28.49	stable
2410015N17Rik	-1.14475	5.2893	-19.8054	6.00807e-17	2.41488e-15	28.4875	stable
Tuba1a	-2.12158	4.52375	-19.7831	6.17192e-17	2.47752e-15	28.4599	down
LOC100047651	-1.31619	4.91684	-19.7621	6.33015e-17	2.53773e-15	28.4339	stable
B3galnt1	1.18205	5.06489	19.736	6.5336e-17	2.6159e-15	28.4014	stable
Dusp7	-0.885972	7.18511	-19.732	6.56517e-17	2.62513e-15	28.3964	stable
Tspan17	1.13133	3.62474	19.7225	6.64119e-17	2.65209e-15	28.3846	stable
Zkscan14	0.917669	4.56183	19.7053	6.781e-17	2.70443e-15	28.3632	stable
Serpinb1a	-1.20697	2.31732	-19.6998	6.82605e-17	2.71888e-15	28.3564	stable
Lyzl4	-1.04494	3.6872	-19.686	6.94089e-17	2.76106e-15	28.3393	stable
Pros1	0.992483	5.29344	19.6816	6.97853e-17	2.77246e-15	28.3337	stable
D930048N14Rik	1.38678	3.94592	19.6588	7.17383e-17	2.84462e-15	28.3053	stable
Phxr4	0.911026	2.72434	19.6583	7.1786e-17	2.84462e-15	28.3047	stable
Gja1	-1.05495	4.25624	-19.6451	7.29387e-17	2.88659e-15	28.2883	stable
Impdh1	-0.923732	4.22449	-19.6414	7.32665e-17	2.89576e-15	28.2837	stable
Prcp	0.994379	7.58261	19.6404	7.3358e-17	2.89576e-15	28.2824	stable
Abcg1	1.20915	4.77095	19.6347	7.38735e-17	2.91239e-15	28.2752	stable
Spnb2	1.04449	3.91402	19.625	7.47502e-17	2.94319e-15	28.2631	stable
Tnfsf12-tnfsf13	1.0008	7.60934	19.6151	7.5653e-17	2.97495e-15	28.2508	stable
Cd79b	-1.0225	2.79864	-19.5981	7.72355e-17	3.03059e-15	28.2295	stable
EG432879	-1.2033	2.52899	-19.5978	7.72645e-17	3.03059e-15	28.2291	stable
Akr1c12	1.11043	5.61075	19.5221	8.47322e-17	3.31929e-15	28.1343	stable
Rrp12	-1.06127	5.56918	-19.5181	8.5148e-17	3.33135e-15	28.1293	stable
Dncic2	-0.930668	3.78456	-19.5151	8.54595e-17	3.3393e-15	28.1255	stable
Grwd1	-0.936081	4.56469	-19.504	8.66223e-17	3.38046e-15	28.1117	stable
4930455G09Rik	0.958122	5.48071	19.4972	8.73428e-17	3.40427e-15	28.1031	stable
Ifngr1	0.897551	5.96848	19.4936	8.77278e-17	3.41497e-15	28.0986	stable
7420700D11Rik	0.914998	4.03857	19.4826	8.89193e-17	3.45535e-15	28.0848	stable
Sec23a	0.910365	2.90058	19.482	8.8989e-17	3.45535e-15	28.084	stable
6720463M24Rik	-0.971834	2.87674	-19.4797	8.92418e-17	3.46081e-15	28.081	stable
Pdxp	-1.06743	2.50117	-19.4705	9.02425e-17	3.49523e-15	28.0696	stable
LOC100043821	1.06057	2.57815	19.4529	9.2208e-17	3.56688e-15	28.0475	stable
Relb	0.956587	4.09012	19.4515	9.23666e-17	3.56854e-15	28.0457	stable
H2-Ab1	1.10624	7.82711	19.4366	9.40741e-17	3.62996e-15	28.0269	stable
C730026E21Rik	-0.922874	3.22416	-19.3863	1.00065e-16	3.8563e-15	27.9634	stable
Rps27a	-1.03973	7.07171	-19.3835	1.00406e-16	3.86464e-15	27.9599	stable
Galk1	-1.20069	5.57827	-19.3587	1.03522e-16	3.9796e-15	27.9285	stable
Acp5	1.37626	2.85591	19.3497	1.04677e-16	4.01901e-15	27.9171	stable
Mtif3	-1.11148	4.04468	-19.3321	1.06968e-16	4.10187e-15	27.8949	stable
2810440J20Rik	-1.03023	2.64956	-19.3228	1.08192e-16	4.1424e-15	27.8832	stable
Glrx1	-1.12258	7.0578	-19.3221	1.08294e-16	4.1424e-15	27.8822	stable
Ly6d	-0.863223	2.4956	-19.3206	1.08495e-16	4.14498e-15	27.8803	stable
Hnrnpf	1.12503	5.27231	19.3096	1.09978e-16	4.19643e-15	27.8664	stable
Gbx2	-1.1055	2.42799	-19.3038	1.10759e-16	4.22101e-15	27.8591	stable
D14Ertd449e	-1.1282	4.86631	-19.3011	1.11127e-16	4.2298e-15	27.8557	stable
2900010M23Rik	-0.995385	7.61479	-19.283	1.13641e-16	4.32017e-15	27.8327	stable
EG433144	0.979354	3.92739	19.2766	1.14538e-16	4.34894e-15	27.8246	stable
Leprel2	1.16526	3.10709	19.2752	1.14738e-16	4.35116e-15	27.8228	stable
2310044G17Rik	0.994313	7.33551	19.271	1.15334e-16	4.3684e-15	27.8175	stable
5430434G16Rik	1.00467	3.75173	19.2668	1.15931e-16	4.38562e-15	27.8122	stable
Acsl5	0.895411	2.82111	19.2558	1.17523e-16	4.43582e-15	27.7982	stable
Msh6	-1.01912	4.99108	-19.2557	1.17545e-16	4.43582e-15	27.798	stable
LOC100045796	-1.06732	3.15386	-19.2519	1.18094e-16	4.45107e-15	27.7932	stable
Ube2q2	1.1185	2.8792	19.2484	1.18598e-16	4.46465e-15	27.7888	stable
Raf1	1.23919	3.52048	19.2451	1.19088e-16	4.47763e-15	27.7846	stable
BC004044	0.999642	5.73242	19.2245	1.22164e-16	4.58768e-15	27.7584	stable
Ddit4	-0.924691	3.10648	-19.2176	1.23211e-16	4.62137e-15	27.7496	stable
Tmem158	-1.23616	2.88166	-19.2123	1.24019e-16	4.64604e-15	27.7429	stable
Tmem49	1.2227	2.94598	19.2002	1.25894e-16	4.71056e-15	27.7275	stable
Timp2	1.01687	8.35898	19.1975	1.26313e-16	4.72053e-15	27.7241	stable
D630004K10Rik	1.04837	4.11891	19.1942	1.26838e-16	4.73441e-15	27.7198	stable
Iqgap3	-1.02379	2.03638	-19.163	1.31836e-16	4.91347e-15	27.6801	stable
Gsg2	-1.03906	3.35345	-19.1623	1.31953e-16	4.91347e-15	27.6792	stable
Csf1r	1.16143	5.7601	19.1501	1.33976e-16	4.98278e-15	27.6636	stable
Rbbp7	1.01668	4.75921	19.1412	1.35461e-16	5.03196e-15	27.6522	stable
Max	1.08883	4.18139	19.13	1.37359e-16	5.09632e-15	27.6379	stable
Manbal	0.976645	6.83971	19.1058	1.41557e-16	5.24577e-15	27.607	stable
LOC100047214	1.04054	5.19951	19.1005	1.42495e-16	5.2742e-15	27.6002	stable
Ticam2	1.00638	4.5874	19.0912	1.44148e-16	5.329e-15	27.5883	stable
Aars	-0.964937	7.35657	-19.0637	1.49172e-16	5.50812e-15	27.5531	stable
1500003O03Rik	1.22836	3.37042	19.0579	1.50269e-16	5.54201e-15	27.5456	stable
5133400G04Rik	-0.998148	3.40768	-19.0182	1.57905e-16	5.81666e-15	27.4947	stable
AA467197	-0.967497	4.02512	-19.0055	1.60432e-16	5.90269e-15	27.4784	stable
Inpp5k	1.07847	7.02559	19.0023	1.61062e-16	5.91884e-15	27.4743	stable
Hp	-1.11536	3.42836	-18.9687	1.67975e-16	6.16553e-15	27.4311	stable
S100a10	-1.2687	6.03758	-18.9491	1.72155e-16	6.31148e-15	27.4059	stable
BC003324	1.41628	6.94224	18.9449	1.73059e-16	6.3314e-15	27.4005	stable
Rab11fip3	-1.00448	2.69911	-18.9447	1.73109e-16	6.3314e-15	27.4002	stable
1810011H11Rik	-1.27091	5.65526	-18.9429	1.73492e-16	6.33789e-15	27.3979	stable
5530401J07Rik	1.10871	4.41379	18.9386	1.74432e-16	6.36471e-15	27.3924	stable
Ccdc99	-1.01621	5.85863	-18.9369	1.74804e-16	6.37076e-15	27.3902	stable
Cdc25c	-1.03686	2.5944	-18.9359	1.75022e-16	6.37116e-15	27.3889	stable
Cd81	-1.08568	7.58697	-18.9275	1.76879e-16	6.43117e-15	27.3781	stable
Trim36	0.924289	3.00969	18.915	1.79681e-16	6.52229e-15	27.3619	stable
LOC209281	1.06575	4.30431	18.9144	1.79807e-16	6.52229e-15	27.3612	stable
EG433229	0.981459	4.51525	18.9033	1.82333e-16	6.60616e-15	27.3468	stable
Maml2	1.28853	3.87782	18.8898	1.85453e-16	6.7113e-15	27.3294	stable
Chst3	-1.0561	2.64152	-18.8864	1.86261e-16	6.73265e-15	27.3249	stable
Lpin1	1.25494	3.92389	18.854	1.94017e-16	7.0048e-15	27.283	stable
Rgs14	-0.926692	2.25366	-18.8381	1.97939e-16	7.13806e-15	27.2624	stable
Rpa3	-1.33312	4.51075	-18.8345	1.9883e-16	7.16183e-15	27.2578	stable
Itgb2	0.959523	4.92157	18.8189	2.02773e-16	7.29536e-15	27.2376	stable
Apaf1	1.05995	4.02533	18.8148	2.03828e-16	7.32418e-15	27.2323	stable
Tceal7	1.19957	2.29383	18.8139	2.04049e-16	7.32418e-15	27.2312	stable
1810033B17Rik	-0.956933	3.32908	-18.8028	2.06943e-16	7.41943e-15	27.2167	stable
LOC634015	-1.03552	8.01538	-18.7963	2.08647e-16	7.47185e-15	27.2083	stable
Ttc33	1.20609	4.02738	18.7942	2.09187e-16	7.48251e-15	27.2056	stable
Gnas	1.2491	4.96168	18.7918	2.09821e-16	7.49333e-15	27.2025	stable
Fkbp11	-1.07479	3.39576	-18.7913	2.09975e-16	7.49333e-15	27.2018	stable
Gdf15	-1.06386	7.81264	-18.7881	2.10812e-16	7.5145e-15	27.1977	stable
Xdh	0.975813	7.10092	18.7776	2.1364e-16	7.60652e-15	27.184	stable
Cd74	1.01921	8.43443	18.7665	2.16643e-16	7.70456e-15	27.1696	stable
1810055G02Rik	-1.09868	4.38266	-18.7297	2.26965e-16	8.06235e-15	27.1218	stable
scl0001187.1_2	0.870625	2.55485	18.7236	2.28739e-16	8.11603e-15	27.1138	stable
1810015C11Rik	0.965091	3.43448	18.7118	2.32195e-16	8.2292e-15	27.0984	stable
Rapgef3	1.39667	2.85587	18.707	2.33589e-16	8.2691e-15	27.0922	stable
2310005N03Rik	-0.921687	4.943	-18.7037	2.34583e-16	8.29479e-15	27.0878	stable
Arpc4	-0.919579	7.90019	-18.6982	2.3622e-16	8.3431e-15	27.0807	stable
H2-Eb1	1.17193	6.58586	18.6608	2.47687e-16	8.73812e-15	27.032	stable
Tgoln1	1.07304	4.56002	18.6327	2.56702e-16	9.04582e-15	26.9952	stable
6720460F02Rik	-0.879722	2.51782	-18.6309	2.57288e-16	9.05613e-15	26.9929	stable
Acot7	-1.1249	4.90553	-18.6206	2.60696e-16	9.16562e-15	26.9794	stable
Ppih	-1.023	5.69482	-18.608	2.64909e-16	9.30315e-15	26.9629	stable
Srebf2	-1.02951	5.8767	-18.5983	2.68194e-16	9.40782e-15	26.9502	stable
Ctdspl	-1.0287	3.1588	-18.5866	2.72226e-16	9.53843e-15	26.9349	stable
D630014A15Rik	1.3113	4.81812	18.5829	2.73537e-16	9.57348e-15	26.9299	stable
Ppm1a	0.93338	4.87724	18.5796	2.7466e-16	9.60189e-15	26.9257	stable
Pak2	1.00529	4.75591	18.5732	2.76922e-16	9.67005e-15	26.9173	stable
H2-Q8	0.918567	2.154	18.5504	2.85107e-16	9.94461e-15	26.8873	stable
Klk1b11	-0.933794	3.66415	-18.5481	2.85955e-16	9.96291e-15	26.8843	stable
Map2k3	-0.875201	7.645	-18.5409	2.8857e-16	1.00427e-14	26.8749	stable
Ctsz	0.811475	8.62695	18.5374	2.8986e-16	1.00762e-14	26.8704	stable
2210410E06Rik	-0.891835	5.51264	-18.5326	2.91646e-16	1.01269e-14	26.864	stable
Gpr109a	-1.08063	2.90737	-18.5303	2.92534e-16	1.01463e-14	26.8609	stable
Bfar	1.06085	3.81039	18.5281	2.93354e-16	1.01633e-14	26.858	stable
Galnt1	0.920197	3.96376	18.5266	2.93915e-16	1.01714e-14	26.8561	stable
Tspan32	-0.995345	4.13029	-18.5208	2.96093e-16	1.02353e-14	26.8485	stable
Bzrap1	-0.908018	2.51879	-18.5137	2.98781e-16	1.03166e-14	26.8392	stable
D1Bwg0212e	-0.855208	3.16204	-18.5107	2.99927e-16	1.03446e-14	26.8353	stable
Ddx58	1.20544	3.59263	18.5053	3.02024e-16	1.04054e-14	26.8281	stable
scl0001905.1_3	1.18885	4.37157	18.4949	3.06086e-16	1.0524e-14	26.8144	stable
Pnkp	-0.891922	4.5185	-18.4947	3.06152e-16	1.0524e-14	26.8141	stable
Bax	-0.834798	7.08701	-18.4931	3.06792e-16	1.05343e-14	26.812	stable
EG622320	0.894442	4.30345	18.4914	3.07428e-16	1.05445e-14	26.8099	stable
Slc7a7	0.953969	4.89044	18.4856	3.09751e-16	1.06123e-14	26.8021	stable
Nola2	-0.912642	7.24024	-18.4837	3.10497e-16	1.06261e-14	26.7996	stable
Laptm4a	1.0843	7.89326	18.4761	3.13523e-16	1.07178e-14	26.7897	stable
Epas1	0.943962	2.68963	18.4659	3.17634e-16	1.08463e-14	26.7763	stable
Hrmt1l2	-0.929933	6.67641	-18.4562	3.21617e-16	1.09701e-14	26.7635	stable
C730026J16	1.42011	5.62712	18.4403	3.28242e-16	1.11838e-14	26.7425	stable
Hist1h3a	-1.22308	2.99268	-18.4368	3.29751e-16	1.12228e-14	26.7378	stable
Fcnb	-1.09536	2.44495	-18.4306	3.32361e-16	1.12992e-14	26.7297	stable
Cenpk	-1.14788	2.41513	-18.4236	3.35368e-16	1.13889e-14	26.7204	stable
Nsl1	-0.8518	2.37708	-18.4013	3.45116e-16	1.1707e-14	26.691	stable
Ddx11	-1.03999	3.15933	-18.3946	3.48134e-16	1.17964e-14	26.682	stable
2810428I15Rik	-1.25868	6.39737	-18.3794	3.54967e-16	1.20148e-14	26.662	stable
Palm	-0.931044	2.50377	-18.3765	3.56299e-16	1.20467e-14	26.6582	stable
2310005E10Rik	0.951447	4.36948	18.3497	3.68816e-16	1.24562e-14	26.6227	stable
Snrpf	-0.902009	6.2893	-18.3398	3.73551e-16	1.26024e-14	26.6096	stable
Tnfaip2	0.918166	7.23718	18.3171	3.84668e-16	1.29632e-14	26.5794	stable
D330008I21Rik	1.07605	2.96106	18.3048	3.90815e-16	1.31414e-14	26.5631	stable
BC055324	-0.965809	2.55451	-18.3042	3.9114e-16	1.31414e-14	26.5623	stable
LOC237877	-1.05505	3.17215	-18.3035	3.91513e-16	1.31414e-14	26.5613	stable
2310039H08Rik	-1.08528	5.91216	-18.3032	3.91658e-16	1.31414e-14	26.5609	stable
Tpm4	1.06731	3.77953	18.2994	3.93584e-16	1.31917e-14	26.5559	stable
Glt25d1	0.915608	7.17811	18.2965	3.95044e-16	1.32263e-14	26.5521	stable
Plxdc1	0.873175	4.47348	18.2942	3.96235e-16	1.32518e-14	26.549	stable
A530050E01Rik	1.10333	3.01196	18.2885	3.99165e-16	1.33353e-14	26.5414	stable
Epb4.1l1	1.05442	5.31409	18.2804	4.03361e-16	1.34609e-14	26.5306	stable
Tmem97	-0.968386	6.53128	-18.2736	4.06912e-16	1.35648e-14	26.5216	stable
Hat1	-0.942075	7.47616	-18.2652	4.11347e-16	1.36978e-14	26.5105	stable
1700027M01Rik	0.888989	6.62904	18.2339	4.28393e-16	1.42501e-14	26.4687	stable
3000004C01Rik	-1.25917	2.6146	-18.2165	4.38136e-16	1.45585e-14	26.4456	stable
Cep55	-0.9657	2.1962	-18.2124	4.40474e-16	1.46204e-14	26.4401	stable
Cav2	1.2617	3.73632	18.2102	4.41761e-16	1.46474e-14	26.4371	stable
Snx30	-0.987575	4.80071	-18.2069	4.43637e-16	1.46784e-14	26.4328	stable
Klc4	0.911085	6.28076	18.2069	4.43647e-16	1.46784e-14	26.4328	stable
H2-Aa	1.08481	6.12418	18.2016	4.46696e-16	1.47635e-14	26.4257	stable
3830421F03Rik	-0.848949	2.95438	-18.1843	4.56866e-16	1.50719e-14	26.4026	stable
Hmgb2	-1.6012	4.64984	-18.1841	4.57005e-16	1.50719e-14	26.4023	stable
Parp2	0.822598	6.31582	18.1728	4.63744e-16	1.52778e-14	26.3872	stable
Cln8	1.03323	3.70366	18.1683	4.66459e-16	1.53509e-14	26.3812	stable
B3gnt9	-1.03531	2.73013	-18.1658	4.67981e-16	1.53846e-14	26.3779	stable
5730406M06Rik	1.07033	5.01839	18.1637	4.69286e-16	1.54111e-14	26.375	stable
Rab11fip5	1.06457	7.20503	18.1603	4.71366e-16	1.54629e-14	26.3704	stable
1190005I06Rik	0.882997	3.91642	18.1383	4.85059e-16	1.58952e-14	26.341	stable
Ica1	-0.950005	3.18364	-18.1254	4.93253e-16	1.61466e-14	26.3238	stable
Bbs10	1.00365	3.26389	18.1179	4.98077e-16	1.62725e-14	26.3138	stable
Cdk5r1	-1.02618	3.00894	-18.1178	4.98152e-16	1.62725e-14	26.3136	stable
C2	1.18477	2.64406	18.1109	5.02688e-16	1.64033e-14	26.3043	stable
Cdkn1a	-1.07295	7.59251	-18.0947	5.13418e-16	1.67357e-14	26.2826	stable
Pfkl	-0.862532	6.36852	-18.0874	5.18299e-16	1.6877e-14	26.2729	stable
Tubb6	-1.05253	6.24397	-18.0812	5.22529e-16	1.69968e-14	26.2645	stable
Gm2a	1.10971	7.9533	18.0796	5.2358e-16	1.70131e-14	26.2624	stable
Slc11a1	1.11556	8.39399	18.0773	5.25167e-16	1.70467e-14	26.2593	stable
Aspm	-0.991842	2.03106	-18.0627	5.35285e-16	1.73569e-14	26.2397	stable
E030030I06Rik	-0.878513	3.14468	-18.0588	5.38062e-16	1.74193e-14	26.2344	stable
LOC100042777	-0.866776	6.79548	-18.0584	5.38341e-16	1.74193e-14	26.2338	stable
2610009E16Rik	1.01701	6.84178	18.0511	5.43445e-16	1.75661e-14	26.2241	stable
Nsmce1	-0.927169	6.51128	-18.0308	5.58133e-16	1.8022e-14	26.1967	stable
C3	0.918248	5.20347	18.0291	5.59335e-16	1.80419e-14	26.1945	stable
Mecp2	0.875182	3.5845	18.0227	5.64042e-16	1.81747e-14	26.1859	stable
LOC100046650	-0.960158	8.67945	-17.9891	5.89466e-16	1.89742e-14	26.1406	stable
Olfr110	0.963024	2.60096	17.9731	6.01948e-16	1.93557e-14	26.119	stable
Bcas1	-0.915215	2.17514	-17.9716	6.03111e-16	1.9373e-14	26.117	stable
scl0003251.1_21	1.334	4.5209	17.9707	6.03803e-16	1.9375e-14	26.1158	stable
0610037D15Rik	0.928274	3.14916	17.9617	6.11022e-16	1.95863e-14	26.1036	stable
Cd28	1.11357	5.89654	17.9376	6.30701e-16	2.01962e-14	26.071	stable
Rps6ka5	-0.913533	3.0534	-17.9322	6.35164e-16	2.0318e-14	26.0638	stable
Saal1	-0.878819	4.95321	-17.9213	6.4432e-16	2.05896e-14	26.0491	stable
Slc2a1	-1.11554	6.24938	-17.9147	6.49959e-16	2.07483e-14	26.0401	stable
Fabp5	1.0427	6.48931	17.9071	6.5648e-16	2.09348e-14	26.0298	stable
Zdhhc17	1.02927	2.52309	17.8999	6.62759e-16	2.11132e-14	26.02	stable
Slc19a2	-1.07977	4.14261	-17.8859	6.75066e-16	2.14831e-14	26.0011	stable
Mmrn1	-0.919576	2.89725	-17.8724	6.87165e-16	2.18456e-14	25.9829	stable
Rad51ap1	-1.04734	2.47569	-17.858	7.00426e-16	2.22443e-14	25.9632	stable
Zfhx1b	0.92184	3.52522	17.8549	7.03247e-16	2.23109e-14	25.9591	stable
Ly96	1.17699	5.81769	17.8503	7.0749e-16	2.24225e-14	25.9529	stable
Tmem171	-0.798622	2.38598	-17.8453	7.1225e-16	2.25502e-14	25.946	stable
Pla2g7	2.00328	4.74534	17.8358	7.21261e-16	2.28121e-14	25.9331	up
Adssl1	-0.908724	6.64812	-17.8204	7.36024e-16	2.32552e-14	25.9122	stable
Tor3a	1.07292	3.42124	17.8114	7.44896e-16	2.35114e-14	25.8999	stable
Tmem51	0.846176	7.23483	17.7928	7.6343e-16	2.40718e-14	25.8746	stable
1200002N14Rik	0.924814	6.01096	17.7849	7.71435e-16	2.42994e-14	25.8639	stable
Satb1	-1.16945	3.39261	-17.7838	7.72545e-16	2.43096e-14	25.8624	stable
E2f4	-0.97562	4.37569	-17.7702	7.86616e-16	2.47179e-14	25.8439	stable
Ahcyl1	0.883384	6.36179	17.7694	7.87491e-16	2.47179e-14	25.8427	stable
LOC100048706	-0.816391	2.64473	-17.7689	7.87923e-16	2.47179e-14	25.8421	stable
Park7	-0.85965	8.28503	-17.7517	8.06113e-16	2.52377e-14	25.8187	stable
Pmvk	-1.07137	4.08019	-17.7517	8.06127e-16	2.52377e-14	25.8187	stable
Kif16b	0.860953	3.41564	17.75	8.07965e-16	2.52696e-14	25.8163	stable
LOC381200	0.971667	3.48301	17.73	8.29645e-16	2.59214e-14	25.7891	stable
Cyb5r3	1.53869	3.28873	17.7222	8.38351e-16	2.61669e-14	25.7783	stable
LOC381140	0.932956	6.21632	17.7182	8.42751e-16	2.62777e-14	25.773	stable
Rrp9	-1.0478	4.18114	-17.7164	8.44857e-16	2.63167e-14	25.7704	stable
Gusb	1.03271	6.77686	17.7133	8.4829e-16	2.6397e-14	25.7662	stable
Rmnd1	0.829124	5.39543	17.7067	8.55731e-16	2.66018e-14	25.7572	stable
6230400G14Rik	0.86406	2.40561	17.705	8.57695e-16	2.6636e-14	25.7549	stable
Vars	-1.10212	4.51743	-17.6794	8.87384e-16	2.75303e-14	25.7199	stable
Ruvbl2	-0.963531	4.74237	-17.6606	9.09886e-16	2.82001e-14	25.6941	stable
Pira1	1.15358	4.8871	17.6463	9.27429e-16	2.87149e-14	25.6745	stable
Pcca	0.901374	4.35829	17.6301	9.47689e-16	2.92984e-14	25.6523	stable
Csf2rb	0.955684	2.47899	17.6296	9.48266e-16	2.92984e-14	25.6516	stable
H2afz	-1.02699	8.5431	-17.629	9.49119e-16	2.92984e-14	25.6507	stable
1110001J03Rik	-1.20692	4.86644	-17.6229	9.56787e-16	2.94859e-14	25.6424	stable
scl0002368.1_75	0.962293	4.12831	17.6227	9.57104e-16	2.94859e-14	25.6421	stable
Klra10	1.06666	3.21643	17.6179	9.63212e-16	2.96445e-14	25.6356	stable
Fam162a	-0.870414	5.80985	-17.6092	9.74544e-16	2.99633e-14	25.6235	stable
Glrx5	-0.957027	6.84195	-17.5879	1.00267e-15	3.07975e-14	25.5943	stable
Tnnt1	-1.14882	3.05965	-17.5842	1.00755e-15	3.09164e-14	25.5893	stable
Vps13b	0.863419	5.60654	17.5622	1.03764e-15	3.18082e-14	25.559	stable
Layn	1.00565	2.71261	17.5511	1.05323e-15	3.22541e-14	25.5437	stable
E130112E08Rik	-1.14109	5.56203	-17.5262	1.08893e-15	3.33143e-14	25.5094	stable
Bdh1	-0.988224	3.03071	-17.5198	1.0983e-15	3.35676e-14	25.5006	stable
LOC215879	1.00473	3.3532	17.4898	1.14352e-15	3.49152e-14	25.4591	stable
Selpl	0.966262	5.25431	17.4708	1.17312e-15	3.57809e-14	25.4328	stable
Lpcat4	-0.885325	2.19653	-17.4701	1.17419e-15	3.57809e-14	25.4319	stable
A130092J06Rik	-0.870848	6.1047	-17.4671	1.179e-15	3.58919e-14	25.4276	stable
Exosc8	-0.967392	4.73503	-17.4629	1.18563e-15	3.60582e-14	25.4219	stable
Mical1	0.837275	3.97056	17.4543	1.19944e-15	3.64423e-14	25.41	stable
LOC100047353	1.14939	6.92288	17.4443	1.21566e-15	3.68977e-14	25.3962	stable
Akap11	0.953685	4.80634	17.4435	1.21704e-15	3.68977e-14	25.395	stable
Igk-C	-0.892257	3.36832	-17.4429	1.21801e-15	3.68977e-14	25.3942	stable
Zfp275	0.907268	3.98664	17.4309	1.23782e-15	3.7461e-14	25.3776	stable
Mefv	0.842797	2.4592	17.4205	1.25532e-15	3.79534e-14	25.3631	stable
Vps26a	1.07238	3.33326	17.4147	1.26514e-15	3.82129e-14	25.3551	stable
1700029F09Rik	-1.10272	4.87422	-17.4117	1.27017e-15	3.83274e-14	25.351	stable
Vrk1	-1.04017	4.77273	-17.3933	1.30223e-15	3.92234e-14	25.3254	stable
Tpi1	-1.09341	8.93611	-17.3932	1.30241e-15	3.92234e-14	25.3253	stable
1700081H05Rik	-0.859425	3.26944	-17.3911	1.306e-15	3.92932e-14	25.3224	stable
Irak4	0.805167	4.13239	17.3901	1.30774e-15	3.93073e-14	25.3211	stable
Lyl1	-0.86604	5.83252	-17.3658	1.3514e-15	4.05802e-14	25.2873	stable
C77080	0.948286	6.91251	17.3536	1.374e-15	4.12186e-14	25.2702	stable
Ednrb	-0.910289	5.69969	-17.3422	1.39532e-15	4.18176e-14	25.2544	stable
Mbd3	-0.884901	5.53373	-17.338	1.40314e-15	4.20111e-14	25.2486	stable
A630084D02Rik	-0.951955	4.2742	-17.3353	1.40831e-15	4.21142e-14	25.2448	stable
Iigp2	0.82759	4.86928	17.3348	1.40931e-15	4.21142e-14	25.2441	stable
Ckap2l	-0.995689	2.25608	-17.3328	1.41317e-15	4.21823e-14	25.2413	stable
Dbf4	-1.14223	4.7408	-17.3322	1.41432e-15	4.21823e-14	25.2405	stable
Crry	1.12956	3.61454	17.3309	1.41685e-15	4.22169e-14	25.2386	stable
Ube2l6	1.01987	4.71662	17.3153	1.44703e-15	4.30427e-14	25.2169	stable
Tmem38b	0.8229	7.37168	17.3151	1.44735e-15	4.30427e-14	25.2167	stable
Mod1	-0.860459	2.95	-17.3015	1.47426e-15	4.38008e-14	25.1978	stable
LOC100046898	-1.18517	6.24385	-17.2885	1.50059e-15	4.45401e-14	25.1796	stable
Dorz1	-0.963298	3.52816	-17.2818	1.51434e-15	4.49051e-14	25.1702	stable
Mrps11	-0.855843	5.58181	-17.2648	1.54971e-15	4.59099e-14	25.1464	stable
1110007L15Rik	-1.01774	6.11091	-17.2622	1.55511e-15	4.60256e-14	25.1428	stable
Cenpt	-0.945085	4.94614	-17.2534	1.57386e-15	4.65359e-14	25.1305	stable
Mknk1	0.835902	6.78755	17.2295	1.62574e-15	4.80238e-14	25.0972	stable
D17Wsu104e	-0.892528	6.36074	-17.2231	1.64001e-15	4.8399e-14	25.0882	stable
2610302F08Rik	1.19444	2.61521	17.2199	1.64726e-15	4.85665e-14	25.0836	stable
E2f1	-0.81974	5.87098	-17.1999	1.69259e-15	4.98554e-14	25.0557	stable
G0s2	-0.986947	2.71562	-17.1924	1.71009e-15	5.0323e-14	25.0451	stable
A530017D24Rik	1.08378	3.6158	17.1855	1.72617e-15	5.07478e-14	25.0355	stable
Ccnt2	0.841282	5.28467	17.1844	1.72886e-15	5.07784e-14	25.0339	stable
Ubl4	-0.875443	5.61229	-17.1793	1.74079e-15	5.10802e-14	25.0268	stable
C130050O18Rik	-0.994815	2.7675	-17.1692	1.76508e-15	5.17438e-14	25.0126	stable
Cog7	0.87591	4.02308	17.1622	1.78185e-15	5.21858e-14	25.0028	stable
Cd37	0.984374	5.82011	17.1486	1.81543e-15	5.31189e-14	24.9836	stable
LOC236371	0.881812	4.67637	17.1425	1.83056e-15	5.35108e-14	24.9751	stable
Clec2d	1.41318	5.51323	17.1367	1.84508e-15	5.38843e-14	24.967	stable
2810422J05Rik	0.808473	4.1602	17.1323	1.85628e-15	5.41601e-14	24.9607	stable
6330405H19	0.912963	5.4153	17.1301	1.86197e-15	5.42748e-14	24.9576	stable
Atp6v1g2	1.05299	3.05272	17.1153	1.9e-15	5.53311e-14	24.9368	stable
Slc25a30	0.951301	3.57393	17.1095	1.91518e-15	5.57206e-14	24.9286	stable
AA407659	-0.877046	5.57755	-17.1087	1.91705e-15	5.57226e-14	24.9276	stable
C230043G09Rik	0.878402	5.73122	17.1047	1.92756e-15	5.59753e-14	24.922	stable
Wdhd1	-0.960369	3.01174	-17.1033	1.93148e-15	5.60364e-14	24.9199	stable
Hnrpa1	-0.99287	5.30705	-17.0862	1.97703e-15	5.73042e-14	24.8959	stable
3202002H23Rik	-0.861814	2.37411	-17.0701	2.02137e-15	5.85345e-14	24.8731	stable
Ard1a	-0.841221	5.93182	-17.0619	2.04425e-15	5.91416e-14	24.8615	stable
Pkm2	-1.06855	5.95631	-17.0571	2.05776e-15	5.94767e-14	24.8547	stable
2310007G05Rik	-0.942066	4.09972	-17.0563	2.05988e-15	5.94822e-14	24.8537	stable
1190002H23Rik	-0.944713	3.7617	-17.039	2.10938e-15	6.08545e-14	24.8293	stable
Crebl2	0.838283	2.90823	17.0302	2.13507e-15	6.15383e-14	24.8168	stable
Il12a	-0.884406	2.29805	-17.0079	2.2016e-15	6.33965e-14	24.7852	stable
Igsf6	0.93101	2.72928	17.0017	2.22025e-15	6.38742e-14	24.7766	stable
Ctsf	1.26198	3.2001	17.0002	2.22498e-15	6.39506e-14	24.7744	stable
Dnajc28	0.977602	3.25125	16.997	2.2347e-15	6.41702e-14	24.7699	stable
Mgst1	1.10764	6.81269	16.9871	2.26555e-15	6.49957e-14	24.7558	stable
Klhl24	0.944491	3.04628	16.9854	2.27074e-15	6.5084e-14	24.7534	stable
Arl6ip5	0.99522	7.20945	16.9704	2.31817e-15	6.63819e-14	24.7322	stable
6330416G13Rik	0.922084	5.17791	16.9653	2.33463e-15	6.67912e-14	24.7249	stable
H2-M3	0.902228	6.11731	16.9645	2.33706e-15	6.67977e-14	24.7238	stable
Slc16a3	-0.856898	2.38048	-16.9632	2.34117e-15	6.67977e-14	24.722	stable
Dok1	1.18414	4.5151	16.9632	2.34135e-15	6.67977e-14	24.7219	stable
Slc17a5	0.944007	5.03175	16.9569	2.36165e-15	6.73148e-14	24.713	stable
LOC100038908	0.837577	3.67853	16.9381	2.42393e-15	6.9026e-14	24.6863	stable
Hnrpab	-0.850067	3.3418	-16.9149	2.50282e-15	7.1207e-14	24.6533	stable
Ptpn12	1.18772	2.62242	16.9109	2.51672e-15	7.15364e-14	24.6476	stable
Pi16	-1.09728	2.09613	-16.902	2.54771e-15	7.23507e-14	24.635	stable
Oxsr1	-0.874812	3.50622	-16.8911	2.58646e-15	7.33838e-14	24.6195	stable
Nfkbil2	-0.930904	2.76027	-16.8694	2.66515e-15	7.54929e-14	24.5887	stable
E230027K01Rik	0.862418	4.17479	16.8693	2.66569e-15	7.54929e-14	24.5885	stable
5730550L01Rik	0.886268	3.55584	16.8682	2.66989e-15	7.55424e-14	24.5868	stable
Ndufa12	-0.881885	7.20634	-16.8621	2.69232e-15	7.61074e-14	24.5782	stable
Fbxl15	-0.936326	4.52502	-16.8582	2.70704e-15	7.64533e-14	24.5726	stable
2610524H06Rik	-0.876751	3.99082	-16.834	2.79947e-15	7.89917e-14	24.5381	stable
Gm114	0.789268	4.69571	16.8268	2.82754e-15	7.97107e-14	24.5278	stable
scl0004023.1_57	0.868351	2.97951	16.8205	2.8524e-15	8.03384e-14	24.5188	stable
LOC100047155	-0.833875	5.37516	-16.8166	2.86803e-15	8.06588e-14	24.5132	stable
LOC100046120	-0.82718	3.0968	-16.8163	2.86901e-15	8.06588e-14	24.5128	stable
1110004P21Rik	0.804814	2.42222	16.8101	2.89368e-15	8.12785e-14	24.504	stable
Pdgfa	1.14262	7.14896	16.8076	2.90402e-15	8.14948e-14	24.5004	stable
Def6	-0.793956	5.26687	-16.8032	2.92155e-15	8.19121e-14	24.4942	stable
Hvcn1	0.773001	7.59514	16.8005	2.93262e-15	8.21479e-14	24.4903	stable
Syn1	0.941247	4.59561	16.7946	2.95673e-15	8.27483e-14	24.4818	stable
Mat2b	0.949815	3.7208	16.7735	3.0449e-15	8.51386e-14	24.4516	stable
Gpr137b-ps	0.884787	8.14154	16.7609	3.0989e-15	8.65701e-14	24.4335	stable
Clpp	-0.78999	6.14818	-16.7589	3.1074e-15	8.67291e-14	24.4307	stable
LOC675899	-1.19579	6.66346	-16.7491	3.15027e-15	8.78461e-14	24.4166	stable
Armc6	-1.00552	3.40182	-16.745	3.16804e-15	8.82618e-14	24.4108	stable
Alg14	-0.814408	5.00627	-16.7428	3.17813e-15	8.84631e-14	24.4076	stable
1110070O15Rik	-1.00981	3.31307	-16.7387	3.19602e-15	8.88809e-14	24.4018	stable
Treml1	-0.855246	4.53453	-16.7319	3.22664e-15	8.96174e-14	24.392	stable
LOC331102	0.938429	5.9042	16.7315	3.2283e-15	8.96174e-14	24.3914	stable
Wbp5	0.896103	7.90905	16.7306	3.23262e-15	8.96567e-14	24.3901	stable
P2ry5	0.943664	6.07038	16.729	3.23969e-15	8.9772e-14	24.3878	stable
Cdk2	-0.841114	6.45952	-16.7258	3.25437e-15	9.0098e-14	24.3832	stable
Rps27l	-0.826583	9.13725	-16.7223	3.27003e-15	9.04502e-14	24.3782	stable
Acaa2	0.871358	5.17492	16.7133	3.31134e-15	9.1511e-14	24.3653	stable
Rod1	-0.909067	3.85883	-16.7102	3.32591e-15	9.17626e-14	24.3608	stable
2310051F07Rik	1.32029	6.83719	16.7101	3.32639e-15	9.17626e-14	24.3606	stable
2810410A03Rik	0.875814	6.22629	16.6989	3.37867e-15	9.31215e-14	24.3446	stable
Mylc2pl	-0.788368	2.36716	-16.6781	3.47831e-15	9.57823e-14	24.3147	stable
Ppan	-0.934861	5.49234	-16.6711	3.51254e-15	9.65719e-14	24.3046	stable
Klhl17	0.918523	5.15176	16.671	3.51324e-15	9.65719e-14	24.3044	stable
Actl6a	-0.878328	4.69987	-16.6344	3.69782e-15	1.01555e-13	24.2517	stable
Rras	0.793396	5.4776	16.6252	3.74588e-15	1.02784e-13	24.2384	stable
Lsm4	-1.02481	7.92117	-16.6195	3.77584e-15	1.03514e-13	24.2303	stable
Tes	-0.799395	6.65454	-16.6073	3.84132e-15	1.05215e-13	24.2126	stable
Klf4	-1.00582	2.73843	-16.6001	3.88035e-15	1.0619e-13	24.2022	stable
A630082K20Rik	0.901005	2.43896	16.597	3.89706e-15	1.06553e-13	24.1977	stable
H2-D4	1.17856	2.77277	16.5949	3.90846e-15	1.0677e-13	24.1947	stable
Npm3-ps1	-0.98184	5.23657	-16.5738	4.02603e-15	1.09885e-13	24.1642	stable
Mrpl37	-0.877937	6.50365	-16.5695	4.05036e-15	1.10451e-13	24.158	stable
1110057K04Rik	0.842932	5.24078	16.5471	4.18031e-15	1.13894e-13	24.1255	stable
Pmf1	-1.03618	3.63809	-16.5459	4.18714e-15	1.1398e-13	24.1239	stable
Prep	-0.884712	5.88931	-16.5426	4.20696e-15	1.14418e-13	24.119	stable
Gab1	0.991238	4.45935	16.5403	4.22025e-15	1.14679e-13	24.1158	stable
Klk1b4	-0.789338	3.44873	-16.5263	4.30479e-15	1.16873e-13	24.0954	stable
Clcn7	0.790827	7.39594	16.5212	4.33543e-15	1.17601e-13	24.0881	stable
1110068E08Rik	0.913811	5.1492	16.5103	4.40304e-15	1.19331e-13	24.0721	stable
Kif5c	0.812325	3.02511	16.5086	4.41324e-15	1.19502e-13	24.0698	stable
Clecsf9	0.997339	5.19674	16.4847	4.56464e-15	1.23493e-13	24.035	stable
Pycrl	-0.833138	5.02176	-16.4822	4.58102e-15	1.23828e-13	24.0314	stable
A430106D13Rik	0.902224	3.5426	16.4542	4.76588e-15	1.28712e-13	23.9907	stable
Folr2	-1.07005	6.35822	-16.4454	4.82562e-15	1.30211e-13	23.9778	stable
Tmem180	-0.882856	5.68934	-16.4435	4.8382e-15	1.30437e-13	23.9752	stable
Shmt1	-0.788188	2.74732	-16.4427	4.84383e-15	1.30475e-13	23.974	stable
Myoz1	-0.727656	2.31887	-16.4297	4.93357e-15	1.32776e-13	23.9551	stable
Lrrc25	-0.867342	4.00723	-16.3887	5.22943e-15	1.40616e-13	23.8952	stable
Faim3	-0.940329	2.44651	-16.3856	5.2526e-15	1.41116e-13	23.8906	stable
LOC677180	-0.732428	4.04784	-16.3847	5.25902e-15	1.41166e-13	23.8893	stable
Rcsd1	-1.05234	5.66892	-16.3567	5.47269e-15	1.46774e-13	23.8484	stable
Mertk	1.01293	2.46774	16.342	5.58785e-15	1.49732e-13	23.8269	stable
Ly6a	-0.926013	5.30579	-16.3247	5.72693e-15	1.53326e-13	23.8016	stable
Ccdc124	-0.784962	6.72059	-16.3241	5.73224e-15	1.53335e-13	23.8007	stable
Map4k1	-0.768259	3.9328	-16.3219	5.74974e-15	1.5367e-13	23.7975	stable
D930028F11Rik	0.883353	2.70725	16.3111	5.83921e-15	1.55926e-13	23.7817	stable
Heca	0.846831	3.36115	16.279	6.1129e-15	1.63093e-13	23.7345	stable
F630001K14Rik	1.10656	4.82187	16.2733	6.16273e-15	1.64281e-13	23.7262	stable
Wfs1	0.953921	3.98126	16.2673	6.21528e-15	1.65539e-13	23.7174	stable
Oas2	0.961455	4.33984	16.2655	6.2315e-15	1.65828e-13	23.7148	stable
Slc38a6	0.841682	4.66991	16.2609	6.27224e-15	1.66768e-13	23.708	stable
Psmb4	-0.730407	9.04322	-16.241	6.454e-15	1.71453e-13	23.6786	stable
Zwint	-0.889499	4.32766	-16.2393	6.46907e-15	1.71706e-13	23.6763	stable
Fbxo31	-1.02947	3.5752	-16.2267	6.58666e-15	1.74677e-13	23.6577	stable
Gstm1	0.907079	7.89655	16.223	6.62156e-15	1.75451e-13	23.6523	stable
Itprip	-0.872747	3.05495	-16.2216	6.63566e-15	1.75602e-13	23.6501	stable
Mfap1b	0.953634	5.31229	16.2212	6.63863e-15	1.75602e-13	23.6496	stable
Rnf213	0.816187	7.10364	16.2103	6.74384e-15	1.78232e-13	23.6334	stable
Rnf167	0.863557	4.67267	16.2093	6.75286e-15	1.78318e-13	23.6321	stable
Tnni2	-1.01608	4.78652	-16.2085	6.76085e-15	1.78377e-13	23.6309	stable
Cd47	0.822875	6.55493	16.1993	6.85069e-15	1.80593e-13	23.6173	stable
Snrpb	-0.772737	5.96554	-16.1883	6.95907e-15	1.83293e-13	23.6011	stable
Alg10b	-0.829451	4.04182	-16.1874	6.96814e-15	1.83376e-13	23.5998	stable
Ints1	-0.887423	5.76913	-16.1867	6.97555e-15	1.83414e-13	23.5987	stable
Rnu65	-0.780269	4.05712	-16.1707	7.13703e-15	1.875e-13	23.5751	stable
BC046331	-0.844751	4.26696	-16.1665	7.18094e-15	1.88494e-13	23.5688	stable
Ccne1	-0.8892	2.94783	-16.1549	7.30138e-15	1.91492e-13	23.5517	stable
Gmppb	-0.996495	3.25413	-16.1364	7.49757e-15	1.9635e-13	23.5244	stable
Vps36	-0.810349	5.55508	-16.1363	7.49933e-15	1.9635e-13	23.5242	stable
Prnp	0.809019	6.9953	16.1335	7.52886e-15	1.96956e-13	23.5201	stable
2410004N11Rik	0.903379	3.30084	16.1291	7.5766e-15	1.97925e-13	23.5136	stable
Tbc1d15	0.807851	5.78815	16.1289	7.57871e-15	1.97925e-13	23.5133	stable
Fen1	-0.914096	6.76151	-16.1227	7.64649e-15	1.99526e-13	23.5042	stable
Igf2r	0.892034	6.44712	16.1059	7.83448e-15	2.04259e-13	23.4792	stable
Rell1	0.878634	5.34228	16.1009	7.89047e-15	2.05545e-13	23.4719	stable
EG434907	-0.756224	2.12723	-16.0972	7.93318e-15	2.06483e-13	23.4663	stable
Trim28	-0.778011	6.97882	-16.0946	7.96223e-15	2.07065e-13	23.4625	stable
Clip1	0.736765	5.34992	16.0921	7.99168e-15	2.07656e-13	23.4587	stable
Adrm1	-0.750236	5.89203	-16.0903	8.01262e-15	2.08025e-13	23.456	stable
Nme2	-0.84705	9.02591	-16.0878	8.04122e-15	2.08592e-13	23.4524	stable
Cugbp1	0.894524	3.83266	16.0826	8.10143e-15	2.09977e-13	23.4447	stable
Tmem168	1.04979	2.56843	16.0818	8.11142e-15	2.1006e-13	23.4434	stable
Ddit3	0.792624	5.57417	16.0761	8.17814e-15	2.1161e-13	23.435	stable
AW228700	0.715802	4.57973	16.0755	8.18515e-15	2.11614e-13	23.4341	stable
D730003I15Rik	0.906534	3.26339	16.0631	8.33277e-15	2.1525e-13	23.4157	stable
Col6a3	0.808057	2.21049	16.06	8.36944e-15	2.16017e-13	23.4112	stable
Cep78	-0.844146	3.93526	-16.0494	8.49912e-15	2.19181e-13	23.3954	stable
Diras2	-0.725626	2.77061	-16.0433	8.5745e-15	2.2094e-13	23.3863	stable
Irf7	1.06462	3.44921	16.038	8.63986e-15	2.22438e-13	23.3785	stable
LOC381285	1.04072	4.17759	16.0348	8.68021e-15	2.23291e-13	23.3737	stable
Slc6a13	-1.20742	2.74697	-16.0329	8.70375e-15	2.2371e-13	23.3709	stable
Sdf4	0.824567	3.78834	16.0231	8.82758e-15	2.26704e-13	23.3564	stable
E030040L08Rik	1.08862	4.44202	16.0097	9.00107e-15	2.30968e-13	23.3363	stable
2510039O18Rik	-0.956559	5.33467	-15.9983	9.15021e-15	2.346e-13	23.3194	stable
Rpa1	-0.975813	7.15044	-15.9739	9.4796e-15	2.42843e-13	23.283	stable
Rnf26	-0.843402	6.10866	-15.9723	9.50231e-15	2.43028e-13	23.2806	stable
Slc9a9	0.848547	3.57501	15.9723	9.50255e-15	2.43028e-13	23.2805	stable
Septin 8	0.791597	5.76401	15.9561	9.72797e-15	2.48587e-13	23.2564	stable
Tubg1	-1.07171	4.25837	-15.9543	9.75373e-15	2.49039e-13	23.2537	stable
LOC100044103	-0.704433	4.0525	-15.9518	9.78891e-15	2.49731e-13	23.25	stable
AI451617	1.15052	3.15305	15.937	1.0002e-14	2.54956e-13	23.2278	stable
Cdt1	-0.95953	6.60369	-15.9236	1.01979e-14	2.59734e-13	23.2079	stable
Wdr6	-0.931043	4.0194	-15.9134	1.0351e-14	2.63416e-13	23.1925	stable
LOC100041835	-0.802376	8.08726	-15.9012	1.0536e-14	2.67905e-13	23.1743	stable
Pip4k2b	-0.942014	5.92506	-15.8966	1.06065e-14	2.69475e-13	23.1674	stable
Paip2b	0.783896	2.4621	15.8956	1.06222e-14	2.69652e-13	23.1659	stable
Rad51c	-0.814843	2.35921	-15.8936	1.06529e-14	2.7021e-13	23.1629	stable
Timm50	-1.06329	5.29386	-15.8875	1.07482e-14	2.72402e-13	23.1538	stable
2900001A12Rik	0.82146	2.57719	15.8811	1.0848e-14	2.74707e-13	23.1443	stable
4930470O13Rik	0.874842	3.64707	15.8784	1.0892e-14	2.75595e-13	23.1401	stable
1700113I22Rik	-1.36341	2.86001	-15.8725	1.09859e-14	2.77567e-13	23.1313	stable
3830432E14Rik	0.845982	2.3918	15.8723	1.0988e-14	2.77567e-13	23.1311	stable
2810430B18Rik	-0.907649	2.67433	-15.8707	1.1014e-14	2.77997e-13	23.1286	stable
AW112037	0.7494	4.96722	15.8658	1.10924e-14	2.79749e-13	23.1213	stable
Pdia4	-0.887098	5.54854	-15.8652	1.11021e-14	2.79763e-13	23.1204	stable
Mars2	-1.07394	3.679	-15.8635	1.1131e-14	2.80263e-13	23.1178	stable
Bcl2	-0.776079	2.74061	-15.8627	1.11432e-14	2.80341e-13	23.1166	stable
Mt1	-0.75516	9.71383	-15.8495	1.13599e-14	2.85561e-13	23.0968	stable
Acap3	-0.787279	4.80913	-15.8443	1.14459e-14	2.8749e-13	23.0891	stable
LOC100042405	-0.887651	7.45514	-15.8392	1.15322e-14	2.89422e-13	23.0813	stable
Golgb1	0.772612	5.25876	15.8319	1.16556e-14	2.9228e-13	23.0704	stable
Erh	-0.836263	7.05877	-15.8302	1.16848e-14	2.92732e-13	23.0678	stable
LOC100046136	0.895856	3.79685	15.8297	1.16926e-14	2.92732e-13	23.0671	stable
Map3k6	-0.826155	2.96594	-15.8236	1.17983e-14	2.9514e-13	23.0578	stable
LOC100043671	-0.798772	5.83378	-15.8203	1.18553e-14	2.96324e-13	23.0529	stable
Chn2	-0.80263	3.39628	-15.8161	1.19279e-14	2.97898e-13	23.0466	stable
Tagln2	-0.823737	8.23242	-15.8117	1.2005e-14	2.99581e-13	23.04	stable
LOC100040799	-0.813453	3.03859	-15.8095	1.20442e-14	3.00316e-13	23.0366	stable
Gnat3	-0.930038	2.84901	-15.8003	1.22073e-14	3.04137e-13	23.0228	stable
Nuak1	0.861248	4.37435	15.7976	1.22549e-14	3.04936e-13	23.0188	stable
Ifi47	0.817555	3.94497	15.7974	1.22591e-14	3.04936e-13	23.0184	stable
Pea15	0.828209	7.77496	15.7922	1.23521e-14	3.07001e-13	23.0106	stable
Evl	1.31483	5.76906	15.7882	1.24245e-14	3.08553e-13	23.0046	stable
Foxk2	-0.823684	5.05254	-15.7786	1.25997e-14	3.12654e-13	22.9902	stable
Ripk3	-0.947902	3.61423	-15.7754	1.26599e-14	3.13895e-13	22.9853	stable
Clec2i	-0.759112	2.45608	-15.7701	1.27591e-14	3.16101e-13	22.9773	stable
Narf	-0.743175	3.16556	-15.7641	1.28712e-14	3.18623e-13	22.9683	stable
scl0002124.1_39	0.820397	3.15221	15.7502	1.31362e-14	3.2492e-13	22.9473	stable
Zfp313	1.37231	4.19978	15.7409	1.33162e-14	3.2911e-13	22.9333	stable
BC026585	0.874902	4.43415	15.738	1.33724e-14	3.30234e-13	22.929	stable
Tmod3	0.745588	5.01286	15.7271	1.35888e-14	3.35311e-13	22.9124	stable
Cd164	-0.803482	7.38302	-15.7256	1.36184e-14	3.35771e-13	22.9102	stable
Asns	-1.06728	2.64082	-15.7224	1.36822e-14	3.37075e-13	22.9054	stable
Pard6a	-0.797119	3.86712	-15.7194	1.37431e-14	3.38306e-13	22.9008	stable
AW146242	0.842542	4.97387	15.7055	1.40279e-14	3.45041e-13	22.8797	stable
Trps1	0.836277	3.9507	15.6886	1.43797e-14	3.53412e-13	22.8542	stable
6230425C21Rik	0.780959	6.43324	15.6794	1.4575e-14	3.57928e-13	22.8403	stable
Fzr1	-0.880106	5.83547	-15.6769	1.46294e-14	3.58977e-13	22.8365	stable
D17Wsu92e	1.01487	4.18757	15.6497	1.52279e-14	3.73367e-13	22.7952	stable
B230339H12Rik	0.833576	4.44343	15.6462	1.53058e-14	3.74979e-13	22.79	stable
Rhobtb2	-0.889739	2.95665	-15.6405	1.54366e-14	3.77885e-13	22.7812	stable
Acadl	0.876405	4.60825	15.6291	1.56978e-14	3.83975e-13	22.764	stable
Hip1	0.901332	3.34777	15.6285	1.57127e-14	3.84034e-13	22.763	stable
Prss34	-0.845423	3.24428	-15.6277	1.57294e-14	3.84138e-13	22.7619	stable
Ergic3	0.801208	5.79681	15.6268	1.57512e-14	3.84368e-13	22.7605	stable
Asb1	-0.813901	3.21576	-15.6245	1.58038e-14	3.85345e-13	22.757	stable
scl0003131.1_3	-0.82108	2.95108	-15.6154	1.60175e-14	3.90247e-13	22.7432	stable
Kat2b	0.773268	2.64993	15.6093	1.61633e-14	3.9349e-13	22.7339	stable
Dbp	0.954533	6.03306	15.6036	1.62997e-14	3.96497e-13	22.7252	stable
1190005F20Rik	0.888491	3.35848	15.5947	1.65148e-14	4.01413e-13	22.7117	stable
A430103B12Rik	0.980499	2.51652	15.586	1.673e-14	4.06325e-13	22.6984	stable
Cdk10	1.04803	3.2862	15.5724	1.70705e-14	4.14269e-13	22.6777	stable
Vegfa	0.85119	4.10135	15.5554	1.7504e-14	4.24455e-13	22.6519	stable
Mill2	0.97177	2.15711	15.5295	1.81903e-14	4.40751e-13	22.6123	stable
LOC100047712	-0.871903	4.58248	-15.5269	1.82607e-14	4.4211e-13	22.6083	stable
2610203C22Rik	-0.83415	3.21294	-15.5189	1.848e-14	4.47069e-13	22.596	stable
Rap1gap	0.821181	2.86028	15.5141	1.86105e-14	4.49874e-13	22.5888	stable
Tlr2	0.824934	6.5583	15.5021	1.89463e-14	4.57631e-13	22.5704	stable
Cmtm4	-0.881156	5.66754	-15.4913	1.92525e-14	4.64663e-13	22.5539	stable
Tceb2	-0.705608	8.49203	-15.48	1.95772e-14	4.72131e-13	22.5367	stable
Cdr2	-0.947323	4.41511	-15.4729	1.97869e-14	4.76816e-13	22.5257	stable
Ube1l	0.786965	6.08101	15.4608	2.0147e-14	4.85116e-13	22.5071	stable
D4Ertd22e	-0.841253	4.99558	-15.451	2.0442e-14	4.91835e-13	22.4922	stable
4932415G12Rik	0.729423	3.27881	15.4465	2.05784e-14	4.94731e-13	22.4853	stable
Sh3bgrl2	0.873769	5.41661	15.4426	2.0701e-14	4.9729e-13	22.4792	stable
Gsdmdc1	0.805586	6.10852	15.442	2.07186e-14	4.97328e-13	22.4783	stable
Ctla2b	-0.925853	2.72111	-15.4411	2.07463e-14	4.97606e-13	22.477	stable
Fcna	0.939161	5.48883	15.4341	2.0963e-14	5.02413e-13	22.4663	stable
Rsrc2	0.814256	5.14135	15.4322	2.10221e-14	5.03393e-13	22.4634	stable
Ecsit	-0.800851	3.81997	-15.4318	2.10365e-14	5.03393e-13	22.4627	stable
Alkbh7	-1.0754	5.11497	-15.4281	2.11523e-14	5.05772e-13	22.457	stable
1810009N02Rik	-0.812188	4.78071	-15.4123	2.1655e-14	5.17391e-13	22.4328	stable
Cnr2	0.743537	4.88586	15.4087	2.17733e-14	5.19814e-13	22.4272	stable
6330569M22Rik	-0.696781	6.60455	-15.4068	2.18342e-14	5.20866e-13	22.4244	stable
Mif4gd	0.764091	5.47035	15.4059	2.18634e-14	5.21159e-13	22.423	stable
H2-K1	1.09732	6.75362	15.4032	2.19541e-14	5.22917e-13	22.4187	stable
Itfg3	0.813241	7.0067	15.3999	2.20622e-14	5.25088e-13	22.4137	stable
Nme1	-0.919355	8.49165	-15.3981	2.21196e-14	5.26048e-13	22.411	stable
Pqlc3	0.812423	6.58328	15.3882	2.24509e-14	5.33517e-13	22.3957	stable
Sec61b	-0.846566	5.78398	-15.3841	2.25899e-14	5.35744e-13	22.3893	stable
Krtcap2	-0.797976	8.40221	-15.3839	2.25961e-14	5.35744e-13	22.3891	stable
Spin1	0.805351	2.32989	15.3839	2.25968e-14	5.35744e-13	22.389	stable
Sdpr	-0.879255	2.9798	-15.3817	2.26686e-14	5.37036e-13	22.3858	stable
Ppp2r5b	-0.809301	3.26418	-15.3726	2.29792e-14	5.43975e-13	22.3717	stable
5930434B04Rik	0.820556	3.90146	15.3718	2.30089e-14	5.44261e-13	22.3704	stable
Mrpl28	-0.94666	7.56039	-15.3495	2.37887e-14	5.62166e-13	22.3361	stable
Numa1	0.826598	4.02384	15.3491	2.38022e-14	5.62166e-13	22.3355	stable
Rab6b	0.814825	2.67788	15.3439	2.39875e-14	5.66108e-13	22.3275	stable
2610200O14Rik	-1.01972	3.92285	-15.3433	2.40099e-14	5.66204e-13	22.3266	stable
Abhd11	-0.742382	4.7351	-15.3354	2.4298e-14	5.72561e-13	22.3143	stable
LOC623121	0.887607	2.73553	15.3299	2.44987e-14	5.76851e-13	22.3058	stable
Tens1	0.83767	5.58359	15.3204	2.48485e-14	5.84266e-13	22.2913	stable
Kcnj2	1.08127	2.89692	15.3203	2.48515e-14	5.84266e-13	22.2911	stable
E130301L11Rik	-0.846038	1.97434	-15.3114	2.51889e-14	5.91747e-13	22.2772	stable
A430024H01Rik	-0.808204	3.30785	-15.2961	2.5773e-14	6.05009e-13	22.2537	stable
Tbrg4	-0.954456	5.34617	-15.2948	2.5824e-14	6.05745e-13	22.2516	stable
Eif6	-0.695833	7.60483	-15.2896	2.60254e-14	6.10005e-13	22.2436	stable
2310038D14Rik	0.856005	3.97881	15.2817	2.63374e-14	6.1685e-13	22.2314	stable
2310061F22Rik	-0.908223	6.06445	-15.2765	2.65422e-14	6.20864e-13	22.2234	stable
Slu7	0.860134	2.65204	15.2764	2.6549e-14	6.20864e-13	22.2231	stable
Suv420h1	0.717239	4.61047	15.2735	2.66615e-14	6.23023e-13	22.2188	stable
Esam	-0.769569	3.38943	-15.2659	2.69712e-14	6.29785e-13	22.2069	stable
Nup50	0.849266	3.43446	15.2539	2.74618e-14	6.40755e-13	22.1883	stable
Dut	-0.97731	2.87631	-15.251	2.75804e-14	6.43036e-13	22.1839	stable
LOC331595	-0.698312	2.15817	-15.2367	2.81833e-14	6.56596e-13	22.1616	stable
Eif2s2	-0.753768	5.99357	-15.2296	2.84836e-14	6.62681e-13	22.1507	stable
Pola2	-0.802159	3.90718	-15.2295	2.84874e-14	6.62681e-13	22.1506	stable
Pfas	-0.830568	4.44056	-15.2209	2.88589e-14	6.70818e-13	22.1372	stable
Dusp16	-0.791089	3.25596	-15.2183	2.89746e-14	6.72999e-13	22.1331	stable
Gfod2	-0.845896	2.52676	-15.2085	2.94042e-14	6.82465e-13	22.118	stable
Sft2d2	0.792601	6.47956	15.2034	2.96326e-14	6.87249e-13	22.11	stable
LOC100044842	-0.860483	2.6763	-15.2022	2.96873e-14	6.88001e-13	22.1081	stable
Nsmce2	0.922852	3.83044	15.2006	2.97603e-14	6.89174e-13	22.1056	stable
Isy1	-0.741506	5.6476	-15.1797	3.07117e-14	7.10673e-13	22.0732	stable
Ttc39b	0.699204	2.47153	15.1787	3.07585e-14	7.11223e-13	22.0716	stable
Map4k3	0.755063	5.68016	15.1734	3.10049e-14	7.16385e-13	22.0634	stable
Tnf	-0.820917	4.37587	-15.1712	3.11085e-14	7.18185e-13	22.06	stable
Zw10	-0.742556	4.857	-15.1708	3.11293e-14	7.18185e-13	22.0593	stable
Npy	0.752864	7.57007	15.1696	3.11837e-14	7.18901e-13	22.0575	stable
Dph1	-0.717276	5.78706	-15.1678	3.12711e-14	7.20378e-13	22.0546	stable
Vps39	0.70701	3.32338	15.1666	3.13251e-14	7.21086e-13	22.0528	stable
4732458O05Rik	0.855202	4.81796	15.1645	3.14258e-14	7.22863e-13	22.0495	stable
Bop1	-1.07217	4.33318	-15.1618	3.15548e-14	7.25291e-13	22.0453	stable
C130078B07Rik	0.868283	2.38402	15.1496	3.21417e-14	7.38232e-13	22.0264	stable
Dbndd2	0.967537	6.95869	15.1481	3.22156e-14	7.39377e-13	22.024	stable
Ccdc134	-0.842108	3.89078	-15.1472	3.22625e-14	7.39904e-13	22.0225	stable
Slc35b3	0.820311	6.32782	15.1348	3.28731e-14	7.53349e-13	22.0032	stable
Rbbp4	-0.777237	3.41805	-15.1333	3.29486e-14	7.54518e-13	22.0008	stable
AI551093	0.852132	4.10777	15.1324	3.29905e-14	7.54917e-13	21.9995	stable
Lama3	-0.753537	2.32142	-15.1295	3.31369e-14	7.57323e-13	21.995	stable
Klf9	0.864999	4.86974	15.1294	3.31447e-14	7.57323e-13	21.9947	stable
Ambp	-0.819666	2.02607	-15.1179	3.37233e-14	7.69973e-13	21.9769	stable
Snrk	0.78107	2.46683	15.1116	3.40466e-14	7.7678e-13	21.9671	stable
Ask-pending	-0.721657	2.35023	-15.103	3.4496e-14	7.86453e-13	21.9536	stable
Ube2t	-0.863782	2.1282	-15.1025	3.45246e-14	7.86524e-13	21.9527	stable
Med18	-0.772292	4.66327	-15.1002	3.46445e-14	7.88674e-13	21.9492	stable
LOC100046056	-0.84432	4.66078	-15.0946	3.49369e-14	7.94743e-13	21.9405	stable
Men1	-0.740711	4.98464	-15.081	3.56673e-14	8.09971e-13	21.9192	stable
EG216185	-0.879137	7.25108	-15.0808	3.56773e-14	8.09971e-13	21.9189	stable
Atp5d	-0.762521	7.40317	-15.0807	3.5685e-14	8.09971e-13	21.9187	stable
2310005L22Rik	0.766785	4.68785	15.0741	3.60417e-14	8.17467e-13	21.9085	stable
Siat7f	1.03472	2.84676	15.0665	3.64629e-14	8.26412e-13	21.8965	stable
Zfp429	0.920593	3.55875	15.0577	3.69533e-14	8.36912e-13	21.8828	stable
Hfe	0.955086	3.59816	15.0444	3.771e-14	8.53424e-13	21.8619	stable
Ube2o	-0.740611	5.6501	-15.0413	3.7889e-14	8.56847e-13	21.857	stable
Tbc1d10a	1.08659	3.08636	15.0341	3.83051e-14	8.65623e-13	21.8458	stable
Serpinh1	0.821674	3.7686	15.0284	3.86373e-14	8.7249e-13	21.8369	stable
Tmed1	-0.834083	4.08141	-15.0271	3.87187e-14	8.7369e-13	21.8347	stable
Lxn	-0.755479	6.17372	-15.0174	3.92919e-14	8.85977e-13	21.8196	stable
Klhl25	-0.906415	2.98146	-15.0158	3.93885e-14	8.86927e-13	21.8171	stable
9030216K14Rik	0.770068	3.23536	15.0158	3.93915e-14	8.86927e-13	21.817	stable
H2-D1	0.748621	9.60811	15.0125	3.95877e-14	8.90694e-13	21.8119	stable
Gpi1	-0.881144	2.90495	-15.0028	4.01797e-14	9.03356e-13	21.7966	stable
Hist1h2bm	1.00898	6.02114	15.0015	4.02549e-14	9.04389e-13	21.7947	stable
scl0001118.1_0	-1.01032	4.14729	-15.0001	4.03425e-14	9.05696e-13	21.7925	stable
Hist1h2bg	0.87333	2.60068	14.9954	4.06358e-14	9.11618e-13	21.785	stable
Abcc4	-0.715985	4.71142	-14.9914	4.08855e-14	9.16554e-13	21.7787	stable
E130301F21Rik	0.775371	2.96716	14.9886	4.10584e-14	9.19761e-13	21.7743	stable
scl0002069.1_48	-0.812207	3.43768	-14.9869	4.1162e-14	9.21414e-13	21.7718	stable
Ars2	-0.901936	5.22683	-14.9844	4.1322e-14	9.24085e-13	21.7678	stable
Med15	1.03993	3.60694	14.984	4.13488e-14	9.24085e-13	21.7671	stable
Gadd45b	1.11373	3.22706	14.9836	4.13712e-14	9.24085e-13	21.7665	stable
LOC214403	1.01544	2.90601	14.9783	4.17072e-14	9.30918e-13	21.7582	stable
Tns3	0.76437	7.66407	14.973	4.2048e-14	9.37846e-13	21.7498	stable
6030429G01Rik	0.997861	3.10953	14.965	4.25634e-14	9.48648e-13	21.7373	stable
2310016C08Rik	0.858846	4.07873	14.9646	4.25937e-14	9.48648e-13	21.7366	stable
Ypel5	0.72846	6.83884	14.9497	4.35722e-14	9.69741e-13	21.7132	stable
Fchsd2	0.688438	5.25638	14.9467	4.3773e-14	9.73508e-13	21.7084	stable
Trim33	0.71543	3.42434	14.9461	4.38116e-14	9.73665e-13	21.7075	stable
B9d2	-0.848331	4.15397	-14.9427	4.40416e-14	9.78072e-13	21.7021	stable
Cryba4	-0.762469	3.45527	-14.9373	4.44105e-14	9.85557e-13	21.6936	stable
Rufy1	0.734828	5.49205	14.9338	4.46473e-14	9.90099e-13	21.6881	stable
Akap8l	0.779463	4.87292	14.9319	4.47797e-14	9.92322e-13	21.685	stable
Ufsp1	-0.695598	3.09081	-14.921	4.55282e-14	1.00819e-12	21.668	stable
1500031L02Rik	-0.76056	4.78439	-14.9138	4.6035e-14	1.01868e-12	21.6566	stable
Bnip3l	0.746435	7.07394	14.9087	4.63954e-14	1.02571e-12	21.6486	stable
Hist1h2bj	0.994907	7.12787	14.9084	4.64193e-14	1.02571e-12	21.648	stable
LOC268569	-0.858559	8.99045	-14.9049	4.66686e-14	1.03048e-12	21.6425	stable
1700108L22Rik	-0.829234	2.87882	-14.9023	4.68592e-14	1.03395e-12	21.6383	stable
Il8rb	-0.808206	2.10916	-14.9004	4.69952e-14	1.03621e-12	21.6353	stable
Pias1	0.73762	5.96568	14.891	4.76756e-14	1.04975e-12	21.6205	stable
Trappc3	0.905994	5.0608	14.891	4.76771e-14	1.04975e-12	21.6205	stable
Sec61a1	-0.75204	6.10514	-14.8832	4.82523e-14	1.06165e-12	21.6082	stable
1500031H01Rik	0.947596	2.74971	14.8784	4.86049e-14	1.06865e-12	21.6007	stable
LOC545208	1.11706	5.41119	14.877	4.87133e-14	1.07027e-12	21.5984	stable
Zfp219	1.07096	5.30467	14.8751	4.88527e-14	1.07257e-12	21.5954	stable
Myo1f	0.845086	8.48281	14.8666	4.94964e-14	1.08593e-12	21.582	stable
Srd5a3	0.73736	6.76331	14.8544	5.04341e-14	1.10564e-12	21.5626	stable
B3gat3	-0.754869	4.31523	-14.854	5.04666e-14	1.10564e-12	21.562	stable
2810021O14Rik	-0.818946	5.37516	-14.8499	5.07824e-14	1.11177e-12	21.5556	stable
Lgals8	0.863655	6.198	14.8461	5.10801e-14	1.1175e-12	21.5495	stable
Psme3	-0.690892	6.26169	-14.8406	5.15142e-14	1.1262e-12	21.5408	stable
Il12rb2	0.721025	2.45291	14.8398	5.15801e-14	1.12684e-12	21.5395	stable
D830014B20Rik	0.825611	3.22199	14.8389	5.1647e-14	1.1275e-12	21.5382	stable
Trim59	-0.903956	2.17461	-14.8293	5.24215e-14	1.1436e-12	21.5229	stable
Mum1	-1.01081	6.25581	-14.8227	5.29519e-14	1.15436e-12	21.5125	stable
Clspn	-0.837766	2.16966	-14.8217	5.30382e-14	1.15542e-12	21.5108	stable
Cyth4	1.21894	3.70063	14.8122	5.38158e-14	1.17154e-12	21.4958	stable
LOC672705	0.893105	3.09231	14.8111	5.39094e-14	1.17275e-12	21.494	stable
Dph2l1	-0.669148	6.06541	-14.8051	5.4415e-14	1.18291e-12	21.4844	stable
AU022252	-0.79467	3.5608	-14.8003	5.4813e-14	1.19073e-12	21.4769	stable
Kti12	-0.904713	3.69468	-14.798	5.50063e-14	1.19409e-12	21.4733	stable
Tmcc3	0.835817	2.57441	14.7963	5.51541e-14	1.19645e-12	21.4706	stable
Arl8b	0.703712	7.808	14.7871	5.59398e-14	1.21265e-12	21.456	stable
Psmb2	-0.809654	8.21326	-14.7712	5.73349e-14	1.24201e-12	21.4306	stable
F630111L10Rik	0.73824	2.24746	14.766	5.77987e-14	1.25118e-12	21.4223	stable
Gpnmb	0.735351	7.52166	14.7643	5.79509e-14	1.2536e-12	21.4196	stable
Rnpep	-0.726068	7.50496	-14.7625	5.81085e-14	1.25613e-12	21.4168	stable
9530020G05Rik	0.958494	4.64243	14.7562	5.86778e-14	1.26755e-12	21.4068	stable
Zfp238	0.718446	4.18908	14.7503	5.92156e-14	1.27827e-12	21.3974	stable
Gpx3	0.76538	6.69557	14.7405	6.01195e-14	1.29688e-12	21.3818	stable
Mfsd10	-0.688835	6.23548	-14.7396	6.02039e-14	1.29779e-12	21.3804	stable
1110032A13Rik	-0.939691	5.08847	-14.7389	6.02725e-14	1.29836e-12	21.3792	stable
Pcyox1	0.901804	6.5514	14.7356	6.05758e-14	1.30398e-12	21.374	stable
Rrp15	-0.84692	4.99053	-14.7351	6.06244e-14	1.30412e-12	21.3732	stable
Sorbs3	0.762936	2.54083	14.7337	6.07596e-14	1.30612e-12	21.3709	stable
Letmd1	0.760692	5.76877	14.728	6.12969e-14	1.31675e-12	21.3619	stable
Rabl4	-0.82005	4.0644	-14.7249	6.15892e-14	1.32211e-12	21.357	stable
Rock1	0.87571	4.1474	14.7242	6.16555e-14	1.32262e-12	21.3559	stable
Rnf8	0.943864	2.84703	14.7097	6.30596e-14	1.3518e-12	21.3327	stable
Nt5c2	1.0467	2.89777	14.7013	6.38826e-14	1.36849e-12	21.3193	stable
Cytip	-0.834041	5.42764	-14.6998	6.40319e-14	1.37074e-12	21.3169	stable
Dcun1d5	-0.832222	5.49657	-14.6962	6.43942e-14	1.37741e-12	21.3111	stable
Hdhd2	0.765617	3.74094	14.6958	6.44331e-14	1.37741e-12	21.3105	stable
Pscd3	0.765427	6.06642	14.6867	6.53496e-14	1.39604e-12	21.296	stable
Cbx8	-0.855225	3.19085	-14.6822	6.58119e-14	1.40494e-12	21.2887	stable
Cebpa	1.04444	4.49043	14.6789	6.61442e-14	1.41106e-12	21.2835	stable
Ptms	0.911072	5.1414	14.6725	6.68021e-14	1.4238e-12	21.2733	stable
2310043N10Rik	1.8338	5.91568	14.6722	6.68338e-14	1.4238e-12	21.2728	stable
Nudt4	-0.754885	5.01177	-14.6608	6.80349e-14	1.44839e-12	21.2545	stable
AI848100	0.782393	3.81754	14.6497	6.92115e-14	1.47242e-12	21.2369	stable
LOC100044948	-0.989241	6.89914	-14.6435	6.98823e-14	1.48567e-12	21.2269	stable
Ik	0.826454	2.2894	14.6412	7.01321e-14	1.48996e-12	21.2233	stable
Cln3	0.711901	7.66881	14.6382	7.04597e-14	1.49589e-12	21.2185	stable
Tsc22d1	0.763329	2.20848	14.6358	7.07292e-14	1.50058e-12	21.2145	stable
Fancd2	-0.740781	2.13668	-14.6352	7.0792e-14	1.50088e-12	21.2136	stable
Cpeb3	0.777482	4.76555	14.624	7.20408e-14	1.52631e-12	21.1956	stable
Olfml2b	-0.912435	2.80493	-14.603	7.44318e-14	1.57588e-12	21.162	stable
2410022L05Rik	-0.848232	5.65981	-14.59	7.5956e-14	1.60705e-12	21.1411	stable
LOC100041567	0.77666	4.32979	14.5887	7.61103e-14	1.60921e-12	21.139	stable
Hras1	-1.05042	5.23723	-14.5846	7.65997e-14	1.61845e-12	21.1324	stable
Zdhhc14	0.69568	6.17707	14.5717	7.81622e-14	1.65034e-12	21.1117	stable
5530601I19Rik	0.821309	3.08029	14.5586	7.978e-14	1.68334e-12	21.0906	stable
Hist2h2aa2	1.01569	6.7683	14.5574	7.99282e-14	1.68532e-12	21.0887	stable
Zswim1	-0.78066	4.09703	-14.5458	8.13939e-14	1.71505e-12	21.07	stable
A930001N09Rik	0.840578	2.29484	14.5435	8.16901e-14	1.72012e-12	21.0662	stable
Hdc	-0.761136	2.25895	-14.5426	8.18047e-14	1.72061e-12	21.0648	stable
Arpc5	0.787935	6.98354	14.5424	8.18247e-14	1.72061e-12	21.0645	stable
Jtv1	-0.970534	4.68778	-14.5414	8.1956e-14	1.72219e-12	21.0629	stable
Crls1	-0.939452	3.72778	-14.5386	8.23159e-14	1.72858e-12	21.0584	stable
Lamc1	-0.749024	4.69228	-14.5349	8.27853e-14	1.73725e-12	21.0525	stable
Tmem86a	0.730414	7.78155	14.5338	8.29295e-14	1.7391e-12	21.0507	stable
scl0002617.1_582	1.10296	5.80942	14.5243	8.41806e-14	1.76413e-12	21.0353	stable
Rnf126	-0.816305	2.99581	-14.5232	8.4321e-14	1.76588e-12	21.0336	stable
Prkcd	0.720165	7.52294	14.5192	8.48465e-14	1.77568e-12	21.0272	stable
C130085D15Rik	0.791168	4.52656	14.5175	8.50774e-14	1.77931e-12	21.0244	stable
Gpr107	0.818097	5.64725	14.5148	8.54334e-14	1.78435e-12	21.0201	stable
LOC333744	0.861307	4.62918	14.5144	8.5485e-14	1.78435e-12	21.0195	stable
Catnb	0.826188	3.05955	14.5144	8.54918e-14	1.78435e-12	21.0194	stable
Map1lc3a	0.903846	2.94206	14.5005	8.73754e-14	1.82243e-12	20.997	stable
LOC545056	-0.761923	7.15734	-14.4988	8.76105e-14	1.8261e-12	20.9942	stable
Elof1	-0.790427	5.94515	-14.4975	8.77924e-14	1.82865e-12	20.9921	stable
Abcc5	0.825772	2.51287	14.4821	8.99299e-14	1.87191e-12	20.9673	stable
Rab32	-0.688507	7.74393	-14.4678	9.19727e-14	1.91314e-12	20.9442	stable
Cbfb	0.880482	2.88671	14.4571	9.35357e-14	1.94435e-12	20.9268	stable
1190009E20Rik	-0.710369	4.07469	-14.4494	9.46702e-14	1.9666e-12	20.9144	stable
Hist1h2bf	1.01634	7.40797	14.4471	9.502e-14	1.97254e-12	20.9106	stable
Vgll4	-0.950436	3.30791	-14.4413	9.58894e-14	1.98925e-12	20.9013	stable
LOC100045567	-0.787512	7.52026	-14.4386	9.62914e-14	1.99625e-12	20.8969	stable
1600029O10Rik	0.812557	2.59108	14.4376	9.64479e-14	1.99816e-12	20.8953	stable
Sec13	-0.678848	7.89092	-14.4302	9.75766e-14	2.02018e-12	20.8833	stable
Il3ra	0.839646	4.31311	14.4254	9.83163e-14	2.03413e-12	20.8755	stable
Prickle3	-0.836536	6.88661	-14.4243	9.84792e-14	2.03614e-12	20.8738	stable
Ly86	0.90115	7.12978	14.4196	9.9216e-14	2.05e-12	20.8661	stable
B930041F14Rik	-0.791172	3.78722	-14.4082	1.01018e-13	2.08583e-12	20.8476	stable
Ydjc	-1.07661	3.15943	-14.4009	1.02179e-13	2.10828e-12	20.8358	stable
B930037P14Rik	0.812981	3.34088	14.4005	1.02242e-13	2.10828e-12	20.8352	stable
Hpa	0.747967	2.30276	14.3999	1.0234e-13	2.10891e-12	20.8342	stable
Wars	-0.764659	5.1732	-14.3912	1.03754e-13	2.13662e-12	20.8201	stable
Ezh2	-0.808286	3.07977	-14.3861	1.04598e-13	2.15256e-12	20.8118	stable
Eif4ebp1	-0.887318	7.3589	-14.3809	1.05453e-13	2.16871e-12	20.8034	stable
BC002199	0.859776	2.78842	14.3795	1.05686e-13	2.17205e-12	20.8011	stable
Il2rg	0.672261	2.53333	14.3744	1.06539e-13	2.18813e-12	20.7928	stable
Mars	-0.818253	4.0201	-14.3616	1.0872e-13	2.23143e-12	20.772	stable
Fcho1	-0.932366	4.16528	-14.3565	1.09602e-13	2.24804e-12	20.7637	stable
4833439L19Rik	0.858083	2.44281	14.3541	1.10021e-13	2.25515e-12	20.7597	stable
EG433224	0.779485	5.537	14.3477	1.11145e-13	2.27667e-12	20.7493	stable
Gbas	1.22875	3.07535	14.3396	1.12565e-13	2.30423e-12	20.7362	stable
Rfc4	-1.01729	3.48272	-14.3314	1.14047e-13	2.33302e-12	20.7227	stable
Hist1h3c	-0.66342	1.83642	-14.3285	1.14565e-13	2.34206e-12	20.7181	stable
Slc29a3	0.809371	7.07645	14.3235	1.1547e-13	2.35899e-12	20.71	stable
Insig1	-0.913706	4.3159	-14.3217	1.15814e-13	2.36445e-12	20.7069	stable
Cmtm7	-0.727375	7.44571	-14.3167	1.16733e-13	2.38166e-12	20.6988	stable
Rps6kb1	0.676921	2.12995	14.3148	1.17078e-13	2.38711e-12	20.6957	stable
LOC100040243	0.734486	3.91173	14.3119	1.17623e-13	2.39663e-12	20.691	stable
EG622339	-0.667941	9.54113	-14.3093	1.18108e-13	2.40377e-12	20.6867	stable
Acvr1b	0.956859	2.6079	14.3092	1.18129e-13	2.40377e-12	20.6865	stable
4930481A15Rik	0.653414	2.60512	14.3051	1.18889e-13	2.41765e-12	20.6799	stable
Tfrc	0.797806	9.10419	14.3035	1.19184e-13	2.42139e-12	20.6774	stable
Hsbp1	0.743239	6.70973	14.3033	1.1923e-13	2.42139e-12	20.677	stable
LOC100047579	-0.830445	2.82108	-14.2988	1.20081e-13	2.43706e-12	20.6697	stable
C030010B13Rik	0.814372	2.47532	14.2972	1.20389e-13	2.44171e-12	20.667	stable
Cit	-0.699772	1.98478	-14.2781	1.24092e-13	2.51517e-12	20.6358	stable
Mgp	0.654366	2.25861	14.2529	1.29152e-13	2.61601e-12	20.5947	stable
Sc4mol	-0.838417	7.40415	-14.2505	1.29662e-13	2.62461e-12	20.5907	stable
Prmt3	-0.691463	6.2659	-14.2499	1.29776e-13	2.62519e-12	20.5898	stable
Il13ra1	0.797487	3.62436	14.2389	1.32059e-13	2.66964e-12	20.5718	stable
Serpind1	0.834891	1.989	14.2324	1.33432e-13	2.69562e-12	20.5611	stable
Irgb10	0.826782	2.94722	14.2302	1.33903e-13	2.70337e-12	20.5575	stable
Rg9mtd2	-0.812675	3.3847	-14.2243	1.35172e-13	2.72721e-12	20.5478	stable
Tnfrsf1b	1.17205	2.46065	14.2204	1.36013e-13	2.74239e-12	20.5414	stable
Plekhm3	0.775569	6.69121	14.2178	1.3658e-13	2.75202e-12	20.5371	stable
Dmxl1	0.736901	4.99574	14.2113	1.38006e-13	2.77893e-12	20.5265	stable
Prim2	-0.754187	3.65263	-14.1983	1.40887e-13	2.83509e-12	20.5052	stable
Arrdc4	-0.661511	5.64598	-14.1914	1.42454e-13	2.86475e-12	20.4938	stable
Gus-s	-0.691286	6.00354	-14.1906	1.42622e-13	2.86628e-12	20.4926	stable
LOC381501	1.00194	3.52353	14.187	1.4344e-13	2.88084e-12	20.4867	stable
Igfbp6	-0.822441	1.97465	-14.1797	1.45123e-13	2.91274e-12	20.4747	stable
Cd84	1.11325	3.17458	14.166	1.48336e-13	2.97529e-12	20.4522	stable
Eftud2	-0.732584	5.47657	-14.1645	1.48697e-13	2.9806e-12	20.4497	stable
Nola1	-0.788554	6.13672	-14.1534	1.51361e-13	3.03204e-12	20.4314	stable
Pabpc4	-0.712027	6.74161	-14.1505	1.52051e-13	3.04389e-12	20.4267	stable
Arhgap9	0.838656	5.79754	14.1435	1.53765e-13	3.07621e-12	20.4151	stable
Mpeg1	1.00486	8.38999	14.1322	1.56583e-13	3.13054e-12	20.3965	stable
Ass1	-0.823064	3.99554	-14.1297	1.57211e-13	3.14106e-12	20.3923	stable
Rcc1	-0.80271	3.38653	-14.129	1.57384e-13	3.14249e-12	20.3912	stable
Il4i1	0.868085	2.879	14.1262	1.58084e-13	3.15442e-12	20.3866	stable
Fkbp4	-0.869991	7.00594	-14.1226	1.59001e-13	3.17067e-12	20.3807	stable
Cdc42ep2	0.873709	3.8901	14.1163	1.60601e-13	3.20051e-12	20.3704	stable
Ppp2r2d	-0.725348	5.20538	-14.1153	1.60856e-13	3.20261e-12	20.3687	stable
H2-Ke6	0.896877	5.64239	14.1151	1.60914e-13	3.20261e-12	20.3684	stable
Scgb1a1	0.847098	2.37086	14.1133	1.61376e-13	3.20974e-12	20.3654	stable
Dnmt1	-0.875169	5.82356	-14.1126	1.61556e-13	3.21126e-12	20.3643	stable
BC023835	0.632962	4.83822	14.1018	1.64395e-13	3.26558e-12	20.3463	stable
2010005E20Rik	-0.7064	2.2353	-14.0973	1.65562e-13	3.28665e-12	20.3391	stable
2610024M03Rik	-0.659717	3.64166	-14.0858	1.6865e-13	3.34579e-12	20.32	stable
Creld2	-0.717277	5.7532	-14.0844	1.6902e-13	3.35099e-12	20.3178	stable
Rps6ka4	-0.665461	5.20468	-14.0756	1.7144e-13	3.39677e-12	20.3031	stable
Stard5	0.646176	5.24625	14.0685	1.73416e-13	3.43373e-12	20.2913	stable
Hdac4	-0.775684	3.83797	-14.0671	1.73796e-13	3.43878e-12	20.2891	stable
Aps-pending	-0.699529	2.23524	-14.0667	1.73894e-13	3.43878e-12	20.2885	stable
Ralb	-0.68331	5.99736	-14.0632	1.74887e-13	3.45602e-12	20.2827	stable
Nfkb1	0.728564	3.46594	14.0628	1.7499e-13	3.45602e-12	20.282	stable
Ppp1r9a	0.781506	2.19343	14.06	1.75778e-13	3.46936e-12	20.2774	stable
C230070D10Rik	0.715485	4.45486	14.0574	1.76524e-13	3.48187e-12	20.2731	stable
Mgat4b	1.00991	6.68596	14.0503	1.78557e-13	3.51971e-12	20.2613	stable
6430514E13Rik	0.648996	2.28619	14.0482	1.79163e-13	3.52941e-12	20.2578	stable
BC002163	-0.84087	6.45031	-14.047	1.79504e-13	3.53388e-12	20.2558	stable
1500001M20Rik	-0.815075	3.97753	-14.0327	1.8368e-13	3.61378e-12	20.2322	stable
2210419D22Rik	0.728758	6.67447	14.0267	1.85449e-13	3.64626e-12	20.2223	stable
Pdap1	-0.933534	5.59505	-14.0224	1.86739e-13	3.66928e-12	20.2152	stable
Chmp1b	0.758327	6.63178	14.0179	1.88107e-13	3.69382e-12	20.2076	stable
Fbxo33	-1.04328	5.61927	-14.0125	1.89749e-13	3.72369e-12	20.1987	stable
Rabep1	0.765689	3.76146	14.01	1.90499e-13	3.73404e-12	20.1946	stable
Amigo3	-0.753262	2.46068	-14.01	1.90518e-13	3.73404e-12	20.1945	stable
C430015M08Rik	0.846503	3.18258	14.0096	1.90645e-13	3.73414e-12	20.1938	stable
Rnase4	-0.76318	6.53047	-14.0076	1.91234e-13	3.74331e-12	20.1907	stable
1110001P04Rik	0.70479	5.46573	13.997	1.94529e-13	3.8054e-12	20.1731	stable
Mocs1	0.759842	6.06306	13.9913	1.96323e-13	3.83806e-12	20.1636	stable
Gipc1	-0.691126	4.80465	-13.9785	2.0045e-13	3.91627e-12	20.1422	stable
Ryk	-0.764861	3.57684	-13.9712	2.02808e-13	3.95982e-12	20.1302	stable
Cd86	0.698524	3.19793	13.9676	2.04002e-13	3.98061e-12	20.1241	stable
Rgs1	0.881359	5.37321	13.9662	2.0447e-13	3.98723e-12	20.1218	stable
Mapk1ip1l	0.81232	4.18092	13.9615	2.06027e-13	4.01506e-12	20.114	stable
9630025I21Rik	0.695155	3.21886	13.9608	2.06236e-13	4.0166e-12	20.1129	stable
Hpgd	0.741392	3.39062	13.9475	2.10738e-13	4.10168e-12	20.0907	stable
Dnclc1	-0.710609	5.16808	-13.9427	2.12352e-13	4.1305e-12	20.0828	stable
Ccdc91	0.64143	3.70704	13.9412	2.12881e-13	4.13818e-12	20.0803	stable
Hoxa1	-0.735405	2.03931	-13.9386	2.13768e-13	4.1528e-12	20.076	stable
1810035L17Rik	-0.877709	5.15319	-13.9381	2.13941e-13	4.15355e-12	20.0752	stable
D14Ertd668e	0.732748	3.45301	13.9376	2.14122e-13	4.15444e-12	20.0743	stable
Samd9l	0.642999	6.81692	13.9349	2.15071e-13	4.17024e-12	20.0697	stable
Txnl4a	-0.890173	5.8564	-13.9342	2.15315e-13	4.17236e-12	20.0686	stable
0710007G10Rik	0.745757	4.35675	13.9333	2.15607e-13	4.17538e-12	20.0672	stable
1200016E24Rik	1.28455	4.40493	13.9318	2.16152e-13	4.18332e-12	20.0646	stable
Ccdc88a	0.760218	3.79107	13.9309	2.1647e-13	4.18685e-12	20.0631	stable
Sympk	-1.05242	5.09633	-13.924	2.18887e-13	4.23094e-12	20.0516	stable
B430306N03Rik	0.756479	3.80431	13.9214	2.19807e-13	4.24607e-12	20.0473	stable
3110043O21Rik	0.913207	6.16287	13.9067	2.25121e-13	4.346e-12	20.0227	stable
LOC100044968	0.777711	4.53045	13.9006	2.27354e-13	4.38637e-12	20.0126	stable
Snx2	0.804807	4.97463	13.8994	2.27781e-13	4.39186e-12	20.0106	stable
D930042A21Rik	-0.703143	2.38031	-13.8873	2.32283e-13	4.47587e-12	19.9905	stable
Ganc	0.734832	2.52715	13.8854	2.33012e-13	4.48712e-12	19.9873	stable
Plxnd1	0.673553	7.09687	13.874	2.37375e-13	4.56828e-12	19.9682	stable
Plcl2	0.806447	5.68033	13.8734	2.37609e-13	4.56994e-12	19.9672	stable
Armc3	-0.786593	3.08156	-13.868	2.39709e-13	4.60746e-12	19.9581	stable
Ctnnbip1	-0.806404	4.95589	-13.8655	2.40663e-13	4.62268e-12	19.954	stable
Ppapdc1	-0.754958	4.36453	-13.8652	2.40801e-13	4.62268e-12	19.9534	stable
Pitpnc1	0.971467	3.21547	13.8609	2.4248e-13	4.65203e-12	19.9463	stable
LOC100047184	-0.665826	8.03559	-13.8596	2.42986e-13	4.65884e-12	19.9441	stable
3830612M24	0.718378	6.61259	13.8546	2.44957e-13	4.69372e-12	19.9358	stable
Loxl1	0.881061	2.45298	13.8475	2.4781e-13	4.74545e-12	19.9239	stable
Wsb2	0.640275	8.67637	13.8455	2.48611e-13	4.75782e-12	19.9206	stable
Cuta	-0.747366	7.1707	-13.845	2.48829e-13	4.75905e-12	19.9197	stable
Nomo1	-0.82682	6.06966	-13.839	2.51267e-13	4.8027e-12	19.9096	stable
Ctgf	0.7103	3.38266	13.8384	2.51516e-13	4.80449e-12	19.9086	stable
Blnk	1.03723	5.61026	13.8264	2.56472e-13	4.89612e-12	19.8885	stable
Sh3gl1	-0.697917	5.00305	-13.8172	2.60324e-13	4.96659e-12	19.8732	stable
Bmi1	0.671487	3.40524	13.8151	2.61241e-13	4.981e-12	19.8696	stable
E130302P19Rik	0.63532	2.27041	13.8093	2.63714e-13	5.02506e-12	19.8599	stable
Zkscan5	0.6596	4.5465	13.8069	2.64732e-13	5.04135e-12	19.8559	stable
Galnt11	0.694567	5.15652	13.8061	2.65062e-13	5.04452e-12	19.8546	stable
Nrp	0.713082	5.05442	13.8048	2.65633e-13	5.05226e-12	19.8524	stable
Rbm4	-0.725029	5.22567	-13.8041	2.65961e-13	5.05538e-12	19.8511	stable
Eif2ak3	-0.772443	2.43074	-13.7989	2.68226e-13	5.09531e-12	19.8424	stable
Gmpr	-0.838164	4.24493	-13.7982	2.68507e-13	5.09751e-12	19.8413	stable
Hddc2	-0.792698	3.13785	-13.7933	2.70652e-13	5.13506e-12	19.8331	stable
Stk25	0.804065	4.09371	13.7919	2.71277e-13	5.14376e-12	19.8308	stable
Atp6v1c1	0.643376	7.71003	13.7906	2.71849e-13	5.15145e-12	19.8286	stable
Ppp1r8	-0.649741	4.82097	-13.7869	2.735e-13	5.17955e-12	19.8224	stable
Gbp3	0.793163	3.60495	13.7707	2.80816e-13	5.31485e-12	19.7952	stable
Cyb5b	-0.625024	7.47256	-13.7677	2.82211e-13	5.33797e-12	19.7901	stable
Ppp5c	-0.80447	4.44917	-13.7609	2.85363e-13	5.3943e-12	19.7786	stable
F730003H07Rik	0.845534	3.42196	13.7601	2.85729e-13	5.39789e-12	19.7773	stable
Cog4	0.636239	4.04449	13.7556	2.87836e-13	5.43402e-12	19.7698	stable
Pnpla1	0.736385	3.15215	13.7553	2.87993e-13	5.43402e-12	19.7692	stable
Cd1d1	-0.809765	3.9683	-13.7517	2.89682e-13	5.46254e-12	19.7632	stable
scl0001562.1_73	0.82226	2.52309	13.742	2.94311e-13	5.54645e-12	19.7469	stable
Akap2	0.631467	3.64076	13.7303	2.99998e-13	5.65017e-12	19.7272	stable
A130014O09Rik	0.794308	3.59575	13.7268	3.01752e-13	5.67975e-12	19.7212	stable
Eif4g2	0.805457	5.26479	13.7262	3.02035e-13	5.6816e-12	19.7202	stable
Dctd	-0.738232	3.48127	-13.7204	3.04885e-13	5.73172e-12	19.7105	stable
Polr2l	-0.627935	8.06865	-13.7164	3.06924e-13	5.76655e-12	19.7037	stable
Mthfs	1.03477	5.49266	13.7086	3.10837e-13	5.83651e-12	19.6906	stable
Cbx6	-0.797046	2.45849	-13.6927	3.19061e-13	5.9873e-12	19.6638	stable
Rdh11	-0.658835	6.2563	-13.6845	3.23366e-13	6.06439e-12	19.65	stable
Tpm1	0.755712	5.10495	13.6833	3.2402e-13	6.07297e-12	19.6479	stable
1100001G20Rik	-0.684141	2.22387	-13.6808	3.25354e-13	6.09426e-12	19.6436	stable
2610024G14Rik	-0.642266	5.05274	-13.6748	3.28574e-13	6.15085e-12	19.6335	stable
EG433643	0.742279	3.19642	13.6654	3.33711e-13	6.24323e-12	19.6175	stable
Agrn	0.743195	4.4881	13.6648	3.33999e-13	6.24482e-12	19.6167	stable
D030017L14Rik	0.711076	3.50605	13.6582	3.37639e-13	6.30907e-12	19.6055	stable
Rps19	-0.745079	2.40141	-13.6574	3.38077e-13	6.31342e-12	19.6042	stable
P2rx1	-0.708204	2.53652	-13.6505	3.41943e-13	6.38176e-12	19.5925	stable
Creg1	0.750762	8.23142	13.6476	3.43593e-13	6.40868e-12	19.5875	stable
Itfg2	-0.770329	3.64851	-13.644	3.45643e-13	6.44302e-12	19.5814	stable
5730528L13Rik	-0.983821	2.92833	-13.6333	3.51738e-13	6.55268e-12	19.5634	stable
Arhgap19	0.727103	4.04302	13.6323	3.52353e-13	6.56019e-12	19.5616	stable
Rfx2	-0.911137	2.20669	-13.6202	3.59428e-13	6.68787e-12	19.5411	stable
Dok3	-0.828171	6.302	-13.6098	3.65614e-13	6.79888e-12	19.5236	stable
Lrrc57	0.734084	4.74583	13.607	3.67318e-13	6.82646e-12	19.5188	stable
Plscr1	0.827151	5.20032	13.6026	3.70002e-13	6.87219e-12	19.5113	stable
Ggnbp1	0.804055	2.54384	13.5988	3.72304e-13	6.90986e-12	19.5049	stable
LOC100044779	-1.10624	5.43676	-13.5986	3.72478e-13	6.90986e-12	19.5044	stable
EG328314	0.689336	3.03257	13.5954	3.74411e-13	6.94155e-12	19.4991	stable
Prps1	-0.730451	4.80412	-13.5927	3.76081e-13	6.96833e-12	19.4945	stable
BC017612	-0.728842	3.23725	-13.5867	3.79854e-13	7.03403e-12	19.4842	stable
Atp10a	-0.717316	2.74389	-13.5835	3.81847e-13	7.06668e-12	19.4788	stable
Pgs1	-0.662307	7.34549	-13.5817	3.82953e-13	7.08291e-12	19.4759	stable
Snx13	0.787567	3.56038	13.5806	3.83666e-13	7.0915e-12	19.4739	stable
9430065L19Rik	-0.98653	6.23896	-13.5803	3.83877e-13	7.0915e-12	19.4734	stable
scl0004085.1_27	0.675054	2.4504	13.5799	3.84147e-13	7.09224e-12	19.4727	stable
Rnu6	-0.832613	6.76375	-13.5737	3.88063e-13	7.16027e-12	19.4622	stable
5730596K20Rik	-0.631654	3.92131	-13.5725	3.88813e-13	7.16981e-12	19.4602	stable
Aup1	0.98248	5.8005	13.5721	3.89126e-13	7.1713e-12	19.4594	stable
9330177P20Rik	0.68505	3.71352	13.5708	3.89905e-13	7.18137e-12	19.4573	stable
Gmppa	0.910872	4.33591	13.5679	3.91806e-13	7.21209e-12	19.4523	stable
Mif	-0.7623	7.43022	-13.561	3.96311e-13	7.29065e-12	19.4406	stable
Tmem150	0.891996	3.1412	13.5563	3.99405e-13	7.34321e-12	19.4326	stable
Bzw2	-0.868128	5.6883	-13.551	4.02895e-13	7.40296e-12	19.4236	stable
Tyk2	0.97531	3.01958	13.541	4.09645e-13	7.52251e-12	19.4065	stable
Ccrn4l	-0.79253	3.4425	-13.5251	4.20536e-13	7.7179e-12	19.3795	stable
Tpp1	0.790833	6.14077	13.5237	4.2152e-13	7.73137e-12	19.3771	stable
Mybl2	-0.67763	2.02029	-13.5221	4.22607e-13	7.74671e-12	19.3744	stable
Aig1	0.681918	3.66556	13.5205	4.23738e-13	7.76284e-12	19.3717	stable
Adap2	1.61147	4.7454	13.5064	4.3379e-13	7.94226e-12	19.3476	stable
1700003F12Rik	0.715461	2.84862	13.4934	4.43243e-13	8.11053e-12	19.3254	stable
Mmp12	0.719031	6.46159	13.4916	4.44561e-13	8.12982e-12	19.3223	stable
Zfp251	0.604564	4.45263	13.4859	4.48784e-13	8.198e-12	19.3126	stable
1810055E12Rik	0.833073	3.31949	13.4858	4.4882e-13	8.198e-12	19.3125	stable
Obrgrp	0.616677	7.50068	13.4796	4.5351e-13	8.27877e-12	19.3018	stable
scl0002064.1_2	0.701331	3.5085	13.4768	4.55619e-13	8.31236e-12	19.297	stable
Rps6ka1	-0.716085	4.42308	-13.4664	4.63528e-13	8.45166e-12	19.2793	stable
5730593F17Rik	-0.877797	3.10949	-13.4639	4.65439e-13	8.48148e-12	19.2751	stable
Ddost	-0.71147	5.79029	-13.4629	4.66197e-13	8.49028e-12	19.2734	stable
Utp6	0.746099	4.92226	13.4537	4.73374e-13	8.60864e-12	19.2577	stable
AU020206	0.77011	3.7577	13.4536	4.73462e-13	8.60864e-12	19.2575	stable
9830134K01Rik	0.686778	4.20102	13.4535	4.73532e-13	8.60864e-12	19.2573	stable
Phf5a	-0.691522	7.59396	-13.452	4.7476e-13	8.62588e-12	19.2547	stable
Snrpd2	-0.832856	7.86849	-13.4509	4.75606e-13	8.63616e-12	19.2528	stable
Med12	0.670562	5.18183	13.4504	4.76005e-13	8.63832e-12	19.252	stable
Rpia	-0.80835	5.07765	-13.4484	4.77622e-13	8.66257e-12	19.2485	stable
Fxc1	-0.799246	6.45345	-13.4463	4.79276e-13	8.68747e-12	19.2449	stable
Oasl2	0.810366	2.98118	13.4452	4.80177e-13	8.69869e-12	19.243	stable
P2ry1	0.862549	5.11738	13.4412	4.83341e-13	8.75089e-12	19.2362	stable
Eng	-0.759857	4.1188	-13.4402	4.84143e-13	8.76026e-12	19.2345	stable
Ch25h	-0.711038	2.30901	-13.4363	4.8731e-13	8.8124e-12	19.2278	stable
Cdk4	-0.752188	4.13423	-13.4355	4.87937e-13	8.81858e-12	19.2265	stable
Ptchd1	0.840336	2.49439	13.4327	4.90198e-13	8.85425e-12	19.2217	stable
Rufy4	0.642079	2.59464	13.4322	4.90676e-13	8.85771e-12	19.2207	stable
6330403M23Rik	0.761646	4.02897	13.4308	4.91799e-13	8.87279e-12	19.2184	stable
1500032D16Rik	-0.76851	8.01562	-13.4295	4.92828e-13	8.88616e-12	19.2162	stable
Gpbp1l1	0.741867	2.33718	13.4218	4.99214e-13	8.99606e-12	19.203	stable
Tceal1	0.748838	2.64033	13.4175	5.02833e-13	9.05598e-12	19.1955	stable
Commd1	-0.876521	4.57543	-13.4161	5.04008e-13	9.07185e-12	19.1931	stable
Ranbp10	0.615282	6.57379	13.4126	5.06959e-13	9.11965e-12	19.1871	stable
Tlr13	0.661446	7.53928	13.4113	5.07992e-13	9.13291e-12	19.185	stable
LOC100045999	-0.713454	8.59878	-13.4105	5.08716e-13	9.14061e-12	19.1836	stable
4733401O04Rik	-0.844373	3.05112	-13.4037	5.14505e-13	9.23924e-12	19.1719	stable
Ccl4	-0.831827	8.78519	-13.4001	5.17571e-13	9.2889e-12	19.1658	stable
Ncapd3	-0.723283	4.3463	-13.3911	5.25437e-13	9.42458e-12	19.1503	stable
Gpr97	-0.712325	2.32965	-13.3893	5.27005e-13	9.44722e-12	19.1472	stable
Hey1	0.718416	2.96413	13.379	5.36099e-13	9.60467e-12	19.1296	stable
Th1l	-0.658719	3.94148	-13.3729	5.41616e-13	9.69788e-12	19.119	stable
Cse1l	-0.646441	4.51293	-13.3718	5.42632e-13	9.71044e-12	19.1171	stable
Mrps26	-0.802473	5.14809	-13.3704	5.43905e-13	9.72759e-12	19.1147	stable
B230387C07Rik	1.14257	3.86397	13.365	5.48798e-13	9.80941e-12	19.1055	stable
LOC100047167	-0.714479	4.22903	-13.3578	5.55424e-13	9.9221e-12	19.0931	stable
Tuba3a	-0.800255	2.81575	-13.3566	5.56578e-13	9.93697e-12	19.091	stable
Ppil1	-0.67579	4.77867	-13.3503	5.62426e-13	1.00356e-11	19.0802	stable
Dap3	-0.660318	7.31726	-13.3478	5.64788e-13	1.0068e-11	19.0759	stable
LOC100044298	0.841827	6.09608	13.3477	5.64895e-13	1.0068e-11	19.0757	stable
Igl-V1	-0.579977	1.89961	-13.3424	5.69899e-13	1.01513e-11	19.0667	stable
Fkbp9	0.733388	4.58828	13.3393	5.72925e-13	1.01993e-11	19.0612	stable
F730047E07Rik	-0.794583	2.73356	-13.3379	5.74234e-13	1.02167e-11	19.0589	stable
C330008K14Rik	-0.707066	3.46944	-13.3371	5.75013e-13	1.02247e-11	19.0575	stable
Gpatch2	0.758703	4.11031	13.3355	5.76606e-13	1.02471e-11	19.0546	stable
Oxct1	0.631544	8.1253	13.3293	5.82541e-13	1.03466e-11	19.0441	stable
Mgmt	-0.684892	4.95589	-13.3286	5.83292e-13	1.0354e-11	19.0427	stable
2310061C15Rik	-0.982555	2.91487	-13.3282	5.83641e-13	1.03543e-11	19.0421	stable
Zer1	0.813333	5.50251	13.3273	5.84516e-13	1.03638e-11	19.0406	stable
Tsc22d4	-0.726056	4.95313	-13.3218	5.89955e-13	1.04543e-11	19.0311	stable
Ift88	0.623621	3.08591	13.3211	5.90596e-13	1.04596e-11	19.0299	stable
E130216C05Rik	0.791178	3.56214	13.3085	6.03242e-13	1.06775e-11	19.0081	stable
Alas1	0.825896	8.27472	13.3081	6.03631e-13	1.06782e-11	19.0075	stable
2400009B08Rik	-0.827481	3.55101	-13.3008	6.1107e-13	1.08036e-11	18.9949	stable
Kctd21	0.711207	2.06909	13.2971	6.14907e-13	1.08652e-11	18.9884	stable
Rdh14	0.730854	4.95668	13.2957	6.16348e-13	1.08845e-11	18.986	stable
Tm7sf2	-0.760685	2.77911	-13.2924	6.19686e-13	1.09372e-11	18.9804	stable
Treml4	-0.787847	2.36739	-13.2913	6.20888e-13	1.09521e-11	18.9785	stable
Map4k2	-0.794529	4.0494	-13.2856	6.26831e-13	1.10506e-11	18.9686	stable
E230029F23Rik	-0.581086	7.04424	-13.285	6.27457e-13	1.10553e-11	18.9676	stable
Ccdc101	-0.918699	4.28502	-13.2843	6.28176e-13	1.10617e-11	18.9664	stable
Tctex1d2	0.732857	6.41375	13.2789	6.33896e-13	1.11501e-11	18.9571	stable
Fcgr3	0.732414	8.41604	13.2789	6.33919e-13	1.11501e-11	18.9571	stable
5530400K22Rik	0.763085	4.15851	13.2775	6.35447e-13	1.11706e-11	18.9546	stable
2310008M10Rik	-0.675786	8.02255	-13.2737	6.39501e-13	1.12355e-11	18.948	stable
LOC216443	-0.764344	5.09576	-13.2728	6.40492e-13	1.12465e-11	18.9465	stable
Rpo2tc1	-0.595536	3.04313	-13.2722	6.41066e-13	1.12502e-11	18.9455	stable
Gns	0.655581	8.54034	13.2657	6.48184e-13	1.13686e-11	18.9342	stable
5830411I20	-0.831269	6.50923	-13.2616	6.52654e-13	1.14405e-11	18.9271	stable
Hist2h2be	0.713449	3.73822	13.2461	6.69857e-13	1.17354e-11	18.9003	stable
Med21	-0.745343	4.60597	-13.2426	6.73846e-13	1.17986e-11	18.8942	stable
LOC100045430	-0.694173	4.44442	-13.232	6.85975e-13	1.20042e-11	18.8758	stable
4833421E05Rik	0.614252	5.2513	13.2289	6.89561e-13	1.20601e-11	18.8705	stable
Sgcb	0.650653	4.66203	13.2264	6.92397e-13	1.21028e-11	18.8662	stable
Pcp4l1	1.00148	3.8414	13.2253	6.93691e-13	1.21186e-11	18.8643	stable
Fam110c	0.697584	2.21387	13.2222	6.97318e-13	1.21751e-11	18.859	stable
Taok1	0.722427	5.62687	13.213	7.08296e-13	1.23597e-11	18.8429	stable
Bola2	-0.709267	6.2591	-13.2101	7.11728e-13	1.24126e-11	18.8379	stable
Polr3h	-0.721247	4.30737	-13.2044	7.18576e-13	1.2525e-11	18.828	stable
Nsun5	-0.708337	3.77097	-13.1922	7.33486e-13	1.27776e-11	18.8069	stable
Nup107	-0.781489	3.65902	-13.1905	7.35564e-13	1.28066e-11	18.804	stable
Rn18s	-1.22786	7.87165	-13.1853	7.4206e-13	1.29124e-11	18.7949	stable
BC030867	-0.656518	2.62883	-13.1832	7.44801e-13	1.29528e-11	18.7912	stable
Ncdn	-0.701657	5.09591	-13.1813	7.47083e-13	1.29852e-11	18.788	stable
Slc7a6	-0.697525	2.6511	-13.1804	7.48295e-13	1.29989e-11	18.7863	stable
Slc19a1	-0.654744	4.30359	-13.1758	7.54103e-13	1.30925e-11	18.7784	stable
Slc39a6	-0.738196	7.0147	-13.1685	7.63468e-13	1.32476e-11	18.7657	stable
Echs1	0.631905	3.34094	13.1654	7.67518e-13	1.33104e-11	18.7602	stable
Hist1h4c	-0.722355	2.12085	-13.1606	7.73768e-13	1.34113e-11	18.7519	stable
OTTMUSG00000000421	0.685752	2.33705	13.1579	7.77238e-13	1.34638e-11	18.7473	stable
Flt1	-0.716059	2.07465	-13.1573	7.7805e-13	1.34703e-11	18.7462	stable
Tesk1	-1.04526	5.80169	-13.1542	7.82194e-13	1.35345e-11	18.7407	stable
G630019A19Rik	0.712724	2.42145	13.1392	8.02192e-13	1.38727e-11	18.7148	stable
Pcmtd2	0.802992	2.35235	13.1386	8.03003e-13	1.3879e-11	18.7137	stable
Dnase1l1	0.808844	5.40719	13.1355	8.07209e-13	1.39439e-11	18.7083	stable
Mrpl38	-0.821451	3.31558	-13.1315	8.12723e-13	1.40313e-11	18.7013	stable
6230416J20Rik	-0.777525	3.77011	-13.1297	8.15303e-13	1.4068e-11	18.6981	stable
Lgsn	0.961664	3.19037	13.1247	8.22165e-13	1.41784e-11	18.6894	stable
Sec61g	-0.797684	8.03978	-13.117	8.32935e-13	1.43561e-11	18.676	stable
LOC665250	-0.809475	8.41862	-13.1019	8.54554e-13	1.47206e-11	18.6497	stable
Tbc1d23	0.812448	4.76342	13.0992	8.58411e-13	1.47787e-11	18.645	stable
Asna1	-0.684055	7.58348	-13.0963	8.62699e-13	1.48443e-11	18.6399	stable
2310007F21Rik	0.820394	3.32247	13.0959	8.63284e-13	1.48461e-11	18.6392	stable
Pdk1	-0.840105	4.80747	-13.0793	8.87958e-13	1.52619e-11	18.6102	stable
D030029J20Rik	0.589579	3.17531	13.0788	8.88692e-13	1.5266e-11	18.6093	stable
Sf3a1	-0.675801	6.16203	-13.0725	8.98347e-13	1.54233e-11	18.5982	stable
2310033F14Rik	-0.617875	5.25468	-13.0672	9.06479e-13	1.55495e-11	18.589	stable
LOC100047226	0.658426	2.19219	13.067	9.06706e-13	1.55495e-11	18.5887	stable
Vti1a	-0.637427	2.62134	-13.0643	9.10834e-13	1.56116e-11	18.584	stable
Smn1	-0.746644	6.74509	-13.0629	9.13041e-13	1.56408e-11	18.5815	stable
Itgb1bp1	-0.71219	2.9211	-13.0591	9.19037e-13	1.57347e-11	18.5748	stable
Prpf19	-0.615664	7.09587	-13.0576	9.21356e-13	1.57657e-11	18.5722	stable
Acsf3	-0.809114	3.26826	-13.0502	9.3299e-13	1.59559e-11	18.5593	stable
2510022D24Rik	-0.741449	3.79544	-13.0489	9.35115e-13	1.59834e-11	18.5569	stable
Syngr2	0.956109	5.54348	13.0393	9.50458e-13	1.62367e-11	18.5402	stable
LOC100044159	0.632382	4.49634	13.039	9.51e-13	1.6237e-11	18.5396	stable
Ahdc1	-0.57728	2.98794	-13.0337	9.59496e-13	1.6373e-11	18.5304	stable
Ap2s1	-0.647275	8.35498	-13.0331	9.60545e-13	1.63818e-11	18.5293	stable
Dazap1	-0.703628	7.25421	-13.0273	9.70006e-13	1.6534e-11	18.5192	stable
Cxcr3	-0.967839	3.08572	-13.026	9.72153e-13	1.65578e-11	18.517	stable
Nuak2	0.634277	6.04866	13.0258	9.72471e-13	1.65578e-11	18.5166	stable
Obfc2a	0.772992	4.03711	13.0225	9.78014e-13	1.66429e-11	18.5108	stable
Nfe2l1	-0.640647	7.50102	-13.0197	9.8275e-13	1.67143e-11	18.5058	stable
Kbtbd2	0.652863	5.84494	13.0044	1.00871e-12	1.71464e-11	18.479	stable
Acy1	-0.787878	2.93578	-13	1.01636e-12	1.72591e-11	18.4712	stable
Sdc4	-0.78326	5.22	-12.9999	1.01646e-12	1.72591e-11	18.4711	stable
Mrpl40	-0.684489	6.0279	-12.9987	1.01858e-12	1.72856e-11	18.4689	stable
1700027N10Rik	0.603795	4.7177	12.9944	1.026e-12	1.74002e-11	18.4615	stable
Drg2	-0.643502	5.14162	-12.9942	1.02646e-12	1.74002e-11	18.461	stable
1500012F01Rik	0.939225	5.84696	12.991	1.03202e-12	1.74848e-11	18.4555	stable
Tufm	-0.621471	7.38242	-12.9905	1.03285e-12	1.74893e-11	18.4546	stable
Ugt1a7c	0.994698	4.13872	12.9842	1.04402e-12	1.76688e-11	18.4436	stable
Hnrnpab	-0.674226	8.85677	-12.9753	1.06002e-12	1.79297e-11	18.4279	stable
Pogk	0.628753	3.97138	12.9727	1.06472e-12	1.79993e-11	18.4233	stable
Ubap1	0.608941	5.78908	12.9593	1.08939e-12	1.84064e-11	18.3998	stable
Arih2	0.633256	5.75374	12.957	1.0937e-12	1.8469e-11	18.3957	stable
Zfp263	0.797423	5.75822	12.955	1.09745e-12	1.85212e-11	18.3922	stable
Arhgap26	-0.653135	2.36334	-12.9547	1.09799e-12	1.85212e-11	18.3917	stable
Mmp2	0.712523	2.5021	12.951	1.10499e-12	1.86291e-11	18.3851	stable
Sae1	-0.708903	7.94645	-12.9487	1.10933e-12	1.86921e-11	18.3811	stable
Hebp1	0.851425	6.70079	12.9442	1.11797e-12	1.88274e-11	18.3731	stable
2600005C20Rik	-0.693398	3.98643	-12.9424	1.12131e-12	1.88734e-11	18.37	stable
Etfdh	0.645873	4.96263	12.9327	1.14025e-12	1.91817e-11	18.3528	stable
Slc35e4	-0.727536	3.21746	-12.9147	1.17583e-12	1.97694e-11	18.3212	stable
LOC100045780	0.609862	3.74504	12.9112	1.18292e-12	1.98778e-11	18.315	stable
Rhoj	0.650733	3.50749	12.9092	1.18702e-12	1.99359e-11	18.3114	stable
Atpi	0.633748	3.08036	12.9083	1.18875e-12	1.9954e-11	18.3099	stable
Socs2	0.789492	2.79036	12.9077	1.19012e-12	1.99662e-11	18.3087	stable
LOC386078	0.650759	5.28741	12.9061	1.1934e-12	2.00103e-11	18.3059	stable
Glb1l	0.594877	2.60682	12.8971	1.21187e-12	2.0309e-11	18.2901	stable
Gnb2	-0.820884	7.7154	-12.8922	1.22213e-12	2.04698e-11	18.2814	stable
Txnl4	-0.806226	5.53054	-12.8911	1.22448e-12	2.0498e-11	18.2795	stable
C79407	-0.671858	2.93602	-12.8898	1.22727e-12	2.05337e-11	18.2771	stable
Kdelr2	-0.717693	5.41992	-12.8821	1.24342e-12	2.07926e-11	18.2637	stable
LOC100044557	0.667479	6.98117	12.8656	1.27939e-12	2.13825e-11	18.2343	stable
Ube2s	-0.801564	2.9121	-12.8605	1.29056e-12	2.15575e-11	18.2254	stable
LOC100046081	-0.628388	4.86477	-12.856	1.30065e-12	2.17142e-11	18.2173	stable
Oaz2	0.614054	4.32992	12.8556	1.30138e-12	2.17147e-11	18.2168	stable
LOC676420	0.837794	3.94679	12.8543	1.30428e-12	2.17513e-11	18.2145	stable
1190017O12Rik	-0.585981	6.40792	-12.8525	1.30833e-12	2.18071e-11	18.2113	stable
BC028528	0.934331	6.55881	12.8442	1.32731e-12	2.21115e-11	18.1965	stable
Ilvbl	1.0036	3.14348	12.843	1.32999e-12	2.21442e-11	18.1944	stable
Tesc	-0.651741	2.24946	-12.839	1.33927e-12	2.22867e-11	18.1872	stable
LOC100046918	0.716157	6.06057	12.8361	1.34592e-12	2.23853e-11	18.1821	stable
P2ry13	-0.587412	3.8609	-12.8342	1.35029e-12	2.24459e-11	18.1788	stable
LOC280487	0.718126	2.74155	12.8326	1.35407e-12	2.24966e-11	18.1759	stable
Tm4sf5	0.607562	2.14051	12.8277	1.36555e-12	2.26752e-11	18.1672	stable
5730405I09Rik	0.634421	4.59372	12.826	1.36944e-12	2.27276e-11	18.1643	stable
Dscr2	-0.81515	4.72716	-12.825	1.3719e-12	2.27442e-11	18.1625	stable
Irf9	0.654308	5.39081	12.825	1.37191e-12	2.27442e-11	18.1624	stable
mtDNA_ND5	0.950197	7.50354	12.8212	1.38092e-12	2.28811e-11	18.1557	stable
Lcp1	0.599746	7.28554	12.817	1.39103e-12	2.30344e-11	18.1482	stable
LOC100045864	0.656484	9.52095	12.8167	1.39166e-12	2.30344e-11	18.1477	stable
Nubp2	-0.624315	5.95826	-12.806	1.41762e-12	2.34514e-11	18.1287	stable
Arrb2	-0.79804	6.9273	-12.8003	1.4315e-12	2.36685e-11	18.1187	stable
Vamp4	0.746164	6.5368	12.7993	1.43413e-12	2.36992e-11	18.1168	stable
Apol7c	0.803954	2.63863	12.796	1.44215e-12	2.3819e-11	18.1111	stable
2010203O07Rik	-0.772286	2.75762	-12.7851	1.46976e-12	2.4262e-11	18.0915	stable
Sac3d1	-0.845916	3.52935	-12.7834	1.474e-12	2.43191e-11	18.0886	stable
Surf1	0.620643	4.24866	12.7807	1.48075e-12	2.44173e-11	18.0839	stable
scl0004040.1_123	0.739482	2.93722	12.7797	1.48333e-12	2.44468e-11	18.0821	stable
2510009E07Rik	0.709614	5.17364	12.7791	1.48503e-12	2.44617e-11	18.0809	stable
Col20a1	0.717295	2.25375	12.7693	1.5104e-12	2.48664e-11	18.0635	stable
Lonp1	-0.668575	4.58155	-12.7646	1.5225e-12	2.50523e-11	18.0553	stable
6430402L23Rik	-0.938003	6.49847	-12.7627	1.52774e-12	2.5125e-11	18.0517	stable
Rcan1	0.786414	2.55126	12.7596	1.5358e-12	2.52442e-11	18.0463	stable
Serhl	0.61952	3.62319	12.7573	1.54209e-12	2.53341e-11	18.0421	stable
Sh2b2	0.781458	3.60925	12.7562	1.54497e-12	2.53679e-11	18.0402	stable
Samhd1	0.748456	6.2498	12.75	1.56152e-12	2.56236e-11	18.0292	stable
Csnk1d	-0.921926	5.61864	-12.7498	1.5622e-12	2.56236e-11	18.0288	stable
Mnd1	-0.909437	2.2688	-12.745	1.57508e-12	2.58211e-11	18.0203	stable
Lrp11	0.665003	4.34955	12.7439	1.57823e-12	2.58591e-11	18.0183	stable
Elovl1	0.810926	6.61634	12.7428	1.58128e-12	2.58953e-11	18.0163	stable
Bin1	-0.750476	3.03259	-12.74	1.58895e-12	2.60071e-11	18.0113	stable
Hist1h2bh	0.984488	6.79379	12.7394	1.59043e-12	2.60174e-11	18.0103	stable
Il1r2	-0.646103	1.98236	-12.7389	1.59199e-12	2.60292e-11	18.0093	stable
Abca7	-0.811011	5.18329	-12.7378	1.59489e-12	2.60628e-11	18.0075	stable
Rhoq	-0.626431	5.90345	-12.7307	1.61471e-12	2.63728e-11	17.9947	stable
Sssca1	-0.70875	5.17941	-12.7244	1.63225e-12	2.66451e-11	17.9836	stable
LOC100047827	-0.796679	7.53843	-12.7237	1.63427e-12	2.6664e-11	17.9823	stable
1700121M19Rik	-0.606847	2.54491	-12.7225	1.63767e-12	2.67053e-11	17.9802	stable
Afg3l2	-0.675549	4.0264	-12.7097	1.6744e-12	2.72899e-11	17.9574	stable
9530064J02	0.644746	5.04094	12.7081	1.67912e-12	2.73523e-11	17.9545	stable
BC004701	-0.719184	2.08217	-12.6971	1.71144e-12	2.78642e-11	17.9349	stable
Usp18	0.891981	3.50494	12.6968	1.71248e-12	2.78663e-11	17.9342	stable
Zfp764	0.709176	2.38902	12.691	1.72986e-12	2.81344e-11	17.9238	stable
Nek9	0.721257	4.00375	12.6842	1.75025e-12	2.8451e-11	17.9118	stable
Ssr1	-0.76453	4.26262	-12.6787	1.76727e-12	2.87126e-11	17.9018	stable
Tuba6	-0.730924	7.15785	-12.6686	1.79853e-12	2.92051e-11	17.8838	stable
Cops4	-0.641735	7.11052	-12.6668	1.80411e-12	2.92802e-11	17.8806	stable
Cbfa2t3h	-0.83658	3.10117	-12.6625	1.81755e-12	2.94828e-11	17.873	stable
Basp1	-0.824487	2.9441	-12.6419	1.88383e-12	3.05421e-11	17.8361	stable
Rims3	0.880816	2.75833	12.6385	1.89507e-12	3.07081e-11	17.83	stable
Isyna1	-0.690449	4.81092	-12.638	1.89679e-12	3.07199e-11	17.829	stable
2310004I03Rik	0.984355	5.257	12.6334	1.91192e-12	3.09487e-11	17.8209	stable
Mrpl12	-0.747578	7.02829	-12.6323	1.91579e-12	3.0995e-11	17.8188	stable
Ncapd2	-0.758928	2.786	-12.6286	1.92826e-12	3.11805e-11	17.8121	stable
Pgam1	-0.936335	3.67919	-12.6163	1.96985e-12	3.18363e-11	17.7901	stable
2410018G20Rik	-0.652046	4.43097	-12.6134	1.98005e-12	3.19844e-11	17.7848	stable
C920007D24Rik	-0.614228	3.16358	-12.6076	2.00001e-12	3.22898e-11	17.7745	stable
Olfml3	0.869211	2.43242	12.6067	2.00326e-12	3.23254e-11	17.7728	stable
1500032L24Rik	-0.734666	8.0691	-12.605	2.00925e-12	3.24052e-11	17.7698	stable
Hist1h2bn	0.959608	5.81798	12.5965	2.03934e-12	3.28734e-11	17.7545	stable
Commd4	-0.61992	6.71408	-12.5888	2.06682e-12	3.32988e-11	17.7407	stable
Ltb	-0.704749	2.44838	-12.5868	2.07418e-12	3.34001e-11	17.737	stable
Iap	0.912007	6.01977	12.5857	2.07786e-12	3.34419e-11	17.7352	stable
2310010B21Rik	-0.654098	4.3282	-12.5843	2.08294e-12	3.35062e-11	17.7327	stable
LOC381947	-0.691632	5.31281	-12.5745	2.11923e-12	3.40721e-11	17.7149	stable
Znhit3	-0.686678	2.94696	-12.5735	2.12292e-12	3.41137e-11	17.7131	stable
LOC677008	-0.615699	2.16435	-12.5723	2.12726e-12	3.41656e-11	17.711	stable
Maea	0.88232	4.87498	12.5683	2.14233e-12	3.43898e-11	17.7038	stable
Ect2	-0.643861	2.07275	-12.5625	2.16399e-12	3.47195e-11	17.6934	stable
Tmem23	0.748536	4.6242	12.5618	2.16677e-12	3.47461e-11	17.6921	stable
1200003C05Rik	0.740626	5.43674	12.5591	2.17707e-12	3.4893e-11	17.6872	stable
Stx5a	0.655293	4.05918	12.558	2.1811e-12	3.49394e-11	17.6853	stable
Serping1	0.670937	1.99217	12.5556	2.19021e-12	3.50672e-11	17.681	stable
Chchd7	-0.796414	5.05986	-12.5521	2.20372e-12	3.52652e-11	17.6747	stable
Dapp1	-0.688673	3.45152	-12.5472	2.22287e-12	3.55533e-11	17.6658	stable
2610041B18Rik	-0.599409	2.78592	-12.5449	2.2318e-12	3.56614e-11	17.6617	stable
6430590I03Rik	0.614827	2.94047	12.5449	2.23194e-12	3.56614e-11	17.6616	stable
4930465J06Rik	0.70854	2.49732	12.5407	2.2483e-12	3.59042e-11	17.6541	stable
Tomm34	0.634841	4.88593	12.5358	2.2678e-12	3.61969e-11	17.6452	stable
Ifnar2	0.629468	2.47634	12.5346	2.27257e-12	3.62542e-11	17.643	stable
Igfbp4	-0.638092	6.53511	-12.5213	2.32613e-12	3.70896e-11	17.619	stable
Bard1	-0.606165	1.90515	-12.5187	2.33658e-12	3.7237e-11	17.6144	stable
Cysltr1	-0.70786	3.93771	-12.5153	2.35077e-12	3.74438e-11	17.6082	stable
Klc1	-0.880936	2.88239	-12.5117	2.36537e-12	3.76568e-11	17.6018	stable
5730494N06Rik	0.711393	5.51505	12.511	2.36859e-12	3.76886e-11	17.6004	stable
Zfp12	0.590266	4.86087	12.5032	2.40098e-12	3.81844e-11	17.5865	stable
Mxd3	-0.683478	1.92611	-12.5015	2.40805e-12	3.82687e-11	17.5834	stable
D16Ertd472e	-0.625831	2.56867	-12.5014	2.40876e-12	3.82687e-11	17.5831	stable
Rnf144a	-0.631158	1.87904	-12.499	2.41897e-12	3.84112e-11	17.5788	stable
Tmco3	0.595012	2.84926	12.4969	2.42792e-12	3.85334e-11	17.575	stable
Mphosph6	-0.723141	4.86804	-12.4925	2.4468e-12	3.88131e-11	17.567	stable
Qrsl1	-0.579152	5.4364	-12.4906	2.45464e-12	3.89175e-11	17.5637	stable
Limk1	-0.609439	4.94391	-12.4884	2.4645e-12	3.90538e-11	17.5596	stable
Cenpo	0.915036	2.86427	12.4833	2.48663e-12	3.93841e-11	17.5504	stable
4732496O08Rik	0.715967	3.55803	12.4695	2.54755e-12	4.03284e-11	17.5255	stable
Parp3	-0.738012	3.58659	-12.4687	2.55137e-12	4.03682e-11	17.5239	stable
Ict1	-0.740608	4.51636	-12.4681	2.55405e-12	4.03899e-11	17.5229	stable
Phlpp	0.659109	2.78289	12.4589	2.59533e-12	4.10217e-11	17.5064	stable
Tnfrsf13b	-0.854359	4.77634	-12.4477	2.64738e-12	4.18228e-11	17.4859	stable
2010004N17Rik	0.747219	3.87684	12.439	2.68815e-12	4.24452e-11	17.4702	stable
Ap3m1	-0.741335	3.34733	-12.4362	2.70122e-12	4.26299e-11	17.4652	stable
LOC676724	-0.703714	7.41002	-12.435	2.70737e-12	4.2705e-11	17.4629	stable
Acvr2b	0.739863	3.8248	12.4295	2.73355e-12	4.30959e-11	17.453	stable
EG434077	0.636191	3.88975	12.4287	2.7376e-12	4.31378e-11	17.4514	stable
C030048B08Rik	0.733276	3.31147	12.4226	2.7669e-12	4.35772e-11	17.4405	stable
Dcps	-0.688727	5.68845	-12.4204	2.77755e-12	4.37227e-11	17.4365	stable
Tmem179b	0.628347	6.52025	12.4114	2.82204e-12	4.44003e-11	17.4202	stable
LOC624083	0.705444	3.58352	12.4002	2.87852e-12	4.52659e-11	17.3998	stable
Adk	-0.750669	5.68824	-12.3985	2.88739e-12	4.53822e-11	17.3966	stable
2610301N02Rik	0.648233	2.36864	12.3942	2.90907e-12	4.56998e-11	17.3889	stable
Fam129a	-0.645259	3.43436	-12.3832	2.96618e-12	4.65733e-11	17.3689	stable
4930599N23Rik	0.756386	2.34793	12.3819	2.97347e-12	4.6664e-11	17.3664	stable
Fabp3	-0.614074	6.02287	-12.3801	2.98262e-12	4.67838e-11	17.3632	stable
Ppfia1	0.622336	4.45934	12.3792	2.98729e-12	4.68333e-11	17.3616	stable
Itgb1	0.624099	3.10663	12.3777	2.9954e-12	4.69366e-11	17.3588	stable
EG434858	0.90037	4.46395	12.3761	3.00395e-12	4.70466e-11	17.3559	stable
Entpd7	-0.762099	2.64243	-12.3745	3.0125e-12	4.71566e-11	17.353	stable
Stx4a	0.647604	6.9523	12.3731	3.02015e-12	4.72524e-11	17.3504	stable
Uaca	-0.681567	4.60416	-12.3653	3.0621e-12	4.78845e-11	17.3362	stable
Tec	0.76805	5.77361	12.3649	3.06408e-12	4.78911e-11	17.3355	stable
Cnn2	-0.802924	3.23845	-12.3629	3.07501e-12	4.80377e-11	17.3318	stable
1700013A01Rik	-0.954651	4.80084	-12.3604	3.08867e-12	4.82267e-11	17.3273	stable
Noc4l	-0.6948	4.28666	-12.359	3.096e-12	4.83167e-11	17.3248	stable
2700097O09Rik	-0.695901	4.18079	-12.3582	3.10036e-12	4.83602e-11	17.3234	stable
Snx10	0.59542	6.86961	12.3575	3.10422e-12	4.83961e-11	17.3221	stable
LOC219106	-0.722666	3.30346	-12.3542	3.12282e-12	4.86615e-11	17.316	stable
Atl3	-0.61571	3.53631	-12.3503	3.14403e-12	4.89672e-11	17.309	stable
1110001N06Rik	-0.661714	5.21865	-12.3462	3.16706e-12	4.92851e-11	17.3015	stable
Mrps30	-0.697658	6.43985	-12.3461	3.16763e-12	4.92851e-11	17.3013	stable
LOC100040525	0.66459	6.80031	12.3438	3.18082e-12	4.94653e-11	17.297	stable
Cyp1b1	0.728483	2.42922	12.3404	3.2e-12	4.97385e-11	17.2908	stable
Il10	-0.636318	2.43528	-12.3366	3.2215e-12	5.00475e-11	17.2839	stable
Mrps7	-0.644332	6.71874	-12.3221	3.30571e-12	5.13299e-11	17.2574	stable
Bxdc1	-0.652793	4.24353	-12.3216	3.30859e-12	5.13488e-11	17.2565	stable
Ppp1r14b	-1.11129	4.70138	-12.3154	3.34501e-12	5.1888e-11	17.2452	stable
Ptpn18	-0.877273	6.71604	-12.3149	3.34783e-12	5.19057e-11	17.2444	stable
AI480653	-0.675572	4.05382	-12.3058	3.40254e-12	5.27275e-11	17.2277	stable
Rpp21	-0.610199	6.84016	-12.3044	3.41129e-12	5.28365e-11	17.225	stable
Polr2j	-0.638029	6.42088	-12.3023	3.42355e-12	5.29998e-11	17.2213	stable
2210013O21Rik	0.652112	6.78943	12.3	3.43783e-12	5.31942e-11	17.2171	stable
Chd1	0.632167	3.25435	12.2961	3.46162e-12	5.35355e-11	17.21	stable
Gsk3b	-0.74205	4.51421	-12.2953	3.46657e-12	5.35852e-11	17.2085	stable
Sfrs1	-0.771514	7.44331	-12.2943	3.47278e-12	5.36542e-11	17.2067	stable
2810012D02Rik	-0.611392	2.63895	-12.2898	3.50057e-12	5.40565e-11	17.1985	stable
[truncated: 28,870 more rows]
