# Supplementary material for: Isopsoralen suppresses receptor activator of nuclear factor kappa- β ligand-induced osteoclastogenesis by inhibiting the NF- κ B signaling
Source: PeerJ journal article supplement (doi:10.7717/peerj.14560), 2023-01-10
Supplement: All_raw_data(including_WB_data)_version_2.zip [file All_raw_data%28including_WB_data%29_version_2.zip]

The diagram illustrates the complex signaling network connecting bone marrow-derived monocyte/macrophage precursor cells with osteoclast-specific genes. Key components include:

- Receptors and Ligands:** c-Fms (ligand: M-CSF), IFNGR (ligand: IFN $\gamma$ ), IL1R (ligand: IL1), TNFR1 (ligand: TNF $\alpha$ ), TGFBR (ligand: TGF $\beta$ ), RANK (ligand: RANKL, inhibited by OPG), OSCAR/PTR-A (ligand: Ig-like R), TREM2/SIRP- $\beta$ 1 (ligand: Ig-like R), Fc $\gamma$ R (ligand: FcRy), DAP12 (ligand: Ig-like R), and IFNAR (ligand: IFN $\beta$ ).
- Intracellular Signaling Pathways:**
  - PI3K-Akt pathway:** Involves Src, PI3K, Akt, leading to cell proliferation and survival.
  - NF- $\kappa$ B pathway:** Involves IKK $\alpha$ , IKK $\beta$ , NIK, NF $\kappa$ B, leading to DNA transcription.
  - MAPK pathway:** Involves MEK1, MKK6, MKK7, JNK, leading to AP1 activation.
  - Calcium signaling pathway:** Involves IP3, Ca $^{2+}$ , CN, CaMKIV, leading to CREB activation.
  - Jak-STAT pathway:** Involves STAT1/2, leading to IRF9 activation.
- Osteoclast-Specific Genes:** CTSK, TRAP, CTR,  $\beta$ 3 integrin, and c-Fos are shown as downstream targets of these pathways.
