# Supplementary material for: Isopsoralen suppresses receptor activator of nuclear factor kappa- β ligand-induced osteoclastogenesis by inhibiting the NF- κ B signaling
Source: PeerJ journal article supplement (doi:10.7717/peerj.14560), 2023-01-10
Supplement: All_raw_data(including_WB_data)_version_2.zip [file All_raw_data%28including_WB_data%29_version_2.zip]

11111
