# Supplementary figures and images for: Isopsoralen suppresses receptor activator of nuclear factor kappa- β ligand-induced osteoclastogenesis by inhibiting the NF- κ B signaling
Source: PeerJ journal article supplement (doi:10.7717/peerj.14560), 2023-01-10

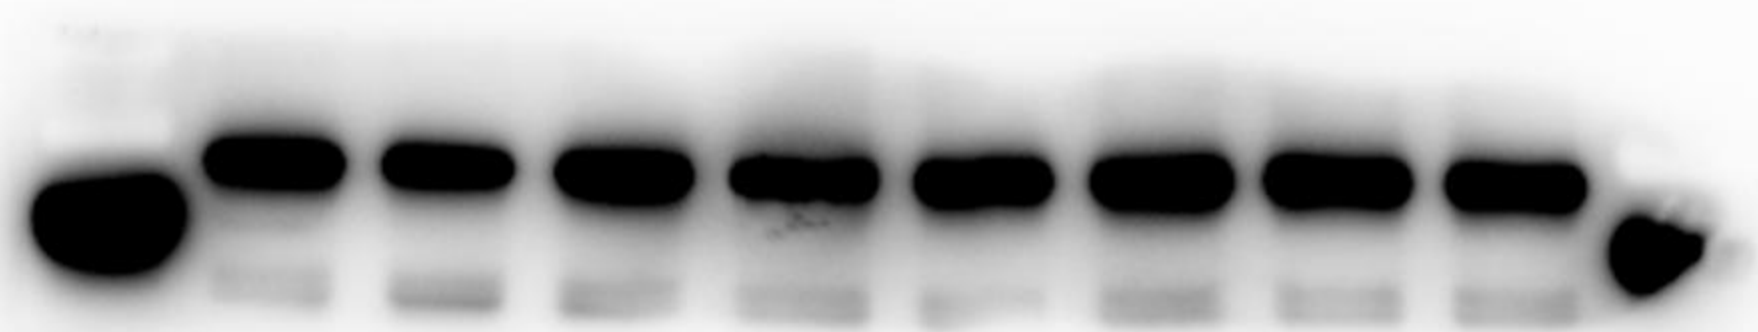

Supplement: All_raw_data(including_WB_data)_version_2.zip [file All_raw_data%28including_WB_data%29_version_2.zip]

# KEGG Pathway Enrichment

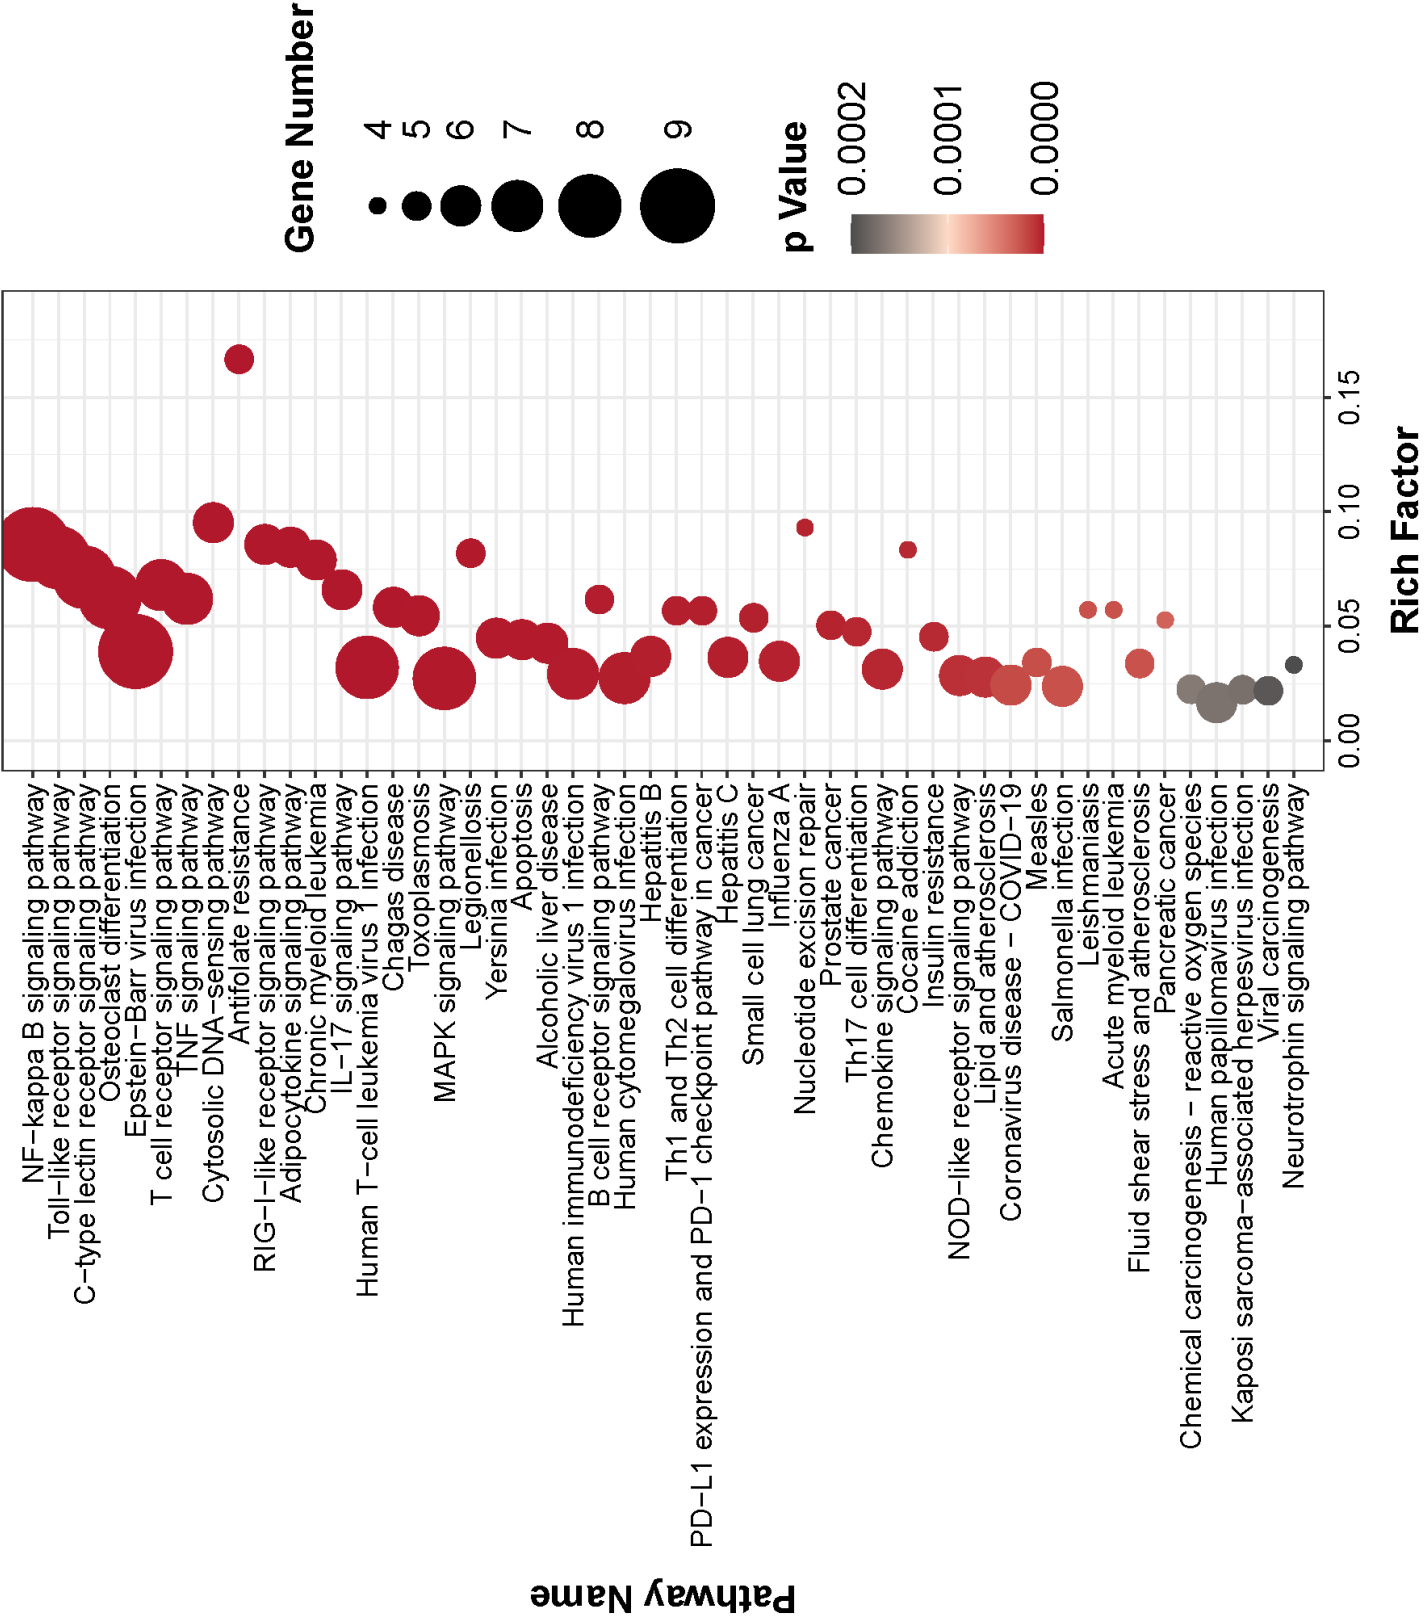

Supplement: All_raw_data(including_WB_data)_version_2.zip [file All_raw_data%28including_WB_data%29_version_2.zip]

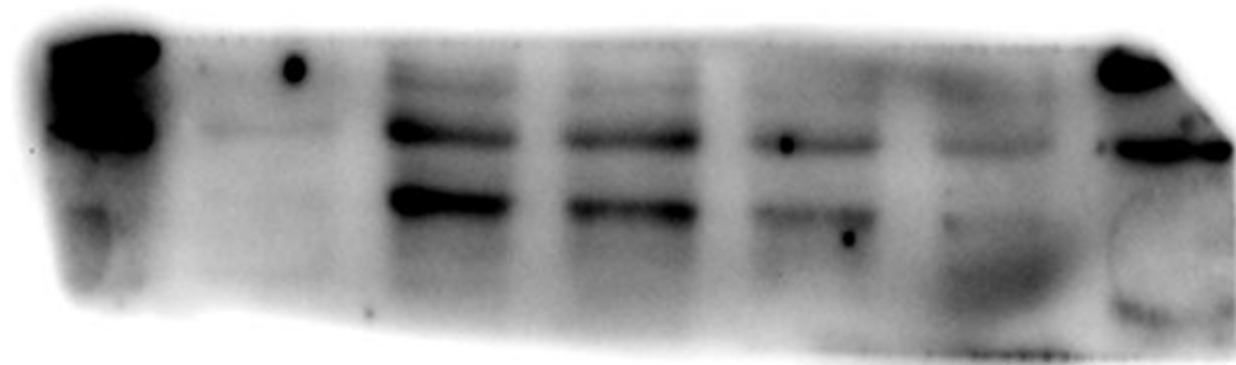

Supplement: All_raw_data(including_WB_data)_version_2.zip [file All_raw_data%28including_WB_data%29_version_2.zip]

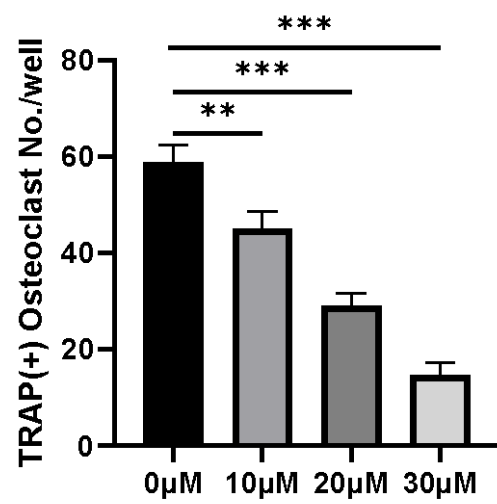

Supplement: All_raw_data(including_WB_data)_version_2.zip [file All_raw_data%28including_WB_data%29_version_2.zip]

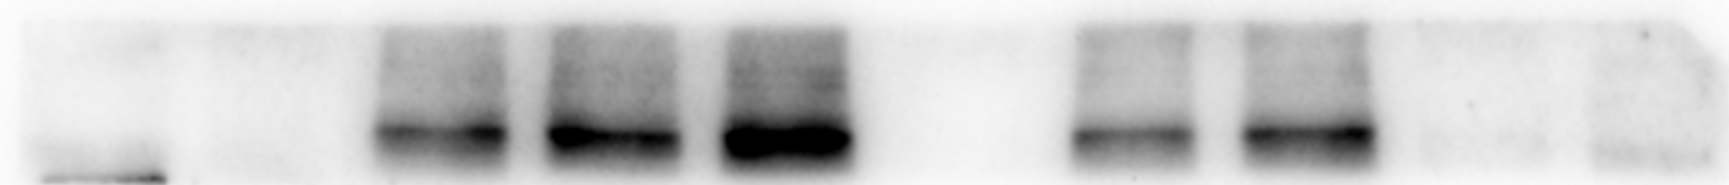

Supplement: All_raw_data(including_WB_data)_version_2.zip [file All_raw_data%28including_WB_data%29_version_2.zip]

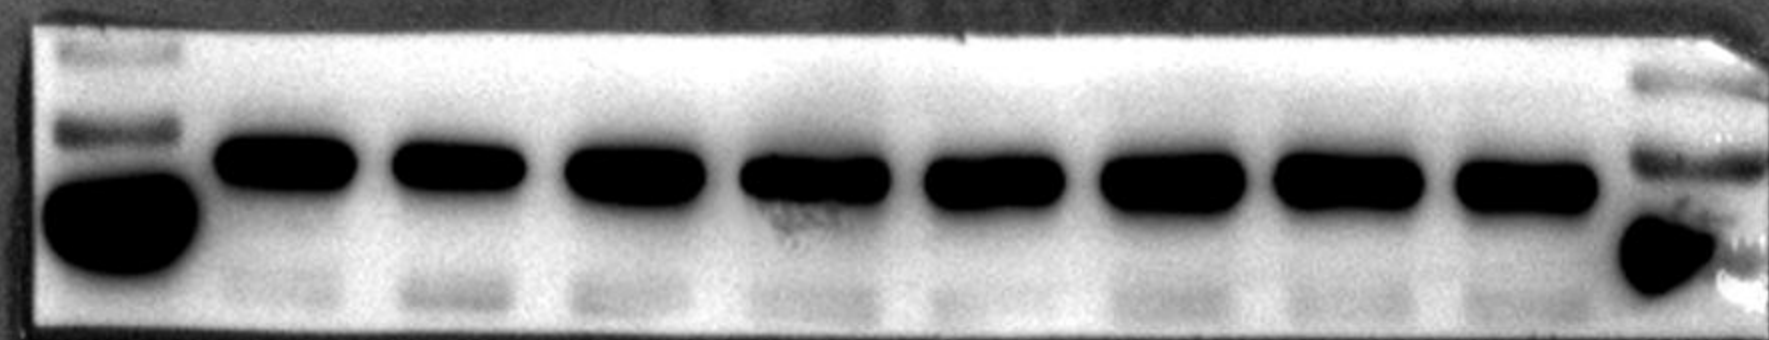

Supplement: All_raw_data(including_WB_data)_version_2.zip [file All_raw_data%28including_WB_data%29_version_2.zip]

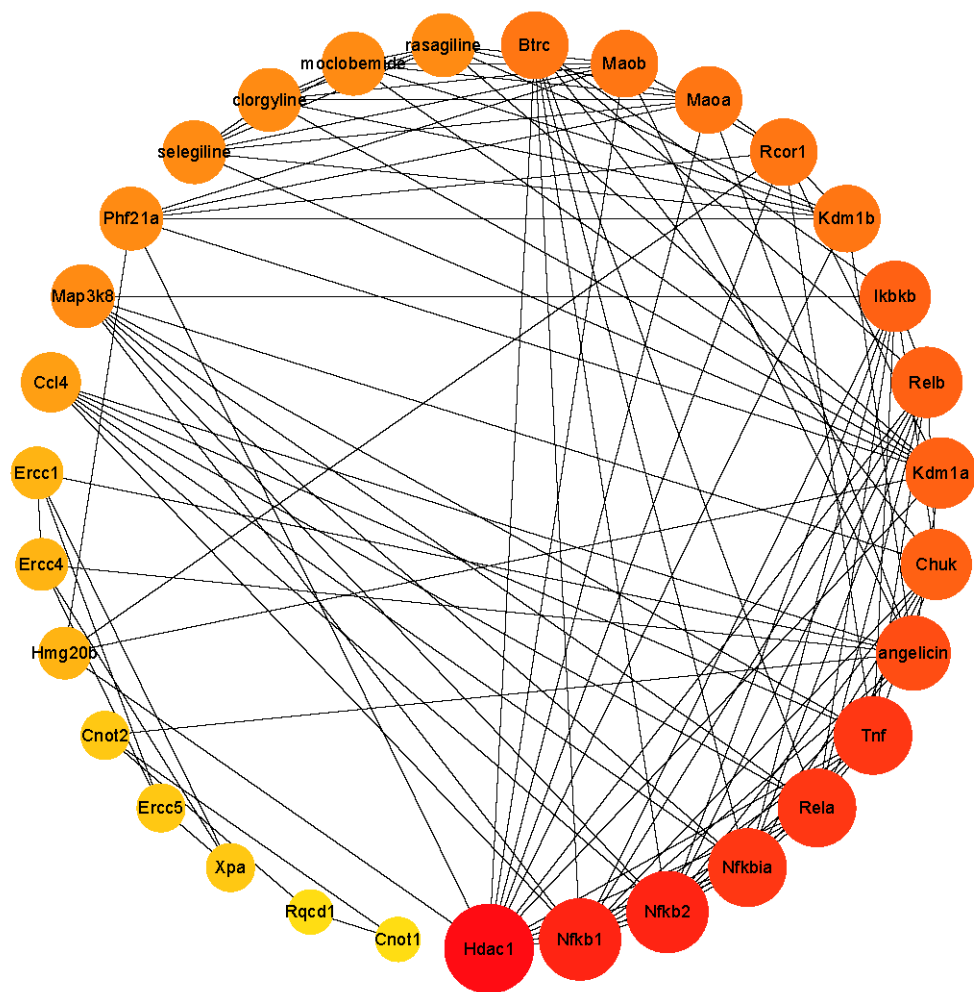

Supplement: All_raw_data(including_WB_data)_version_2.zip [file All_raw_data%28including_WB_data%29_version_2.zip]

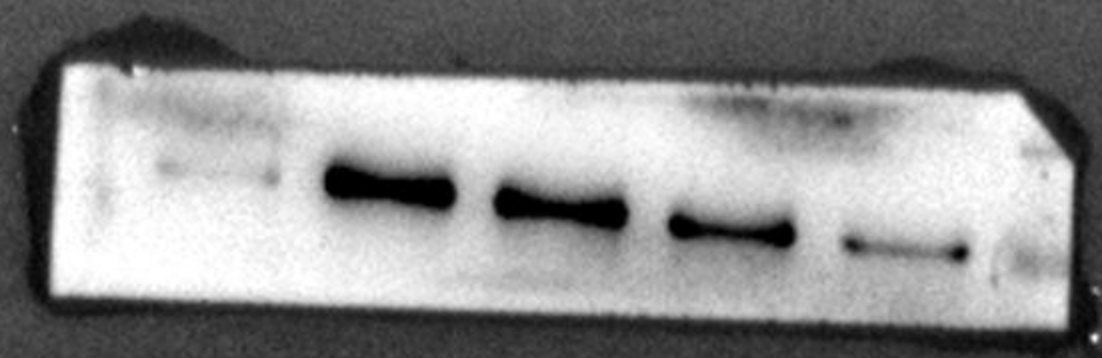

Supplement: All_raw_data(including_WB_data)_version_2.zip [file All_raw_data%28including_WB_data%29_version_2.zip]

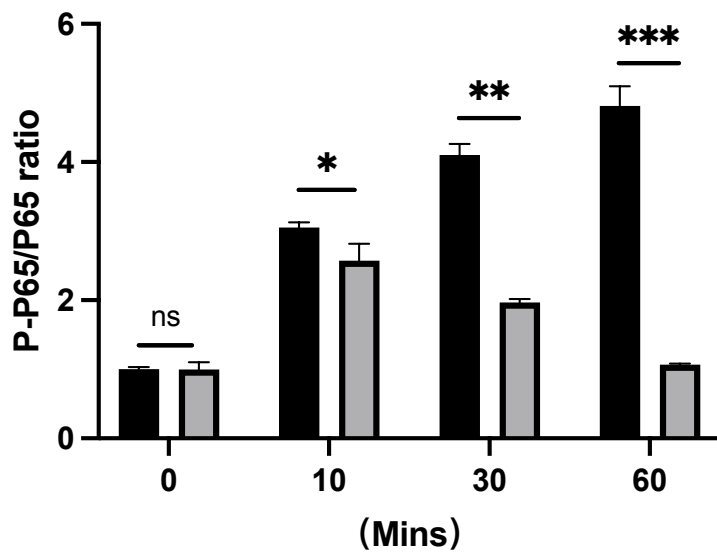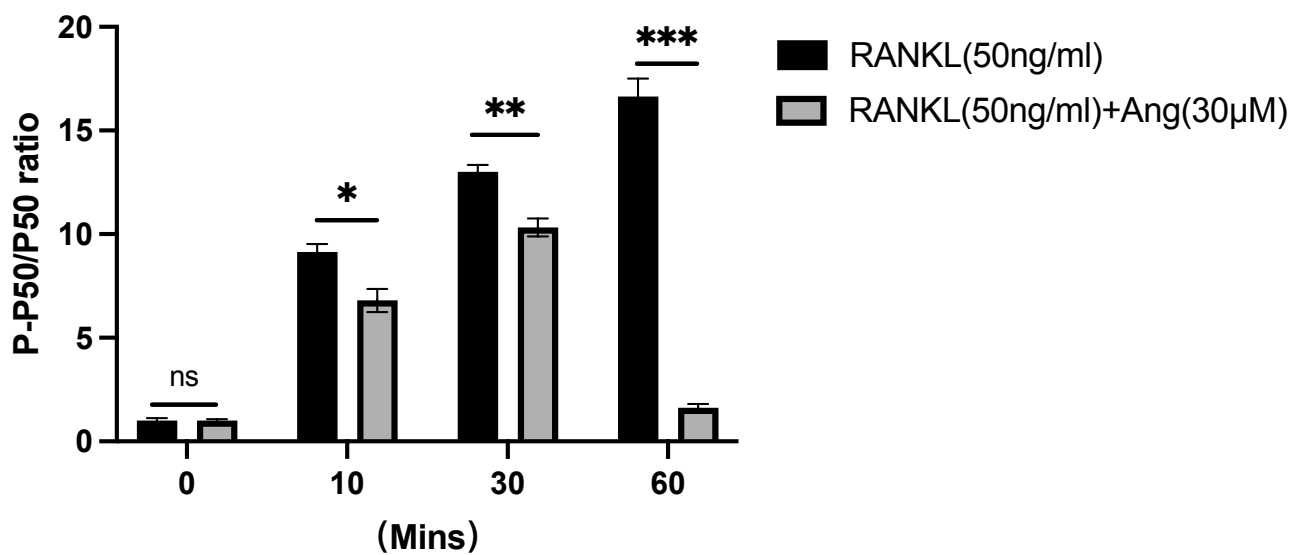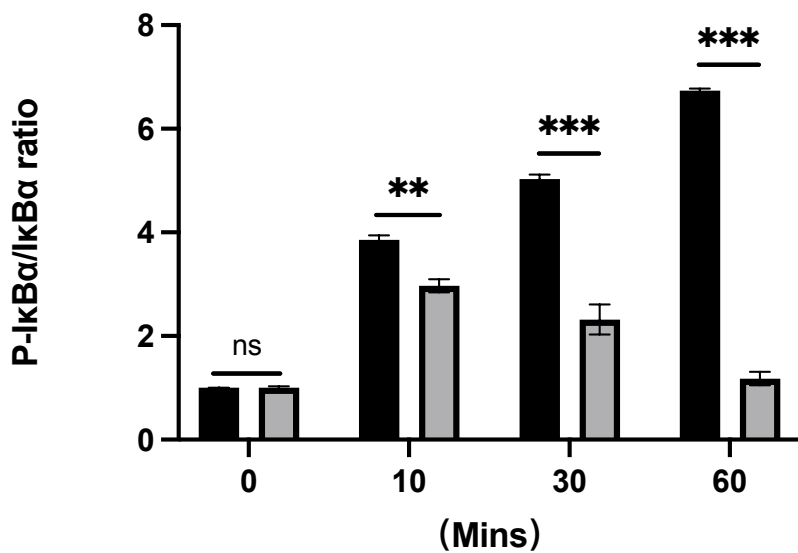

Supplement: All_raw_data(including_WB_data)_version_2.zip [file All_raw_data%28including_WB_data%29_version_2.zip]

65kDa

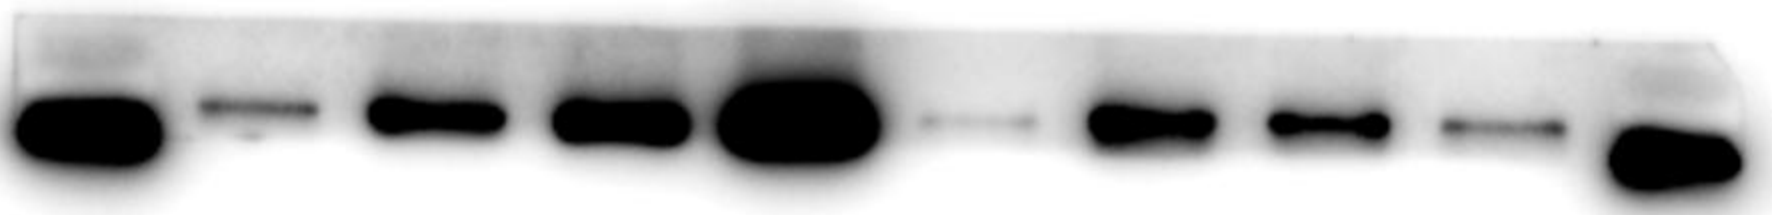

65kDa

Supplement: All_raw_data(including_WB_data)_version_2.zip [file All_raw_data%28including_WB_data%29_version_2.zip]

65kDa

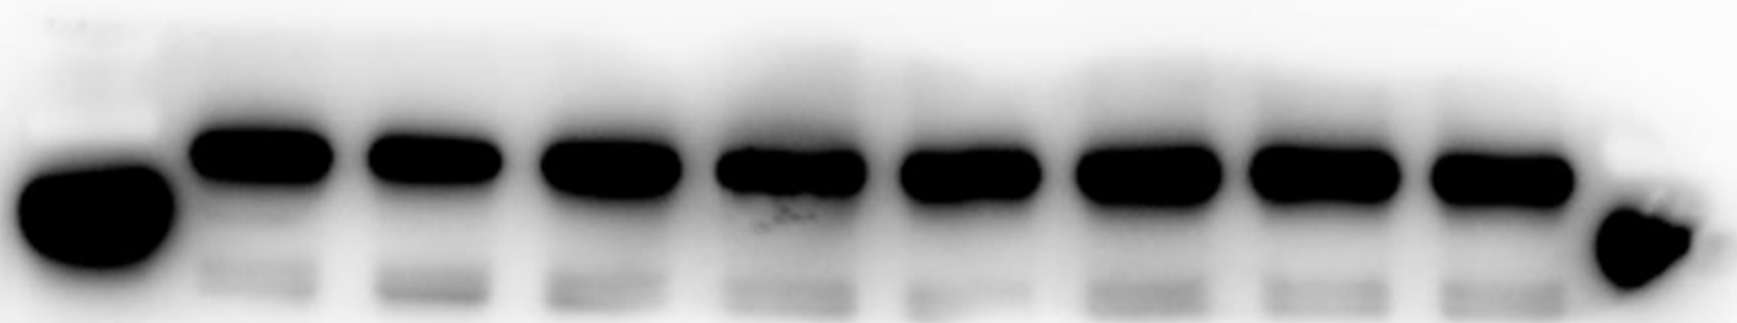

65kDa

Supplement: All_raw_data(including_WB_data)_version_2.zip [file All_raw_data%28including_WB_data%29_version_2.zip]

KEGG Pathway

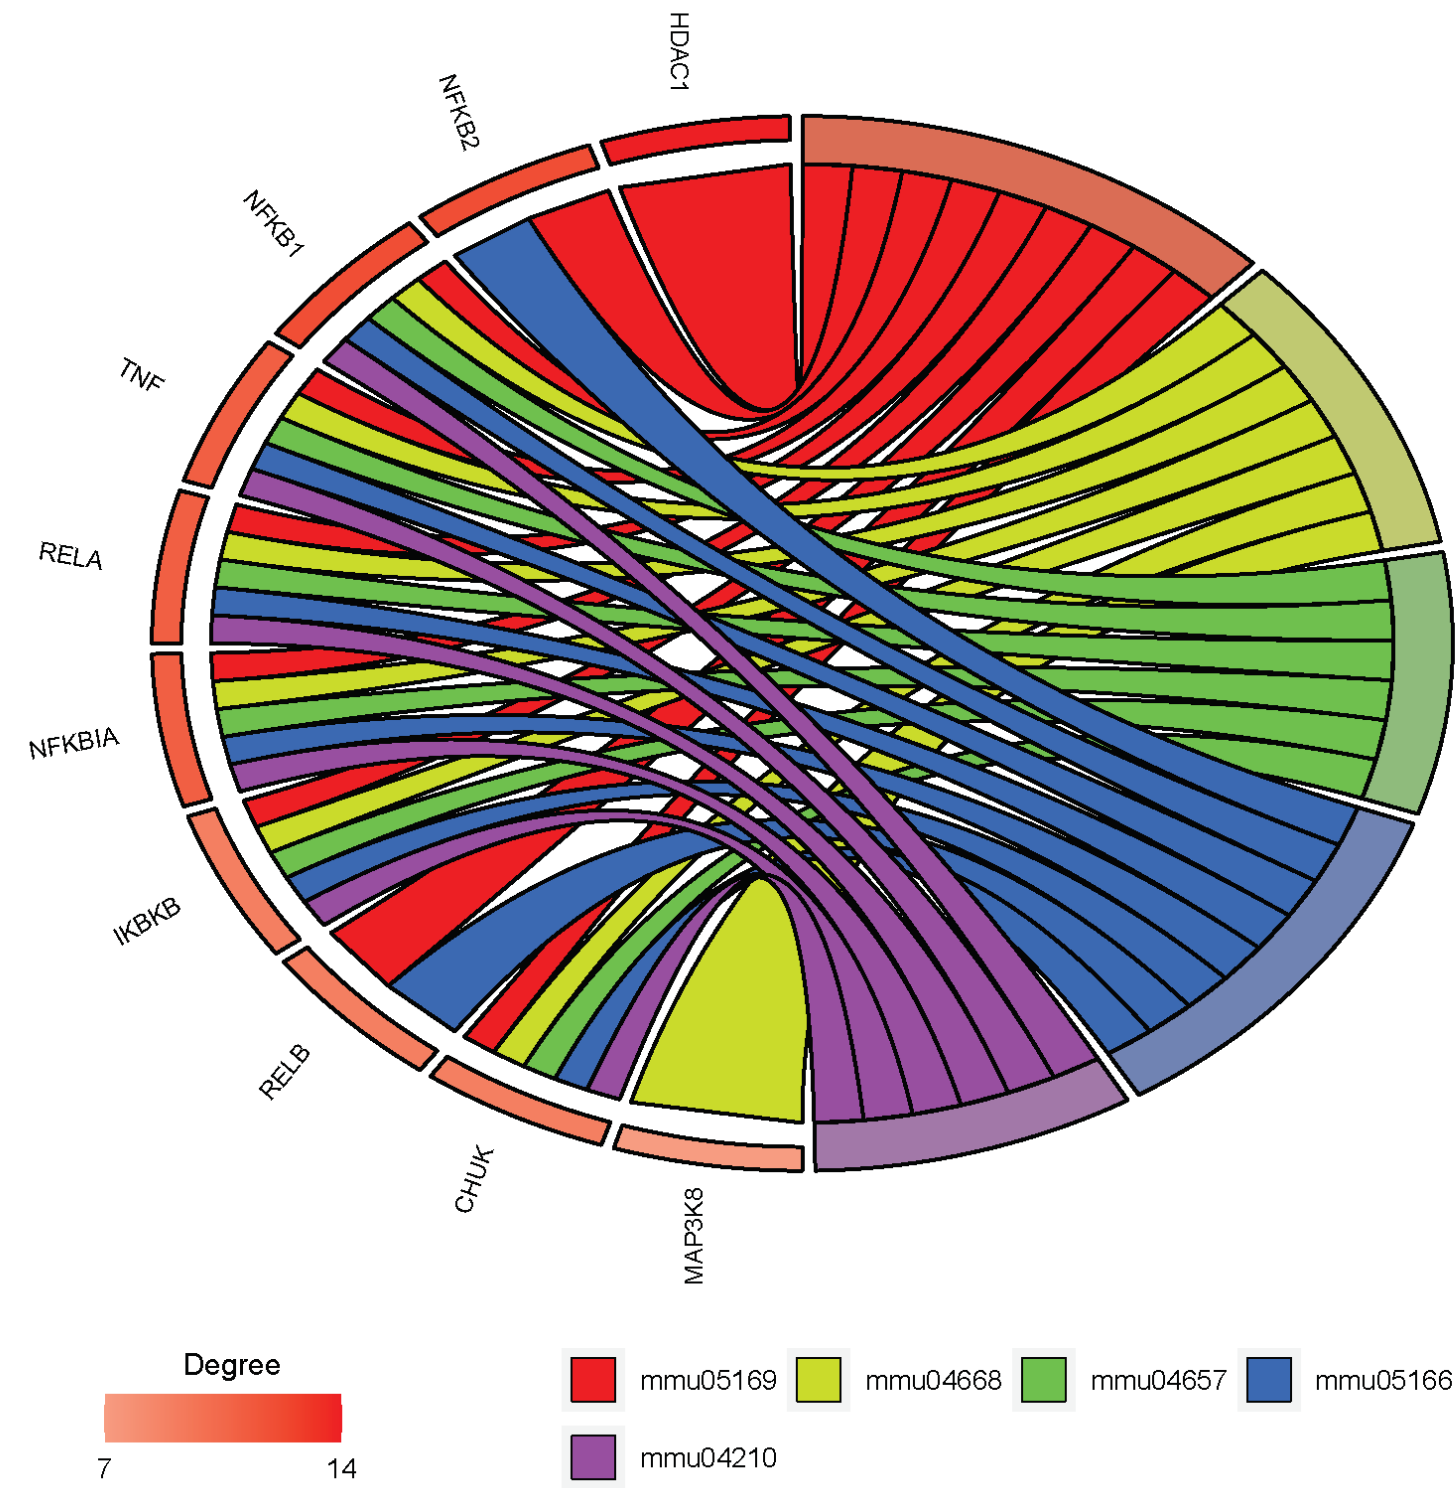

Supplement: All_raw_data(including_WB_data)_version_2.zip [file All_raw_data%28including_WB_data%29_version_2.zip]

35kDa 35kDa

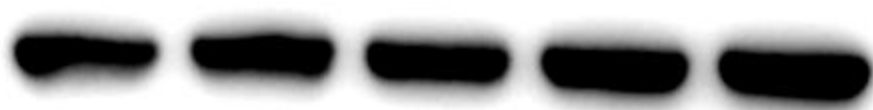

Supplement: All_raw_data(including_WB_data)_version_2.zip [file All_raw_data%28including_WB_data%29_version_2.zip]

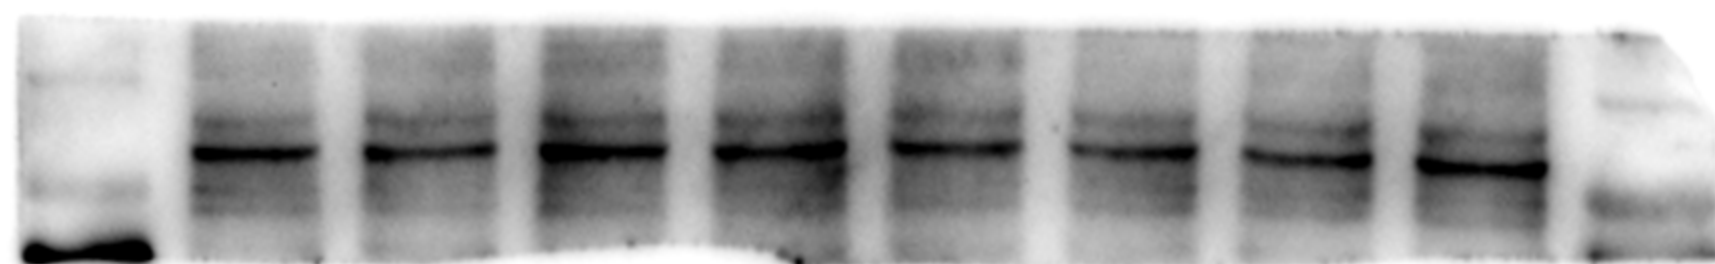

Supplement: All_raw_data(including_WB_data)_version_2.zip [file All_raw_data%28including_WB_data%29_version_2.zip]

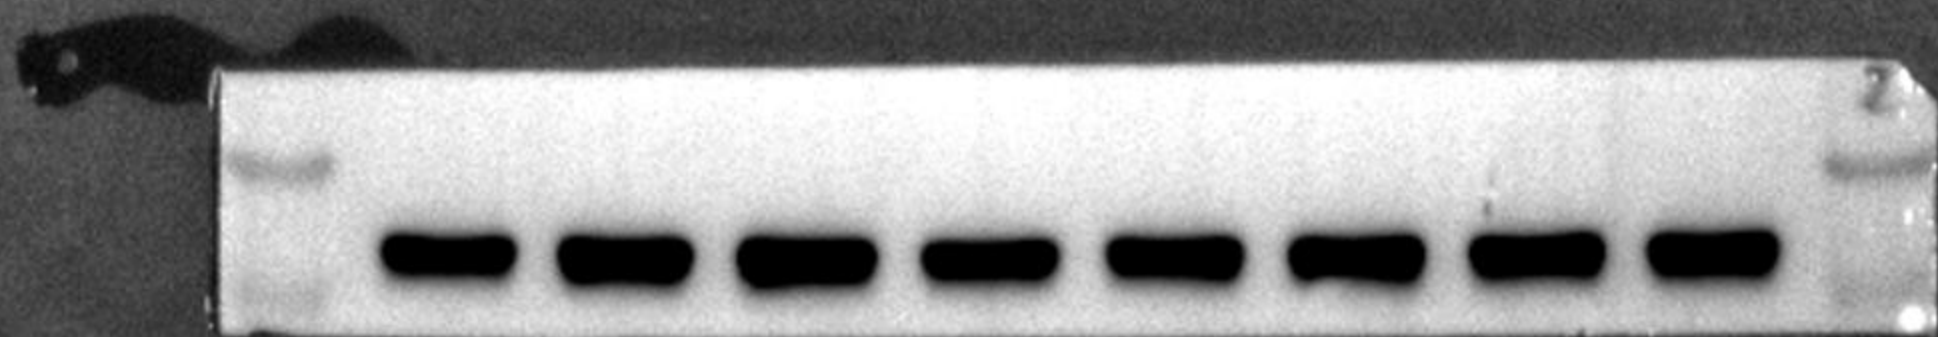

Supplement: All_raw_data(including_WB_data)_version_2.zip [file All_raw_data%28including_WB_data%29_version_2.zip]

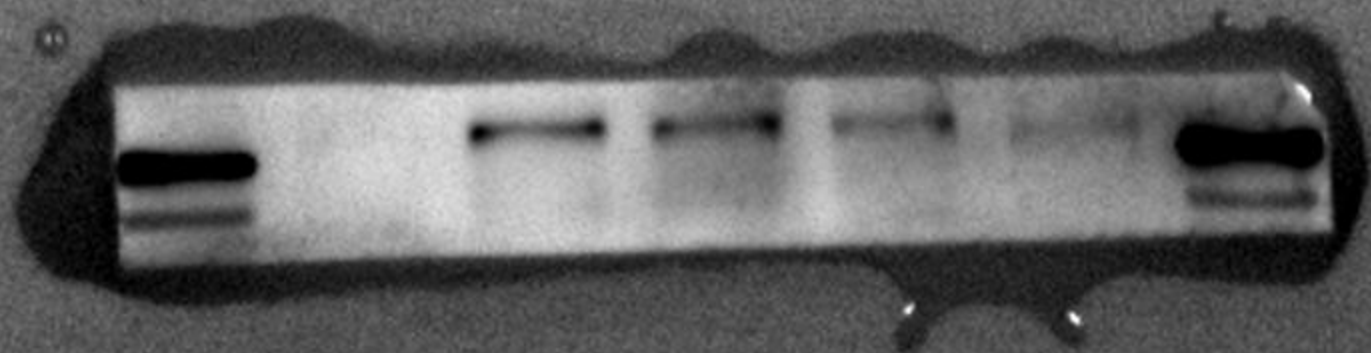

Supplement: All_raw_data(including_WB_data)_version_2.zip [file All_raw_data%28including_WB_data%29_version_2.zip]

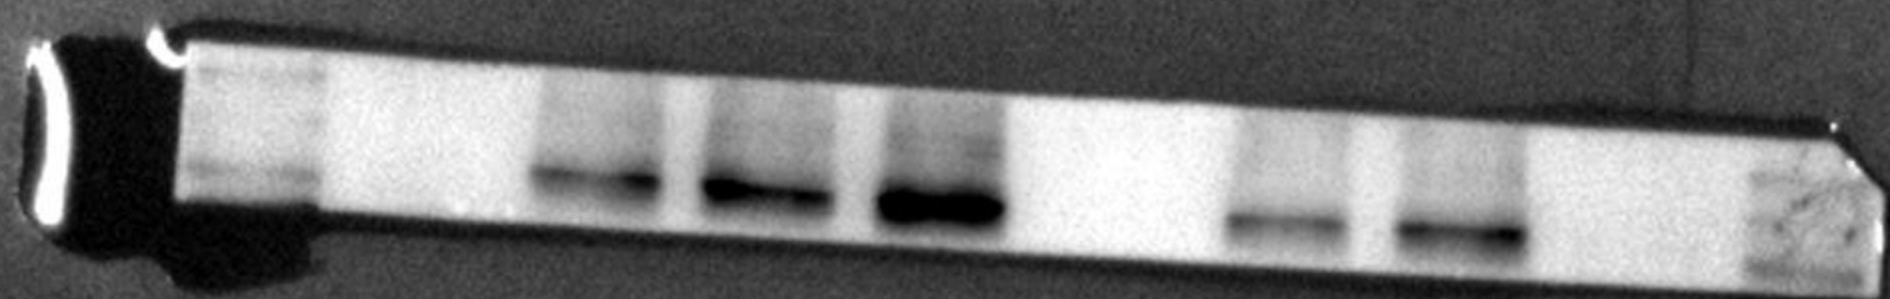

Supplement: All_raw_data(including_WB_data)_version_2.zip [file All_raw_data%28including_WB_data%29_version_2.zip]

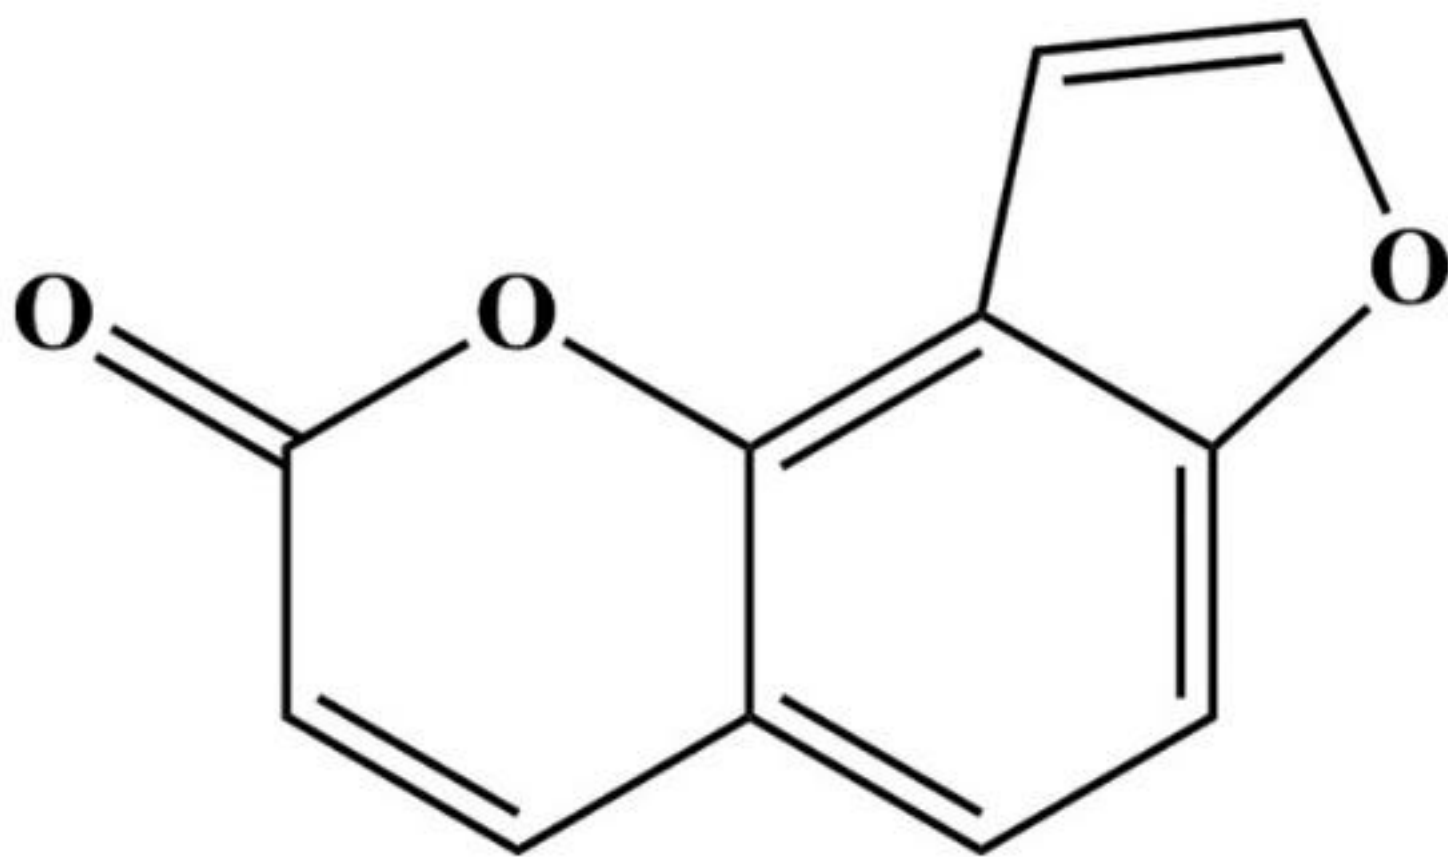

Supplement: All_raw_data(including_WB_data)_version_2.zip [file All_raw_data%28including_WB_data%29_version_2.zip]

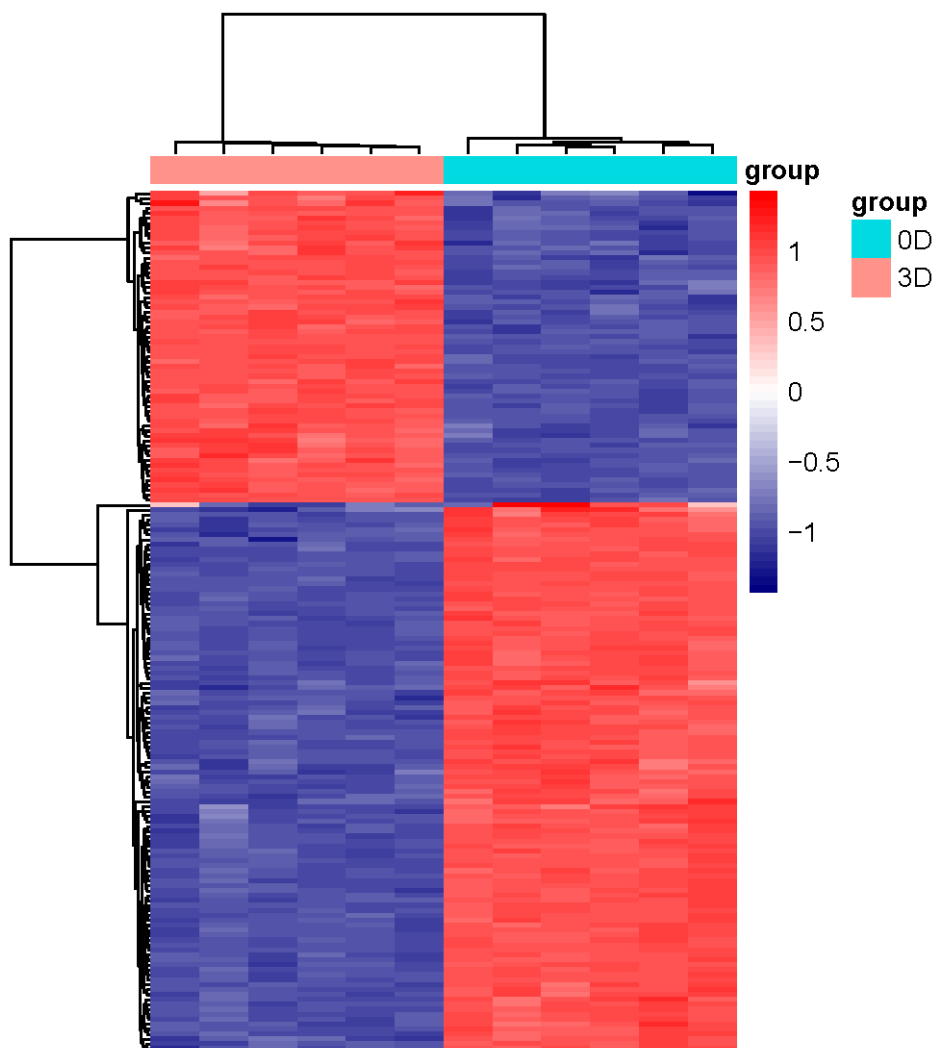

Supplement: All_raw_data(including_WB_data)_version_2.zip [file All_raw_data%28including_WB_data%29_version_2.zip]

24H

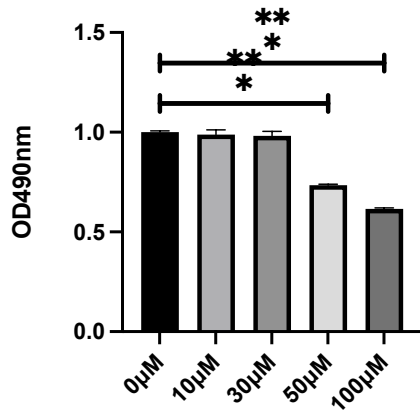

48H

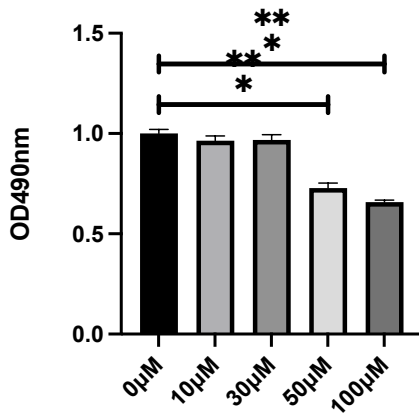

72H

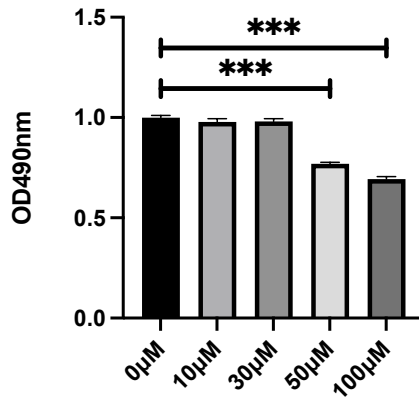

Supplement: All_raw_data(including_WB_data)_version_2.zip [file All_raw_data%28including_WB_data%29_version_2.zip]

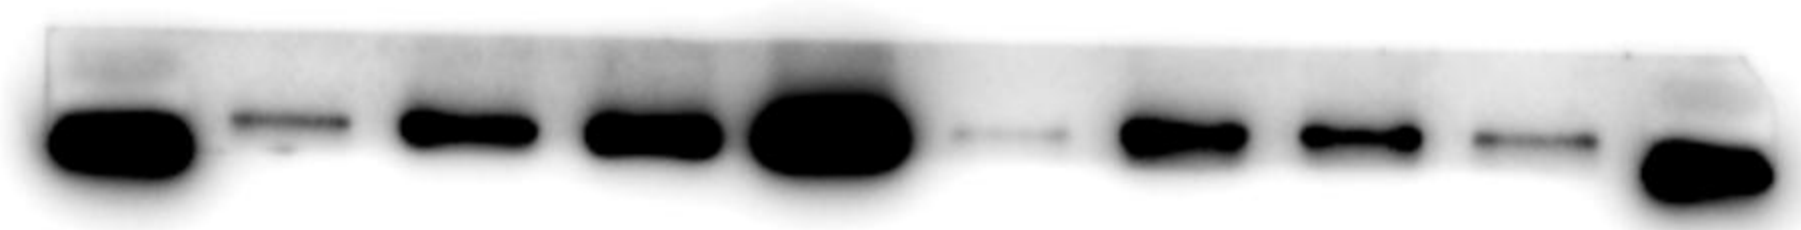

Supplement: All_raw_data(including_WB_data)_version_2.zip [file All_raw_data%28including_WB_data%29_version_2.zip]

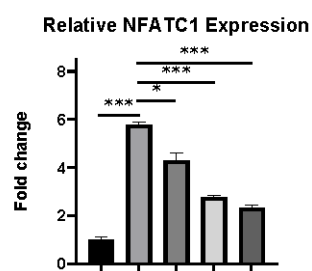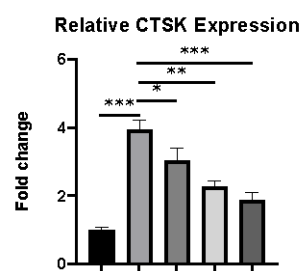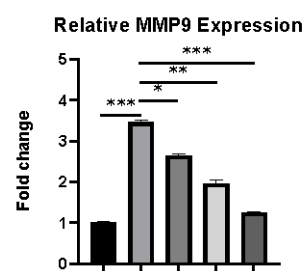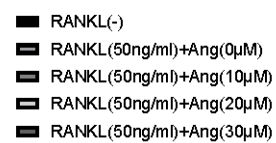

Supplement: All_raw_data(including_WB_data)_version_2.zip [file All_raw_data%28including_WB_data%29_version_2.zip]

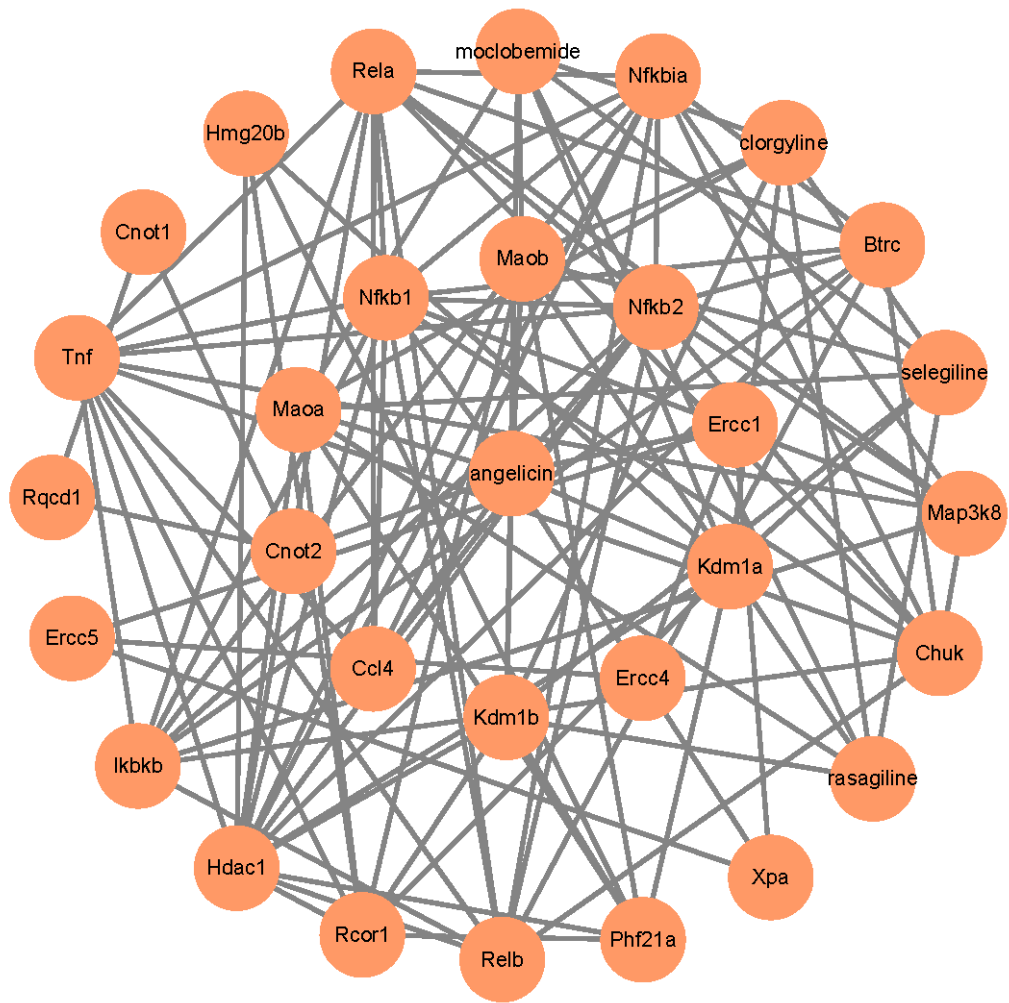

Supplement: All_raw_data(including_WB_data)_version_2.zip [file All_raw_data%28including_WB_data%29_version_2.zip]

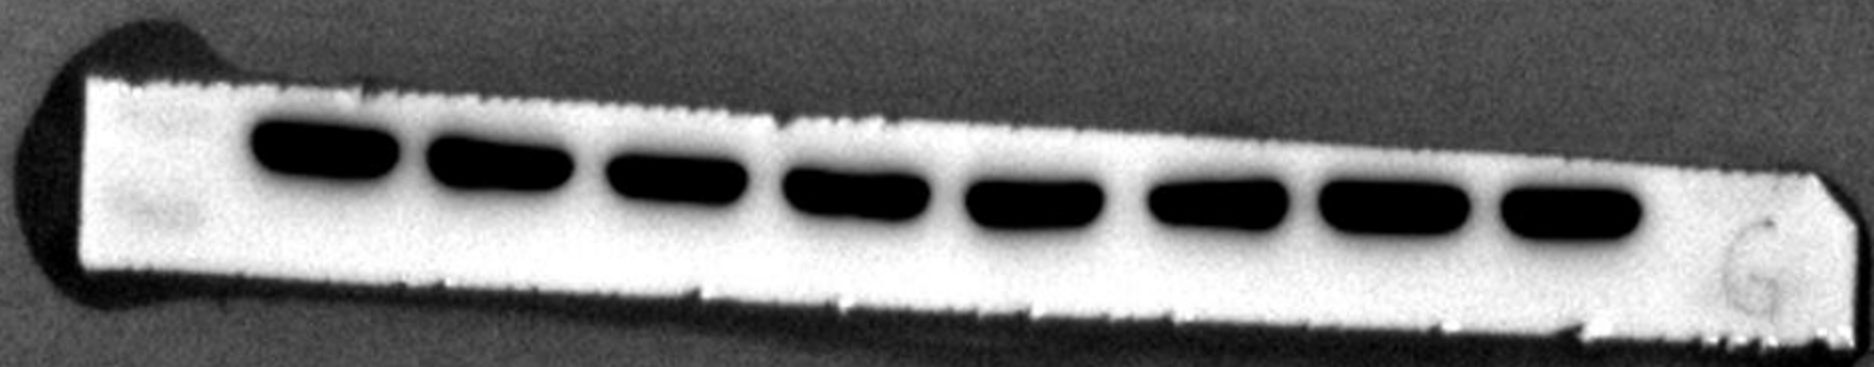

Supplement: All_raw_data(including_WB_data)_version_2.zip [file All_raw_data%28including_WB_data%29_version_2.zip]

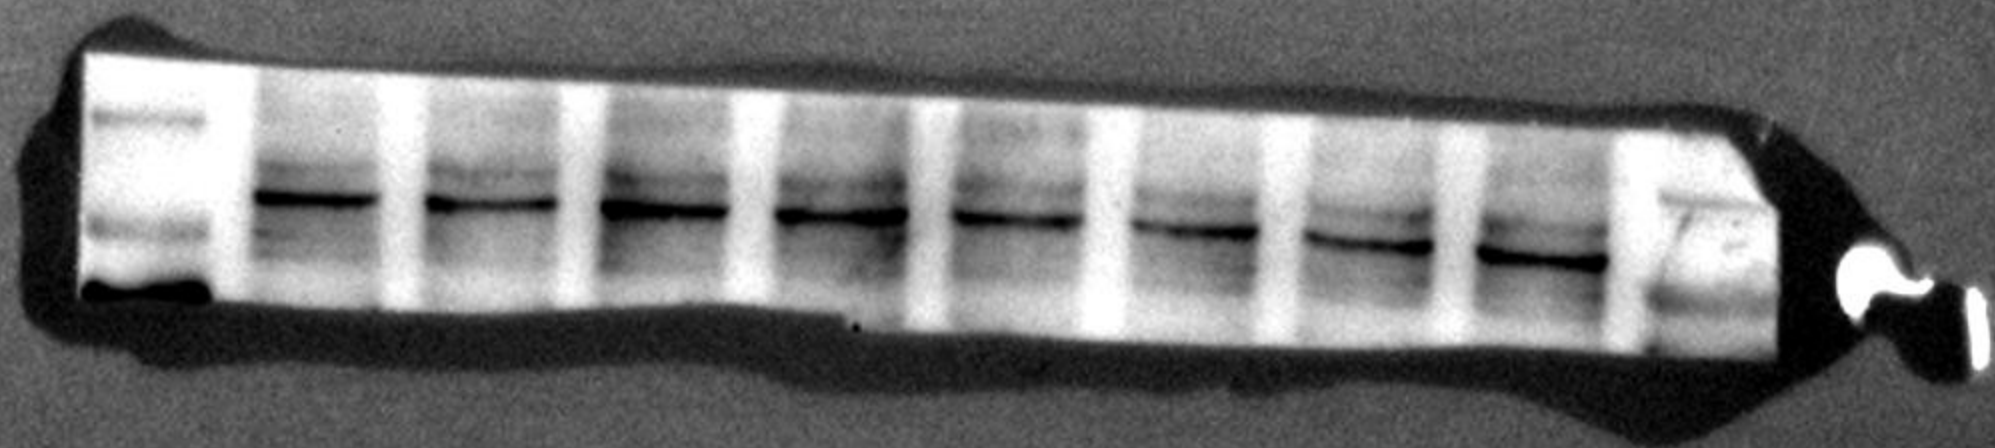

Supplement: All_raw_data(including_WB_data)_version_2.zip [file All_raw_data%28including_WB_data%29_version_2.zip]

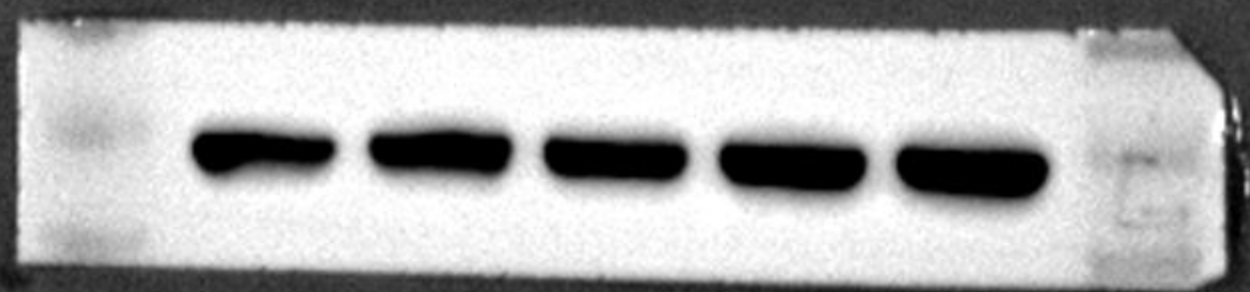

Supplement: All_raw_data(including_WB_data)_version_2.zip [file All_raw_data%28including_WB_data%29_version_2.zip]

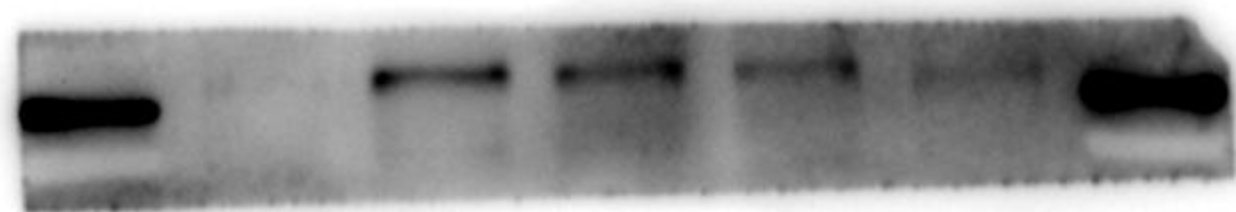

Supplement: All_raw_data(including_WB_data)_version_2.zip [file All_raw_data%28including_WB_data%29_version_2.zip]

39kDa

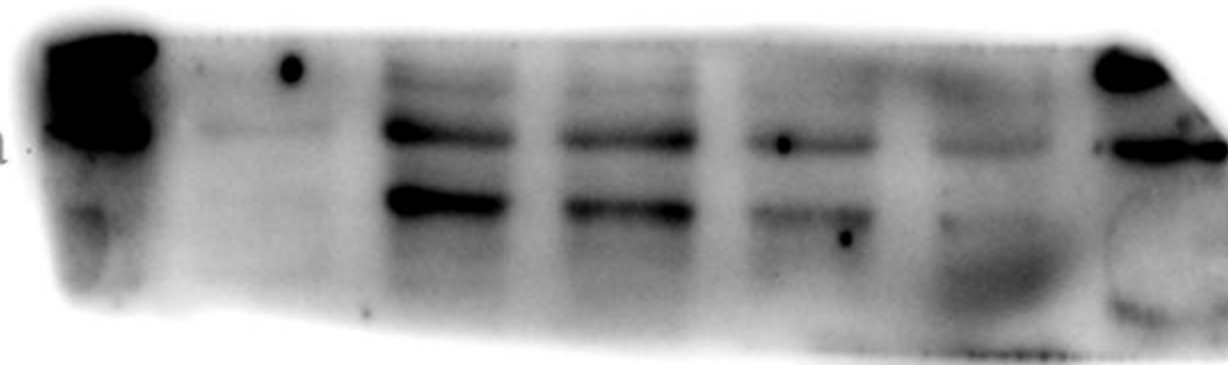

39kDa

Supplement: All_raw_data(including_WB_data)_version_2.zip [file All_raw_data%28including_WB_data%29_version_2.zip]

40kDa

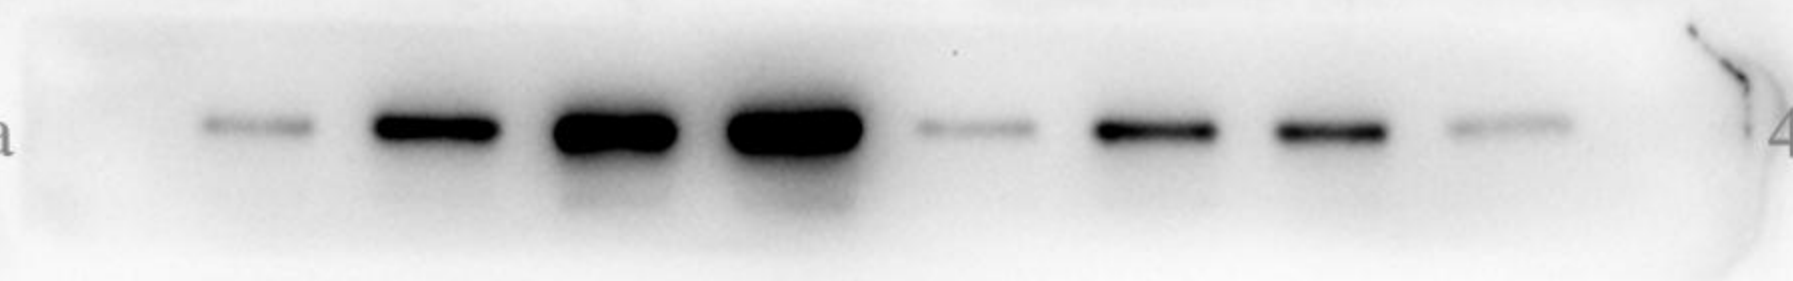

40kDa

Supplement: All_raw_data(including_WB_data)_version_2.zip [file All_raw_data%28including_WB_data%29_version_2.zip]

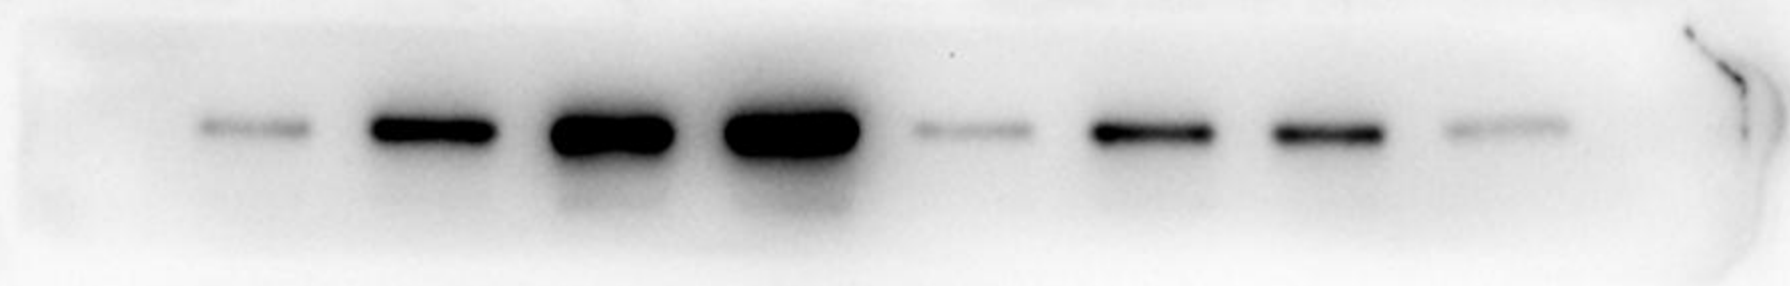

Supplement: All_raw_data(including_WB_data)_version_2.zip [file All_raw_data%28including_WB_data%29_version_2.zip]

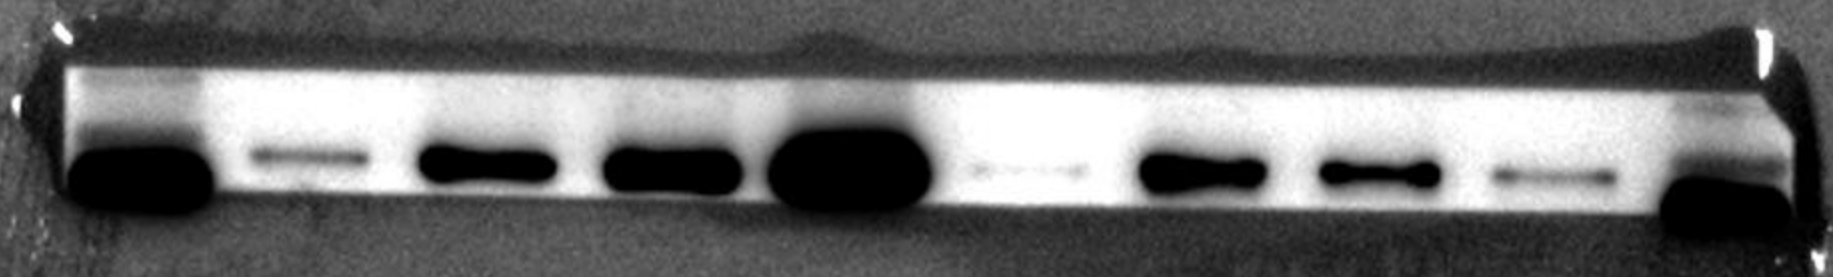

Supplement: All_raw_data(including_WB_data)_version_2.zip [file All_raw_data%28including_WB_data%29_version_2.zip]

# KEGG Pathway Enrichment

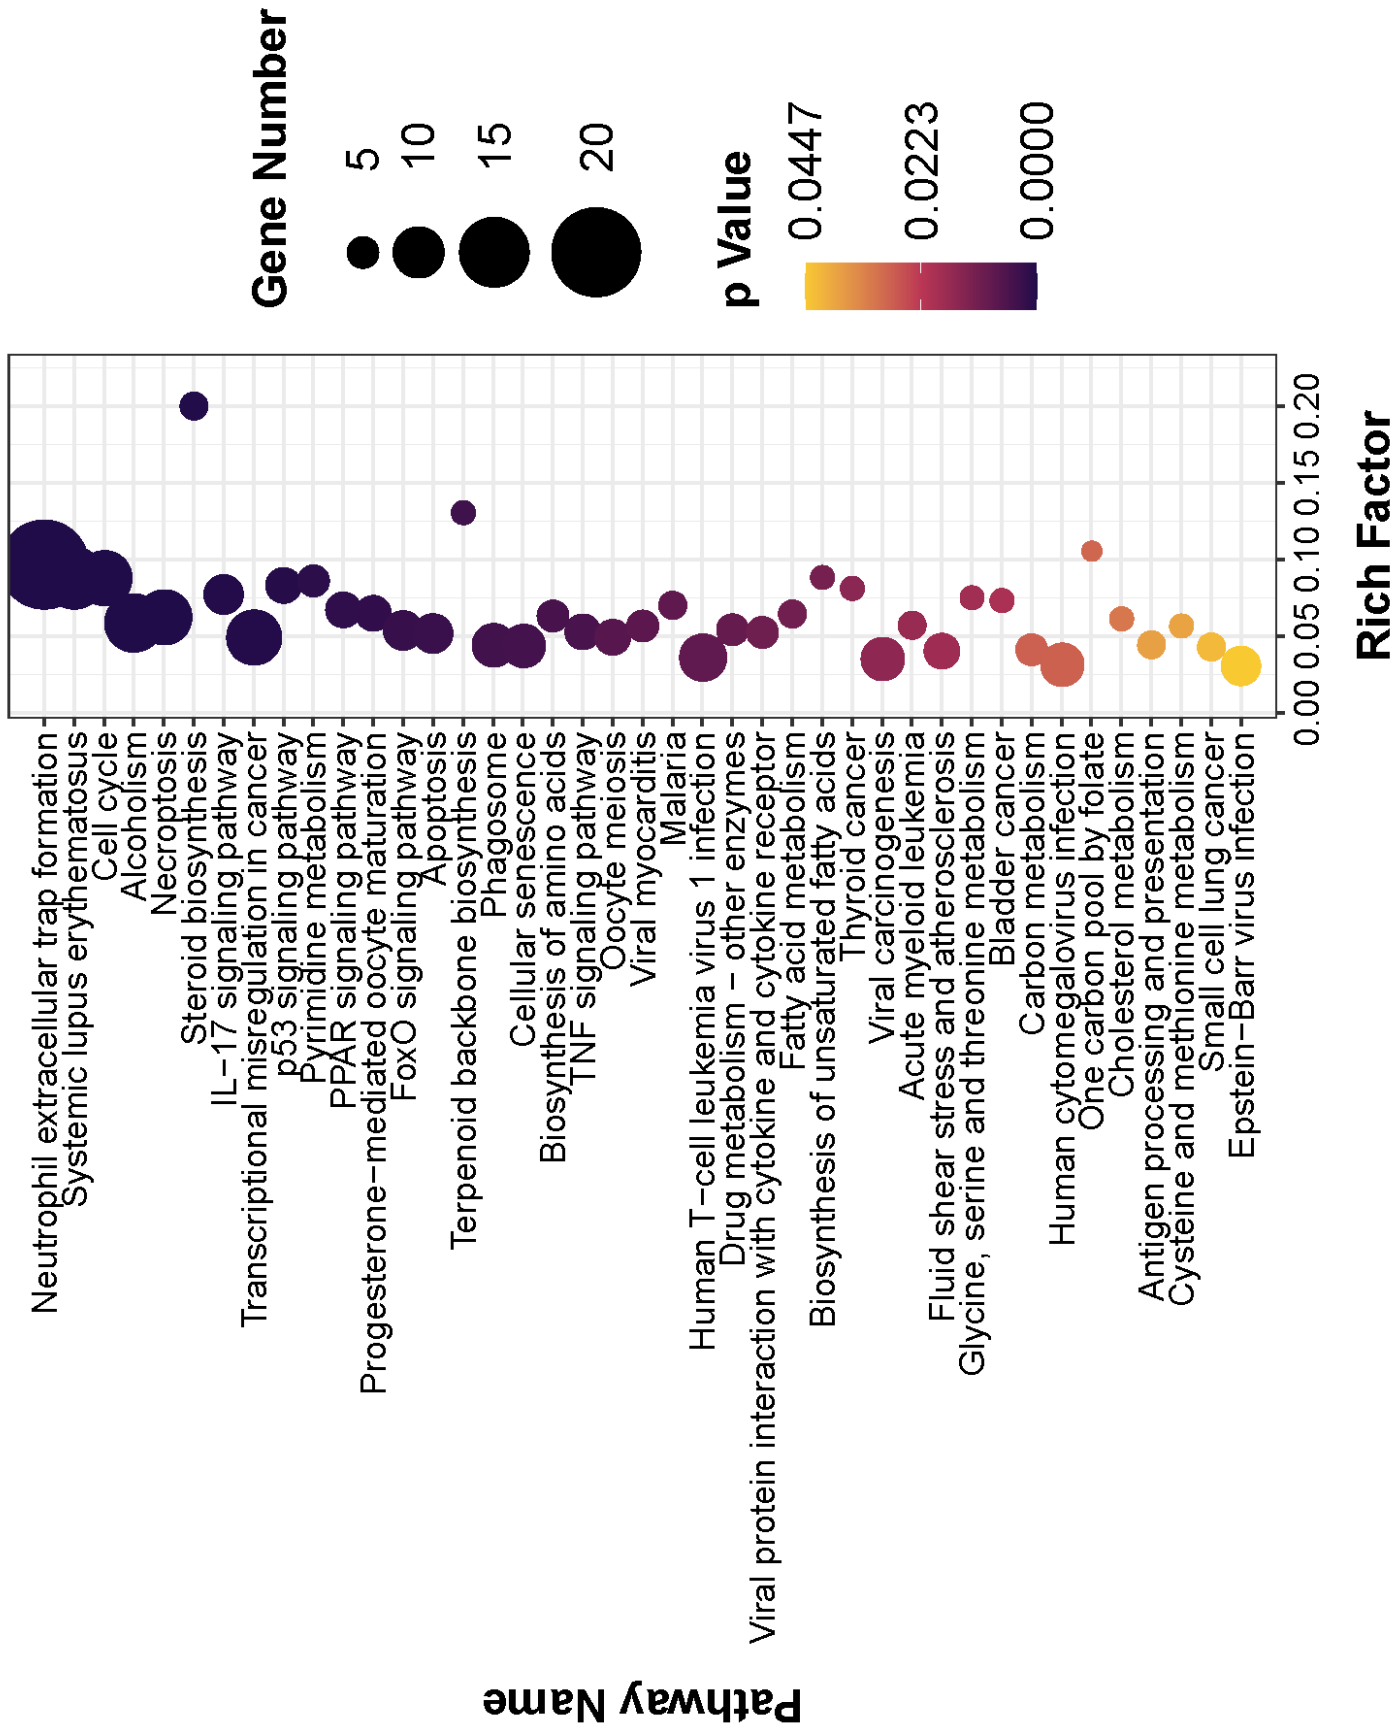

Supplement: All_raw_data(including_WB_data)_version_2.zip [file All_raw_data%28including_WB_data%29_version_2.zip]

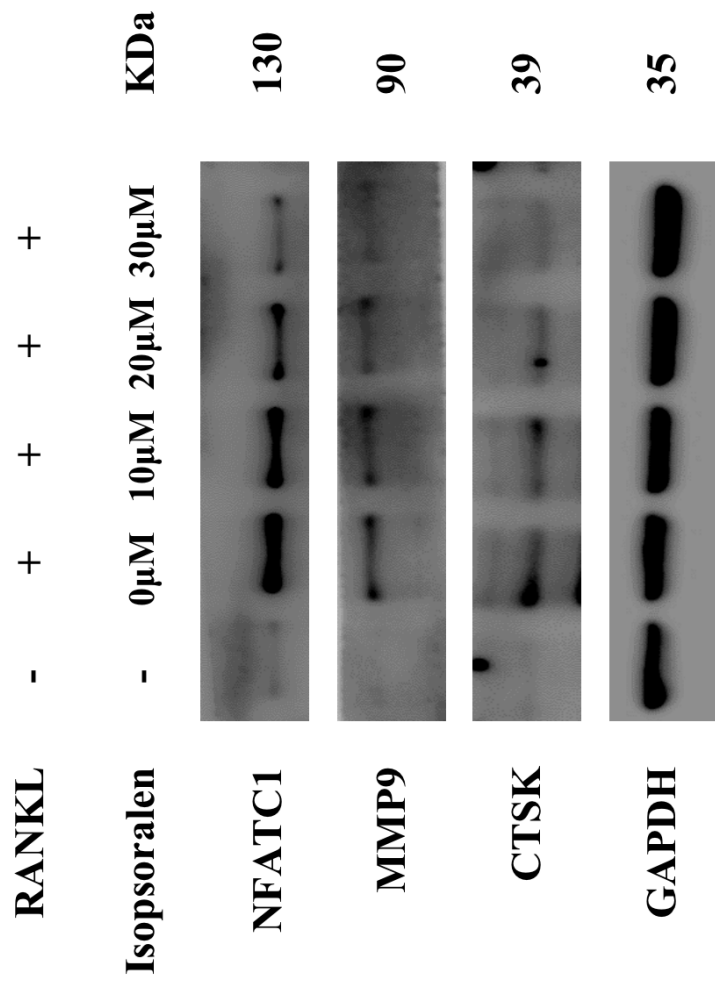

Supplement: All_raw_data(including_WB_data)_version_2.zip [file All_raw_data%28including_WB_data%29_version_2.zip]

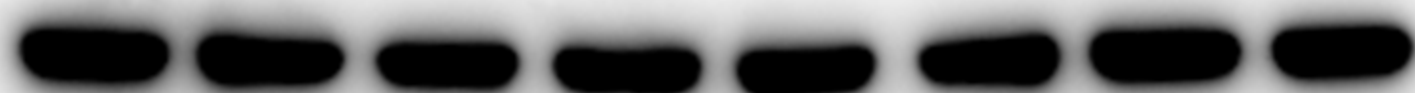

Supplement: All_raw_data(including_WB_data)_version_2.zip [file All_raw_data%28including_WB_data%29_version_2.zip]

50kDa

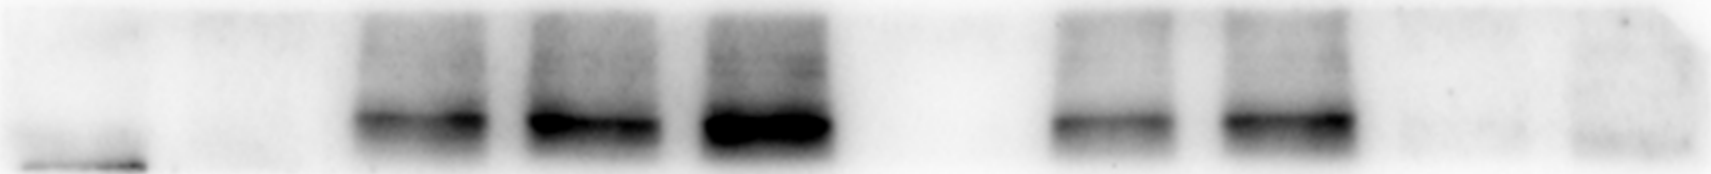

50kDa

Supplement: All_raw_data(including_WB_data)_version_2.zip [file All_raw_data%28including_WB_data%29_version_2.zip]

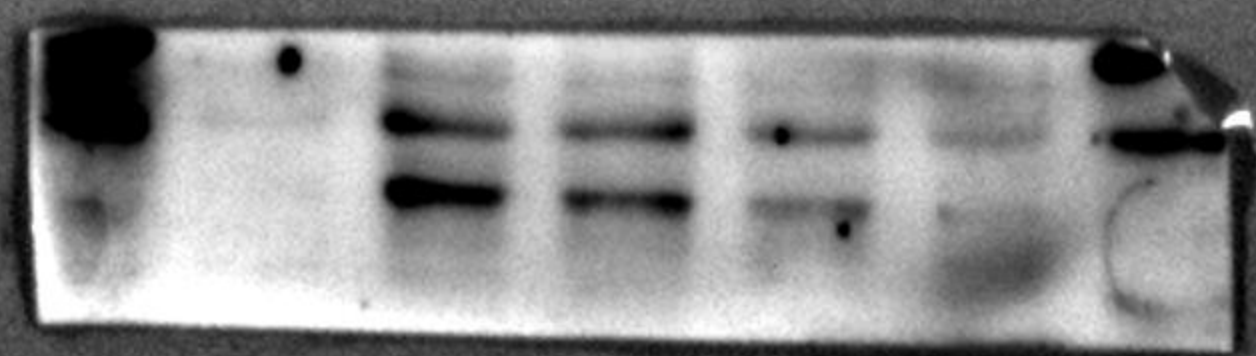

Supplement: All_raw_data(including_WB_data)_version_2.zip [file All_raw_data%28including_WB_data%29_version_2.zip]

35kDa

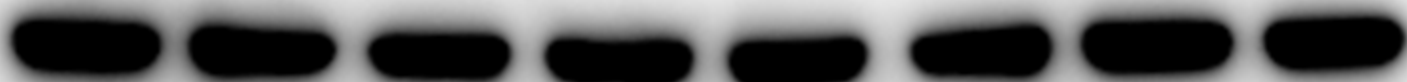

35kDa

Supplement: All_raw_data(including_WB_data)_version_2.zip [file All_raw_data%28including_WB_data%29_version_2.zip]

39kDa

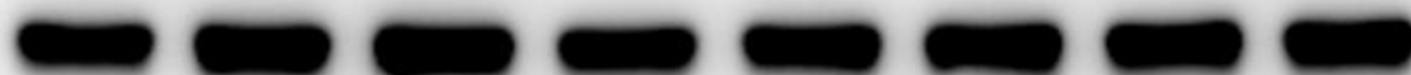

39kDa

Supplement: All_raw_data(including_WB_data)_version_2.zip [file All_raw_data%28including_WB_data%29_version_2.zip]

130kDa

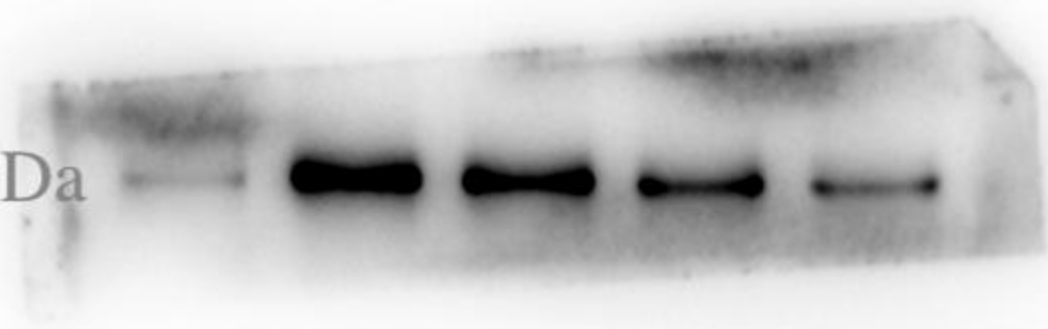

Supplement: All_raw_data(including_WB_data)_version_2.zip [file All_raw_data%28including_WB_data%29_version_2.zip]

105kDa

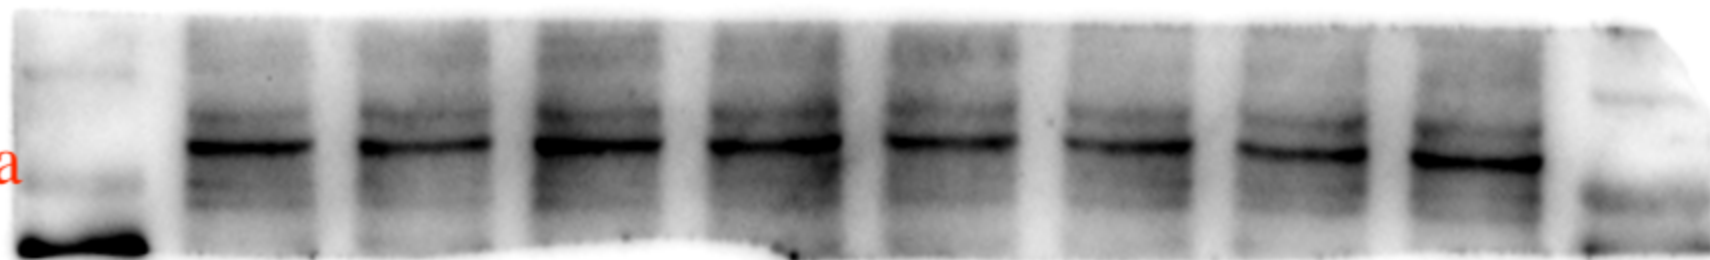

105kDa

Supplement: All_raw_data(including_WB_data)_version_2.zip [file All_raw_data%28including_WB_data%29_version_2.zip]

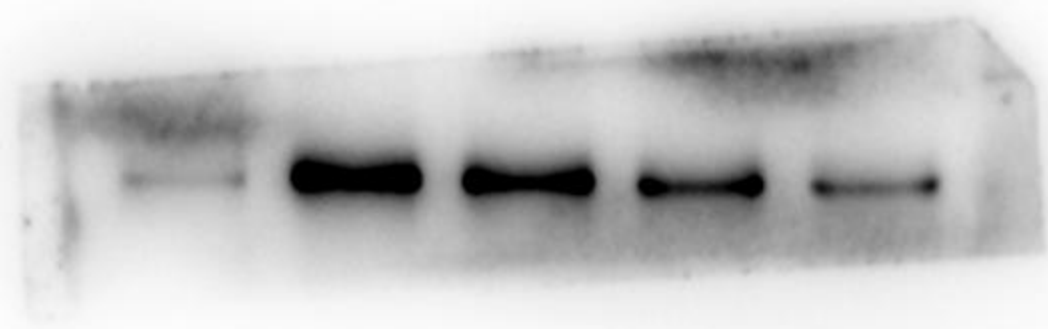

Supplement: All_raw_data(including_WB_data)_version_2.zip [file All_raw_data%28including_WB_data%29_version_2.zip]

**RANKL(50ng/ml)**

**RANKL(-)**

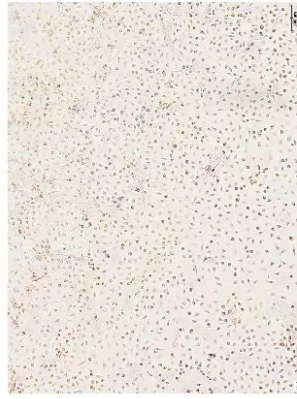

**0 $\mu$ M**

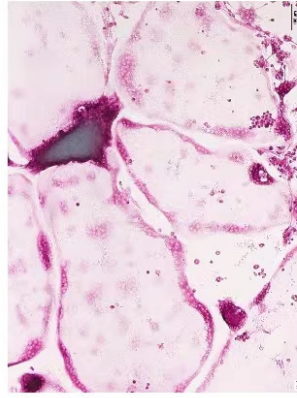

**10 $\mu$ M**

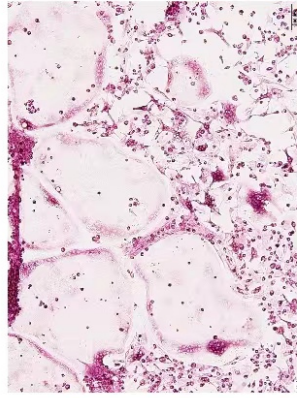

**20 $\mu$ M**

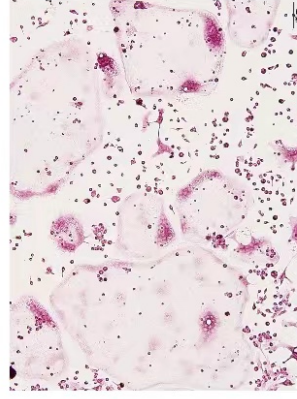

**30 $\mu$ M**

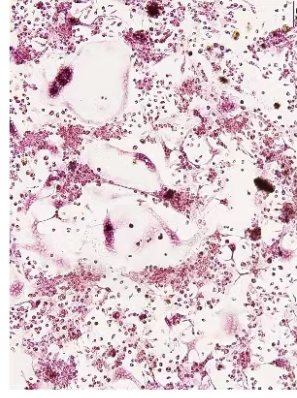

Supplement: All_raw_data(including_WB_data)_version_2.zip [file All_raw_data%28including_WB_data%29_version_2.zip]

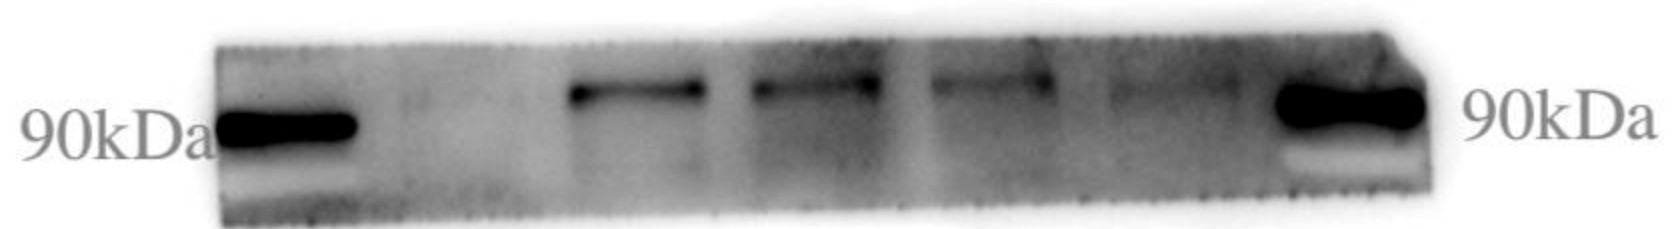

Supplement: All_raw_data(including_WB_data)_version_2.zip [file All_raw_data%28including_WB_data%29_version_2.zip]

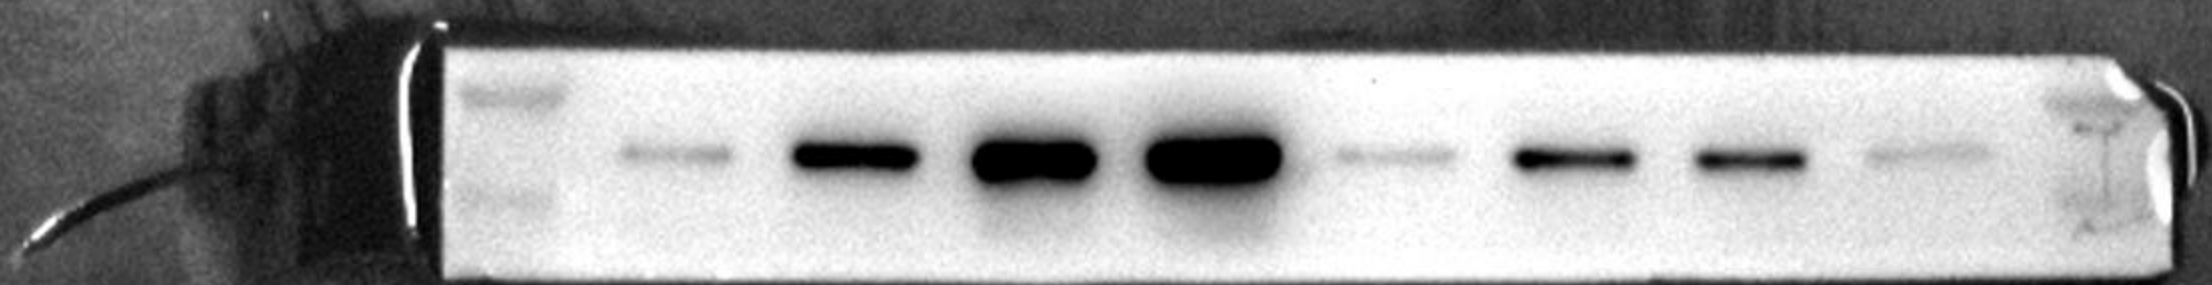

Supplement: All_raw_data(including_WB_data)_version_2.zip [file All_raw_data%28including_WB_data%29_version_2.zip]
